# Supplementary material for: The RATIONS (Reducing Activation of Tuberculosis by Improvement of Nutritional Status) study: a cluster randomised trial of nutritional support (food rations) to reduce TB incidence in household contacts of patients with microbiologically confirmed pulmonary tuberculosis in communities with a high prevalence of undernutrition, Jharkhand, India
Source: PubMed Central journal article supplement — BMJ Open. 2021 May 20;11(5):e047210. doi: 10.1136/bmjopen-2020-047210 (PMC8141431; doi:10.1136/bmjopen-2020-047210), 2021-05-20
Supplement: bmjopen-2020-047210.draft_revisions.pdf [file bmjopen-2020-047210.draft_revisions.pdf]

# BMJ Open

BMJ Open is committed to open peer review. As part of this commitment we make the peer review history of every article we publish publicly available.

When an article is published we post the peer reviewers' comments and the authors' responses online. We also post the versions of the paper that were used during peer review. These are the versions that the peer review comments apply to.

The versions of the paper that follow are the versions that were submitted during the peer review process. They are not the versions of record or the final published versions. They should not be cited or distributed as the published version of this manuscript.

BMJ Open is an open access journal and the full, final, typeset and author-corrected version of record of the manuscript is available on our site with no access controls, subscription charges or pay-per-view fees (<http://bmjopen.bmj.com>).

If you have any questions on BMJ Open's open peer review process please email [info.bmjopen@bmj.com](mailto:info.bmjopen@bmj.com)

# BMJ Open

**The RATIONS (Reducing Activation of Tuberculosis by Improvement of Nutritional Status) study: A cluster randomized trial of nutritional support (food rations) to reduce TB-incidence in household contacts of patients with microbiologically confirmed pulmonary tuberculosis in communities with a high prevalence of undernutrition, Jharkhand, India**

|                               |                                                                                                                                                                                                                                                                                                                                                                                                                                                                                                                                                                                                                                                                                                                                                                                                                                                                                                                                                                                     |
|-------------------------------|-------------------------------------------------------------------------------------------------------------------------------------------------------------------------------------------------------------------------------------------------------------------------------------------------------------------------------------------------------------------------------------------------------------------------------------------------------------------------------------------------------------------------------------------------------------------------------------------------------------------------------------------------------------------------------------------------------------------------------------------------------------------------------------------------------------------------------------------------------------------------------------------------------------------------------------------------------------------------------------|
| Journal:                      | <i>BMJ Open</i>                                                                                                                                                                                                                                                                                                                                                                                                                                                                                                                                                                                                                                                                                                                                                                                                                                                                                                                                                                     |
| Manuscript ID                 | bmjopen-2020-047210                                                                                                                                                                                                                                                                                                                                                                                                                                                                                                                                                                                                                                                                                                                                                                                                                                                                                                                                                                 |
| Article Type:                 | Protocol                                                                                                                                                                                                                                                                                                                                                                                                                                                                                                                                                                                                                                                                                                                                                                                                                                                                                                                                                                            |
| Date Submitted by the Author: | 23-Nov-2020                                                                                                                                                                                                                                                                                                                                                                                                                                                                                                                                                                                                                                                                                                                                                                                                                                                                                                                                                                         |
| Complete List of Authors:     | Bhargava, Anurag ; Yenepoya Medical College Hospital, Medicine ; Yenepoya University, Center for Nutrition Studies<br>Bhargava, Madhavi; Yenepoya Medical College Hospital, Community Medicine; Yenepoya University, Center for Nutrition Studies<br>Velayutham , Banurekha ; National Institute of Research in Tuberculosis Thiruvengadam, Kannan; National Institute of Research in Tuberculosis Watson , Basilea; National Institute of Research in Tuberculosis Kulkarni, Bharati; National Institute of Nutrition; National Institute of Nutrition,<br>Singh, Manjula; Indian Council of Medical Research, ECD<br>Dayal, Rakesh; State TB Cell<br>Pathak , Rajeev ; World Health Organization, Technical Support Network<br>Mitra, Anindya; State Tuberculosis Demonstration and Training Centre<br>Rade, Kiran ; World Health Organisation Country Office for India<br>Sachdeva, KS; India Ministry of Health and Family Welfare, National Tuberculosis Elimination Programme |
| Keywords:                     | NUTRITION & DIETETICS, Tuberculosis < INFECTIOUS DISEASES, PREVENTIVE MEDICINE, Public health < INFECTIOUS DISEASES                                                                                                                                                                                                                                                                                                                                                                                                                                                                                                                                                                                                                                                                                                                                                                                                                                                                 |
|                               |                                                                                                                                                                                                                                                                                                                                                                                                                                                                                                                                                                                                                                                                                                                                                                                                                                                                                                                                                                                     |

SCHOLARONE™  
Manuscripts

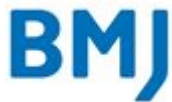

I, the Submitting Author has the right to grant and does grant on behalf of all authors of the Work (as defined in the below author licence), an exclusive licence and/or a non-exclusive licence for contributions from authors who are: i) UK Crown employees; ii) where BMJ has agreed a CC-BY licence shall apply, and/or iii) in accordance with the terms applicable for US Federal Government officers or employees acting as part of their official duties; on a worldwide, perpetual, irrevocable, royalty-free basis to BMJ Publishing Group Ltd ("BMJ") its licensees and where the relevant Journal is co-owned by BMJ to the co-owners of the Journal, to publish the Work in this journal and any other BMJ products and to exploit all rights, as set out in our [licence](#).

The Submitting Author accepts and understands that any supply made under these terms is made by BMJ to the Submitting Author unless you are acting as an employee on behalf of your employer or a postgraduate student of an affiliated institution which is paying any applicable article publishing charge ("APC") for Open Access articles. Where the Submitting Author wishes to make the Work available on an Open Access basis (and intends to pay the relevant APC), the terms of reuse of such Open Access shall be governed by a Creative Commons licence – details of these licences and which [Creative Commons](#) licence will apply to this Work are set out in our licence referred to above.

Other than as permitted in any relevant BMJ Author's Self Archiving Policies, I confirm this Work has not been accepted for publication elsewhere, is not being considered for publication elsewhere and does not duplicate material already published. I confirm all authors consent to publication of this Work and authorise the granting of this licence.

1  
2  
3 **The RATIONS (Reducing Activation of Tuberculosis by Improvement of Nutritional**  
4 **Status) study: A cluster randomized trial of nutritional support (food rations) to reduce**  
5 **TB-incidence in household contacts of patients with microbiologically confirmed**  
6 **TB-incidence in household contacts of patients with microbiologically confirmed**  
7 **pulmonary tuberculosis in communities with a high prevalence of undernutrition,**  
8 **Jharkhand, India**  
9  
10

11  
12 Anurag Bhargava,<sup>1,3,4</sup> Madhavi Bhargava<sup>2,3\*</sup>, Banurekha Velayutham<sup>5\*</sup>, Kannan  
13 Thiruvengadam<sup>6</sup>, Basilea Watson<sup>7</sup>, Bharati Kulkarni<sup>8</sup>, Manjula Singh<sup>9</sup>, Rakesh Dayal<sup>10</sup>,  
14 Rajeev Ranjan Pathak<sup>11</sup>, Anindya Mitra<sup>12</sup>, Kiran Rade<sup>13</sup>, Kuldeep Singh Sachdeva<sup>14</sup>  
15  
16

17 *\*contributed equally*  
18

19 <sup>1</sup> Department of Medicine, Yenepoya Medical College, Mangalore, India

20 <sup>2</sup> Department of Community Medicine, Yenepoya Medical College, Mangalore, India

21 <sup>3</sup> Center for Nutrition Studies, Yenepoya (Deemed to be University), Mangalore, India

22 <sup>4</sup> Department of Medicine, McGill University, Montreal, Canada

23 <sup>5</sup> Department of Clinical Research, ICMR-National Institute of Research in Tuberculosis,  
24 Chennai, India

25 <sup>6</sup> Statistics Section, Epidemiology Unit, ICMR-National Institute of Research in  
26 Tuberculosis, Chennai, India

27 <sup>7</sup> Electronic Data Processing Unit, ICMR-National Institute of Research in Tuberculosis,  
28 Chennai, India

29 <sup>8</sup> ICMR -National Institute of Nutrition, Hyderabad, India

30 <sup>9</sup> Epidemiology and Communicable Diseases Division, Indian Council of Medical Research,  
31 New Delhi, India

32 <sup>10</sup> State Tuberculosis Cell, Department of Health, Ranchi, India

33 <sup>11</sup> World Health Organization, Technical Support Network, Ranchi, India

34 <sup>12</sup> State Tuberculosis Cell, State TB Training and Demonstration Centre, Ranchi, India

35 <sup>13</sup> World Health Organization, Country Office for India, New Delhi, India

36 <sup>14</sup> National Tuberculosis Elimination Program, Central TB Division, New Delhi, India  
37  
38  
39  
40  
41  
42  
43  
44

45 **Corresponding author:** Dr Anurag Bhargava

46 **Postal Address:** Dept of Medicine, Yenepoya Medical College Campus, University Road,  
47 Deralakatte. 575018. Mangalore, Karnataka, India.  
48

49 **Email:** [anuragb17@gmail.com](mailto:anuragb17@gmail.com)  
50  
51

52 **Key Words:** food supplement, macronutrients, malnutrition, mortality, prevention  
53

54 **Word Count:** 4247  
55

56 **Protocol Version 3.1, Dated September 10, 2019**  
57  
58  
59

## Abstract

**Introduction:** India has the largest burden of cases and deaths related to TB. Undernutrition is the leading risk factor accounting for TB incidence, while severe undernutrition is a common risk factor for TB mortality in patients with TB in India. The impact of nutritional supplementation on TB incidence is unknown, while few underpowered studies have assessed its impact on TB mortality. We designed an open-label, field based cluster randomised trial to assess the impact of nutritional supplementation (with food rations) on TB-incidence in a group at higher risk of TB infection and disease, viz. household contacts (HHC) of patients with microbiologically confirmed pulmonary tuberculosis (PTB) in Jharkhand, a state with a high prevalence of undernutrition.

**Methods and Analysis:** We shall enroll 2800 adult patients with PTB of the national TB program, across 28 treatment units in 4 districts; and their approximately 11,200 eligible contacts. The sample size has 80% power to detect the primary outcome of 50% reduction in incidence of active TB in HHC over 2 years of follow-up. Patients and HHC in both the arms will undergo nutritional assessment and counseling. Patients will receive monthly food rations (supplying 1200 calories and 52 proteins) and multivitamins along with anti-tubercular treatment. The HHC in the intervention arm will receive food rations (supplying 750 calories and 23 g proteins) and multivitamins while HHC in control arm will be on usual diet. The secondary outcomes in HHC will include effects on nutritional status, non-TB infections. Secondary outcomes in patients are effects on TB mortality, adherence, adverse effects, nutritional and performance status. Sub-studies will examine micronutrient status and effects on dietary intake, body composition, muscle strength and immune function.

**Ethics and dissemination:** The Institutional Ethics Committee of ICMR-NIRT, Chennai approved the study (289/NIRT-IEC/2018). The results will be disseminated in publications and presentations.

**Trial registration number:** Clinical Trial Registry of India (CTRI/2019/08/020490).

### Strengths and Limitations of the study

- The RATIONS study is the first trial addressing undernutrition to reduce TB incidence in communities with high prevalence of poverty, undernutrition and low prevalence of HIV infection.
- It is the largest trial to evaluate the impact of nutritional support on TB mortality in a programme-based cohort of patients with pulmonary tuberculosis and a high prevalence of undernutrition.
- The follow-up period of two years will ensure detection of most cases of incident TB in household contacts and recurrence of TB in index cases.
- The quantum of food rations per participant is fixed and meets only part of the daily dietary requirements.
- Food sharing in the families in the control arm and extra food consumption from other sources can't be ruled out

## Introduction

Tuberculosis (TB) is a global public health problem leading to significant morbidity and mortality, especially in low and middle income countries. An estimated 10 million people developed TB and 1.2 million (HIV-negative) people succumbed to it in 2019.<sup>1</sup> India was the major contributor to the global TB burden with an estimated 2.6 million new cases (27% of global) and 0.4 million (35% of global) TB-deaths in HIV-negative people in 2019.<sup>1</sup>

The United Nations Sustainable Development Goals-3 (SDG-3) has a target for ending the TB epidemic by 2030 and aims to reduce TB-incidence and TB-deaths by 80% and 90% of the 2015 levels respectively.<sup>2</sup> As per the National Strategic Plan (2017-25), the Revised National Tuberculosis Control Program (RNTCP) (renamed as National Tuberculosis Elimination Program, NTEP) in India has set an ambitious target of achieving the 2030 SDG milestone by 2025, five years ahead of the global target.<sup>3</sup>

The End TB strategy will require a mix of biomedical, public health and social interventions to achieve these goals.<sup>2</sup> The strategy requires acceleration of the current decline of 1.5% to 10-17% per year.<sup>4</sup> The present biomedical approach to TB prevention based on vaccination and TB preventive treatment (TPT) has its limitations. The efficacy of BCG vaccine is limited to prevention of severe forms of childhood TB.<sup>5</sup> The TPT with isoniazid in countries like India currently covers only select groups of contacts like under-six children and people living with HIV (PLHIV).<sup>6</sup> WHO recently made a conditional recommendation of offering TPT to all house-hold contacts (HHC).<sup>7</sup> However, there are considerable logistical and technical challenges in countries with a high burden of latent TB infection (LTBI).<sup>8</sup>

### Rationale for the trial:

The End TB strategy recognizes the need for new tools, interventions and strategies to address the problem of TB-incidence and adverse outcomes.<sup>2</sup> Globally an estimated 1.7 billion people or 23% of the population have LTBI which remains latent in 90% in presence of innate and cell mediated immunity.<sup>9</sup> Risk factors like HIV, undernutrition, uncontrolled diabetes, smoking and alcohol impair immunity, leading to active TB, and act as drivers of the TB epidemic. Undernutrition is the leading cause of impaired immunity globally,<sup>10</sup> with a consistent inverse exponential relationship between nutritional status measured by body mass index (BMI) and TB-incidence.<sup>11</sup> According to the global TB report 2020, undernutrition is a

1  
2  
3 leading risk factor accounting for 2.2 million cases (19%), more than HIV and diabetes  
4 (accounting for 0.76 and 0.35 million cases respectively).<sup>1</sup> Undernutrition is also a consistent  
5 risk factor for TB-mortality, regardless of HIV infection, and drug-susceptibility.<sup>12</sup> Its  
6 prevalence was as high as 23% in women and 19% in men (BMI<18.5 kg/m<sup>2</sup>) in the most  
7 recent National Family Health Survey (NFHS-4) in India.<sup>13</sup> It is higher in the poor, rural  
8 residents and those belonging to the scheduled castes and tribes, who also suffer a high  
9 burden of TB disease.<sup>13,14</sup> The WHO has estimated that 0.6 million cases of TB in India are  
10 attributable to undernutrition,<sup>1</sup> while other studies indicate that this estimate may be higher.<sup>15</sup>  
11 A majority of Indian patients with active TB have severe levels of undernutrition  
12 (macronutrient and micronutrient) which are associated with 2-4 fold higher risk of  
13 mortality.<sup>16</sup>

14  
15  
16  
17  
18  
19  
20  
21  
22  
23 A single unit increase in BMI could reduce TB-incidence by 14%,<sup>11</sup> a modeling study has  
24 shown that TB-incidence and mortality could decline by 40-71% with nutritional  
25 interventions.<sup>17</sup> There is no randomized controlled trial on the effect of nutritional  
26 supplementation on TB-incidence. The studies on the impact of nutritional supplementation  
27 on TB mortality have been limited, small and underpowered.<sup>18</sup>

28  
29  
30  
31  
32  
33  
34  
35  
36  
37  
38  
39  
40  
41  
42  
43  
44  
45  
46  
47  
48  
49  
50  
51  
52  
53  
54  
55  
56  
57  
58  
59  
60  
The RATIONS study is a cluster randomized trial to assess the impact of nutritional  
supplementation on TB-incidence among HHC of patients with microbiologically confirmed  
pulmonary tuberculosis (PTB), living in a community with a high prevalence of  
undernutrition. They are a group at higher risk of TB infection and disease,<sup>19</sup> with a  
prevalence of 10-60 fold higher than in the general population.<sup>20</sup> TB-incidence was 4.8% in  
the HHC and 21.4% in child contacts in a previous study from Peru.<sup>21</sup> Food insecurity and  
undernutrition are strong and modifiable risk factors of TB in the HHC.<sup>22, 23</sup>

#### **OBJECTIVES (Table-1):**

**Primary objective:** To evaluate the effect of household nutritional supplementation in  
reducing TB-incidence among HHC of patients with microbiologically confirmed PTB.

**Secondary objectives in HHC:** To evaluate the effect of nutritional supplementation on  
anthropometric indicators, and non-TB infectious morbidity and mortality.

**Secondary outcomes in index cases:** To evaluate the effect of nutritional supplementation  
on adherence to treatment, mortality, frequency of adverse effects due to treatment,



1  
2  
3 performance status of patients as measured by the Eastern Cooperative Oncology Group  
4 (ECOG),<sup>24</sup> and relapse of microbiologically confirmed TB on follow-up.  
5  
6

7 **Sub-studies: Six sub-studies have been planned in a subset of index cases and HHC**  
8  
9

- 10 a) Dietary intakes: To evaluate the difference in dietary intake of calories, proteins at  
11 baseline, and at the end of treatment in a subsample of the patients in both the arms.  
12  
13 b) Micronutrients: Vitamin A (serum retinol) and 25- hydroxyvitamin D [25(OH) D]  
14 levels in a subsample of index patient and HHC at baseline.  
15  
16 c) Body composition: To evaluate the difference in body composition between patients  
17 in the two arms at baseline and six months by a multifrequency bioelectric impedance  
18 analyzer (Bodystat Quadscan 4000).  
19  
20 d) Muscle function (grip strength) in a subsample of index cases at baseline, and end of  
21 treatment using a digital handheld dynamometer.  
22  
23 e) Immune function: To evaluate select aspects of immunity in index patient and their  
24 HHC before and after treatment using the lymphocyte subsets [CD4,CD8, Natural  
25 Killer (NK) cells, B lymphocytes] and kinetics of interferon  $\gamma$  responses (by CD4 and  
26 CD8 cells) in a fourth generation-Interferon Gamma Release Assay (IGRA)  
27 (QuantiFERON-TB Gold Plus: QFT-Plus)  
28  
29 f) Qualitative study in a subset of stakeholders: A qualitative study will also be  
30 conducted in a subset of the stakeholders (patients, contacts, and field staff) at the end  
31 of the intervention period to assess the perceptions and experiences of nutrition  
32 intervention.  
33  
34  
35  
36  
37  
38  
39  
40  
41  
42  
43  
44  
45

46 **Methods and analysis**  
47

48 **Study design and oversight:**  
49

50  
51 This is a cluster randomized open-label parallel-arm, superiority trial of nutritional  
52 supplementation in households with microbiologically confirmed patients with PTB in the  
53 state of Jharkhand, Eastern India. The study will randomise 28 Tuberculosis units (TUs) in  
54 four districts (Ranchi, East-Singhbhum, West-Singhbhum and Seraikela-Kharsawan) into  
55 control and intervention arms, each with 1400 adult PTB patients. It is supported by the India  
56  
57  
58  
59  
60

1  
2  
3 TB Research Consortium of the Indian Council of Medical Research (ICMR) and  
4 implemented by the Yenepoya (Deemed to be University), in association with the National  
5 Institute for Research in Tuberculosis (ICMR-NIRT), and National Institute of Nutrition  
6 (ICMR-NIN). The enrolment began on the August 16, 2019.  
7  
8  
9

10  
11 Study setting: Under the NTEP, each district has one District TB centre and there are sub-  
12 district administrative units called TUs. The population is predominantly rural (75%) and  
13 indigenous communities classified as “scheduled tribes” (STs) who comprise 28% of the  
14 population (national-8%) and are historically disadvantaged groups with regard to social,  
15 economic and health indicators. According to NFHS-4, the prevalence of undernutrition in  
16 Jharkhand was 23.8% and 31.6% in adult men and women respectively, significantly higher  
17 than the national average.<sup>13</sup> A total of 44,000 TB cases were notified in the year 2017 when  
18 this trial was proposed.<sup>25</sup>  
19  
20  
21  
22  
23  
24  
25

### 26 **Eligibility criteria (Table-2)**

27  
28 Inclusion criteria: Adult patients ( $\geq 18$  years) with microbiologically confirmed PTB  
29 (irrespective of drug sensitivity) will constitute the index cases and will be eligible to enrol in  
30 the study. The HHC will be persons who have lived in the same house (and eating from the  
31 same kitchen), for one or more nights or for frequent or extended periods during the day with  
32 the index case during the preceding three months.  
33  
34  
35  
36

37 Exclusion criteria: An index case with no eligible HHC and any HHC currently on treatment  
38 for TB will be excluded.  
39  
40  
41

### 42 **Study interventions:**

43  
44 **Nature and quantity:** The study intervention includes macronutrients and micronutrient  
45 supplementation along with nutritional counseling as per national guidelines.<sup>26</sup> The index  
46 patients (in both arms) and the HHC (in the intervention arm) will receive a food basket and a  
47 recommended daily allowance of vitamins and micronutrients every month, as described in  
48 **Table-3**. This will be either delivered by the study staff or may be picked up from a depot as  
49 per the participant preference.  
50  
51  
52  
53

54  
55 **Frequency and duration:** The food basket will be provided for six months for new patients  
56 and 12 months for patients with MDR-TB (and their HHC in intervention arm). Extension of  
57  
58  
59  
60

1  
2  
3 the intervention period to 12 months, for a patient with non-MDR-TB will be considered if  
4 there is evidence of undernutrition ( $BMI < 18.5 \text{ kg/m}^2$ ) in the index case even at the end of six  
5 months. Extension of rations to a HHC will be considered if an adult contact has a  $BMI < 16$   
6  $\text{kg/m}^2$ ; children ( $< 10$  years) have weight-for-age z-score  $< -2SD$  and adolescents (10-18 years)  
7 have  $BMI\text{-for-age}$  z-scores  $< -2SD$ .  
8  
9  
10  
11

12 **Nutritional counselling and assessing adherence:** The patients and the HHC will be  
13 counselled about the importance of a balanced diet for the nutritional recovery of the patient  
14 and the protection of the health status of the family. The families will be instructed about the  
15 optimal utilisation of the food rations in locally acceptable food recipes. The field staff will  
16 undertake follow-up visits to monitor weight gain (a proxy indicator for adherence) and  
17 check the empty packets of the milk powder as an indicator of consumption by the patient.  
18  
19  
20  
21  
22  
23

#### 24 **Co-interventions permitted during the trial**

25  
26 The patients as well as the HHC will continue to access public distribution system,  
27 supplementary feeding programs (Integrated Child Development Services Scheme, mid-day  
28 meals) as usual and additional INR 500/month as Direct Benefit Transfer availed by patients  
29 with TB in India. The eligible under-six children and those with HIV infection who have  
30 been advised by the NTEP staff to take chemoprophylaxis with isoniazid after an evaluation  
31 will continue to do so.  
32  
33  
34  
35  
36  
37

#### 38 **Risk assessment and referral**

39  
40 The patients will be evaluated for nutritional status, oxygen saturation, blood pressure and  
41 presence of complications at baseline and at follow-up. Patients with severe undernutrition  
42 with edema, extremely severe undernutrition ( $BMI < 14 \text{ kg/m}^2$ ), breathlessness or low oxygen  
43 saturation ( $SpO_2 < 94$ ) will be referred for inpatient care as per national guidelines.<sup>26</sup>  
44  
45  
46  
47

#### 48 **Randomization and intervention allocation:**

49  
50 This is an open label trial, the participants and field staff, are not blinded after assignment.  
51 All the TUs from the selected districts were line-listed (supplementary file) and randomized  
52 equally to both the arms by computer generated random numbers using restricted  
53 randomization by the statistician at ICMR-NIRT, Chennai. The cluster allocation was kept  
54  
55  
56  
57  
58  
59  
60

1  
2  
3 confidential until the end of training of the field staff and the TUs were ready for  
4 implementation.  
5  
6

### 7 **Enrolment of index cases and HHC**

8  
9  
10 **Figure-1** describes the study flow. Consecutive patients diagnosed with microbiologically  
11 confirmed PTB in selected TUs will be enrolled after due consent process, during a 6-12  
12 month period. Information about the study will be given to the HHC during a home visit by  
13 the trial staff and enrolled after elicitation of voluntary written informed consent. The need  
14 for adherence to treatment and food rations, cooperation with study procedures, the stability  
15 of residence and the willingness to permit home visits will be discussed with the index cases  
16 and HHC during enrolment.  
17  
18  
19  
20  
21  
22

### 23 **Baseline evaluation of index cases and HHC:**

24  
25 The study procedures at baseline and follow-up are denoted in **Table-4**. Demographic  
26 characteristics including gender, occupation, caste, marital status, education, socio-economic  
27 assessment with an asset score, education will be noted. Presence of self-reported risk factors  
28 such as diabetes, alcohol consumption and tobacco use, family/past history of TB will also be  
29 recorded.  
30  
31  
32  
33  
34

35 **Clinical examination of index cases:** Weight will be measured with a digital weighing scale  
36 (SECA 803) with accuracy of 100 gm, and height using a portable stadiometer (SECA 213)  
37 with accuracy of 0.1 cm using standard procedures. Mean of two measurements of weight  
38 will be taken for calculation of BMI. Mid-upper arm circumference (MUAC) will be  
39 measured to the nearest of 0.1 cm on the non-dominant arm, if the patient is unable to stand.  
40 Presence of edema, blood pressure using a digital instrument (OMRON) and oxygen  
41 saturation using pulse oximeter will be noted. Assessment of performance status will be done  
42 using ECOG scale as described in **Table-5**.<sup>24</sup>  
43  
44  
45  
46  
47  
48

49 **Clinical examination in contacts:** This will consist of anthropometric measurements like  
50 weight, height, MUAC (if unable to stand and in under-five), presence of edema and BCG  
51 scar.  
52  
53  
54

55 **Laboratory evaluation of index cases:** The results of the sputum smear microscopy,  
56 cartridge based nucleic acid amplification test (CB-NAAT) - Gene Xpert MTB/RIF test,  
57  
58  
59  
60

1  
2  
3 blood glucose and HIV tests (if available) will be retrieved from the NTEP records.  
4 Hemoglobin will be measured during the home visit using HemoCue Hb 201<sup>+</sup> using standard  
5 procedures and precautions. Chest X-ray (CXR) of patients at baseline will be done wherever  
6  
7 feasible.  
8  
9

10  
11 **Laboratory evaluation of HHC:** Symptom screening for TB will be done in all HHC and  
12 CXR will be done wherever feasible as per the NTEP guidelines.<sup>6</sup> In case of symptoms of  
13 presumptive TB or an abnormal CXR, the HHC will be referred for sputum examination.  
14 Children with symptoms/abnormal CXR will be referred for further evaluation by sputum  
15 smear and CB-NAAT (if cough is productive) and induced sputum/gastric aspirate, if unable  
16 to produce sputum at a referral hospital.  
17  
18  
19  
20  
21

### 22 **Follow-up of index cases and HHC:**

23  
24 The enrolled index cases and their HHC will be followed-up for two years after the diagnosis  
25 of the index case. Jharkhand is a state with potential seasonal labor migration from rural  
26 areas. All attempts (including telephonic contact) will be made to retain follow-up in case of  
27 temporary migration with an in-person visit on their return. Participants will be termed as lost  
28 to follow-up if in-person or telephonic contact is not made for  $\geq 2$  months in the intervention  
29 period; or for  $\geq 6$  months in the follow-up period. All participants lost to follow-up will be  
30 approached for an end of study evaluation to ascertain information on the primary and  
31 relevant secondary outcomes.  
32  
33  
34  
35  
36  
37  
38

39 The schedule of follow-up and assessments is described in **Table-4**. Evaluation will be done  
40 for current symptoms, any adverse effect related to treatment, adherence to treatment and  
41 rations. All HHC will be evaluated for symptoms of active TB on each visit, consumption of  
42 rations (in intervention arm), and review of non-TB infectious morbidity and mortality based  
43 on symptoms, hospitalization, or death.  
44  
45  
46  
47  
48

49 Patients will undergo repeat sputum examination on follow-up as per NTEP guidelines.  
50 Contacts that develop any symptoms of active TB (PTB or EPTB) will undergo appropriate  
51 investigations.  
52  
53

54 The cases of active TB in HHC will be classified as co-prevalent or incident according to the  
55 time of diagnosis of the index case. A co-prevalent case is a HHC diagnosed with active TB  
56 (microbiologically confirmed active TB or as clinically diagnosed tuberculosis) at the  
57  
58  
59  
60

1  
2  
3 baseline, or within two month of the baseline screening and evaluation of the HHC. An  
4 incident case is a new case of TB in a HHC (microbiologically confirmed active TB or as  
5 clinically diagnosed) that was diagnosed more than two months following the initial negative  
6 screening and evaluation. The definition of microbiologically confirmed case and clinically  
7 diagnosed cases is as per **Table-6**.  
8  
9  
10  
11

### 12 **Qualitative study about the nutritional intervention**

13  
14  
15 We will use a phenomenological approach to generate qualitative data through the in-depth  
16 interview of TB patients and their HHC. The participants will be purposively selected till  
17 conceptual saturation and triangulation is reached, and will be interviewed using topic guides  
18 prepared in line with the study objectives. Interviews will be tape-recorded, transcribed  
19 verbatim, and translated to English. Open Code software will be used to facilitate analysis.  
20 This sub-study will be conducted at the end of the intervention period.  
21  
22  
23  
24  
25

### 26 **Criteria for discontinuation or withdrawal of study participants**

27  
28  
29 Study participants will be free to withdraw at any time during the trial. Other reasons for  
30 discontinuation are non-consumption of rations, non-availability for follow-up and  
31 development of active disease (in HHC). Discontinuation may also occur if the study  
32 sponsors decide to stop or cancel the study.  
33  
34  
35

### 36 **Study outcomes**

37  
38  
39 The primary outcome in HHC is the difference in number of incident cases of active TB (all  
40 forms) in the two arms by active case finding over a follow-up period of two years. The  
41 secondary outcomes are improvement in the nutritional indicators over six months, frequency  
42 of malaria, diarrhea, lower respiratory tract infection, hospitalization with fever of any cause,  
43 or death with fever of any cause less than 15 days in duration in both the trial arms.  
44  
45  
46  
47  
48

49 The secondary outcomes in the index cases are successful treatment completion, TB related  
50 deaths, improvement in performance status, adverse effects, and recurrence of TB during two  
51 years follow-up. The ascertainment of primary outcomes of incident TB in contacts is by  
52 NTEP program staff (not part of the trial team).  
53  
54  
55

### 56 **Participant timeline:**

1  
2  
3 The trial has a preparatory phase of three months for site selection, staff recruitment and  
4 training, and preparation of manual of procedures. The intervention phase will be six months  
5 for drug-susceptible cases and 12 months in the MDR-TB. The follow-up phase will continue  
6  
7 for two years from the initiation of treatment.  
8  
9

### 10 **Sample size estimation**

11  
12  
13 The estimated incidence rate of PTB in the general population in India is 217/100,000  
14 population (0.208 %).<sup>4</sup> The incidence rate-ratio of TB in HHC is 15.9 (IQR, 2.6-21.4)  
15 compared to the general population, translating into 4% incidence in the HHC.<sup>19</sup> Assuming a  
16 higher burden of TB and undernutrition in India, and recent emerging evidence of  
17 significantly higher risk of TB disease following infection in close contacts,<sup>27</sup> we considered  
18 TB-incidence in HHC to be 5% over the study period. We assume 50% reduction in TB-  
19 incidence at household level with intervention.<sup>28</sup>  
20  
21  
22  
23  
24  
25

26 Our sample size considers design effect at three levels; the TU level, the families of index  
27 cases and finally their HHC.<sup>29</sup> We assumed approximately 100 index cases (80-120) and their  
28 families in a cluster per annum, a correlation coefficient of 0.2 for the outcome in HHC and  
29 0.01 between members of the same cluster,<sup>19</sup> and thus a design effect of 6.75. Thus a sample  
30 size of 28 clusters with 2800 patients and approximately 11,200 contacts equally distributed  
31 in both the arms would have 80% power to detect 50% reduction of TB-incidence in  
32 intervention arm with a type-1 error of 5%.  
33  
34  
35  
36  
37  
38

39 The sub-study sample sizes were estimated based on the assumptions related to the objective  
40 of the sub-study. The sample size of 250 cases (125/arm) and 250 contacts (125/arm) was  
41 based on the prevalence of multiple vitamin deficiencies in patients with PTB,<sup>30</sup> and the  
42 prevalence of Vitamin D deficiency in apparently healthy individuals in India.<sup>31</sup>  
43  
44  
45  
46

47 A sample size of 352 contacts (176/arm) was assumed to be needed to detect a 10%  
48 difference in mean CD4 counts in the contacts of the two arms after six months of  
49 intervention, with 90% power. This proportion is about 3% of the HHC and we will enroll a  
50 similar 3% of the index cases (50/arm) to assess determine the immune function at baseline  
51 and after intervention in them.  
52  
53  
54  
55

56 The sample size for the dietary intake sub-study assumes a standard deviation of 525  
57 KCalories, over a wide range of caloric intakes.<sup>32</sup> Assuming a mean difference in caloric  
58  
59  
60



1  
2  
3 intake between both the arms as 400 KCalories and 20% loss to follow-up, we will enroll 45  
4 contacts and 45 patients in each arm.  
5  
6

### 7 **Data collection, management**

8  
9  
10 The data will be collected by field investigators working in close collaboration with the  
11 NTEP staff. Study data will be collected and managed using REDCap, an electronic data  
12 capture tools<sup>33</sup> hosted at ICMR-NIRT. The data capture will be done real time using a  
13 handheld device, will be subjected to range and logic checks and will be monitored by the  
14 project technical team. A periodic quality check will be performed for accuracy and  
15 completeness by the data management team at ICMR-NIRT, which will minimize missing  
16 data. Appropriate imputation methods will be used for missing values in the analysis if  
17 required. The final dataset will be accessible to the investigators based in Yenepoya (deemed  
18 to be University) and ICMR-NIRT and will be deposited in electronic format with the trial  
19 sponsor, ICMR, at the end of the study.  
20  
21  
22  
23  
24  
25  
26  
27

28 All essential trial documents, consent forms will be stored under lock and key at the  
29 recruitment site under the supervision of investigators. Electronic data will be password  
30 protected and the records will be retained for a period of five years after completion of the  
31 study.  
32  
33  
34

35 We will constitute a data safety management board (DSMB) comprising of subject experts in  
36 clinical trials, TB and nutrition along with independent biostatistician and ethicist.  
37  
38  
39

40 Apart from the regular monitoring by the project team, there is periodic reporting to the  
41 ICMR, to the IEC of ICMR-NIRT, the trial advisory committee and the DSMB.  
42  
43  
44

### 45 **Data analysis:**

46 The primary outcome is TB incidence among contacts, expressed as events per 100,000  
47 person-months of follow-up. Follow-up is defined as time from date of randomization until  
48 the earliest endpoint, i.e. documented TB disease or censoring (death, loss to follow-up or  
49 end of the study).  
50  
51  
52  
53

54 Cox proportional hazards model, accounting for varying follow-up times and clustering  
55 effect, will be used to compare the rate of progression of TB infection to disease among  
56 contacts between the arms and to assess its association with risk factors. Unadjusted and  
57  
58  
59  
60



1  
2  
3 adjusted hazard ratios along with their 95% confidence intervals will be reported. The crude  
4 effect of the intervention will be calculated using Kaplan-Meier survival plots and compared  
5 using the log rank test.  
6  
7

8  
9 The primary analysis will be intention to treat. Per-protocol analysis will also be done. The  
10 models will be adjusted for relevant risk factors (age, smoking, diabetes, duration of  
11 exposure) during the sensitivity analysis.  
12  
13

14  
15 The secondary outcomes of change in weight and z-scores in patients and HHC, and the  
16 performance status in patients, will be compared using unpaired and paired t-tests and  
17 Bonferroni correction for multiple comparisons. Linear mixed regression models adjusted for  
18 age, gender, TU, caste, asset score, family size, and baseline weight will be done.  
19  
20  
21

22  
23 The secondary outcomes of frequency of non-TB morbidities and deaths due to infections in  
24 the HHC, and the frequency of deaths, adverse effects, defaults, relapse in the index cases in  
25 the two arms will be compared using the chi-square test and Cox proportional hazards  
26 regression for time to first event.  
27  
28  
29

30  
31 The patients enrolled in the sub-studies will be compared in their baseline characteristics as  
32 these have been drawn by non-random sampling of patients from the main trial. The changes  
33 in dietary intake of calories and proteins, body composition parameters and lymphocyte will  
34 be assessed among index and contacts. Interactions between treatment and change in  
35 nutritional and body composition indicators will be tested using likelihood ratio tests.  
36  
37  
38

39  
40 The effect of subgroups will be analysed based on age, gender, caste, residence, BMI, asset  
41 score, and possession of below poverty line card, alcohol use, and family history of TB. A p  
42 value <0.05 (two-tailed) will be considered statistically significant. All data will be analysed  
43 using STATA version 16.1 (StataCorp, Texas, USA).  
44  
45  
46

47  
48 Interim analysis will be performed on attaining 50% of outcomes in the control arm  
49 (approximately 230 cases) with a p-value<0.0054 as statistically significant. The final  
50 analysis will be done at the end of attainment of planned sample size and completion of  
51 follow-up, considering a p-value <0.0492 as statistically significant.  
52  
53  
54

## 55 **Harm**

56  
57  
58  
59  
60

1  
2  
3 The intervention involves locally consumed food items which are part of the daily diet and  
4 hence no specific adverse events are expected. Patients who have lactose intolerance will be  
5 offered alternatives. The possibility of 're-feeding syndrome' in severely undernourished  
6 patients will be prevented by training the field staff to offer a graded increase in food intake  
7 in such patients.  
8  
9

10  
11  
12 **Ethics, participant information and consent:** Ethics clearance has been obtained from  
13 Institutional Ethics Committee of ICMR-NIRT, Chennai (NIRT-IEC no: 2018020), to which  
14 all the amendments of the protocol will be communicated. Patients and their HHC who are  
15 enrolled in the study will receive a detailed 'Participant Information Sheet' in local language  
16 before administering the informed consent. A separate consent form will be used for the adult  
17 participants enrolled in the sub-study on micronutrient status and immune function. No blood  
18 specimen will be stored for any future use. A unique numerical code will be allocated to each  
19 participant for purpose of their identification and for maintaining confidentiality. Personal  
20 identifiers will be deleted in the final research database for analysis. All forms with personal  
21 identifiers will be under lock and key with the trial team.  
22  
23  
24  
25  
26  
27  
28  
29

### 30 **Responsibility for ancillary care during the trial**

31  
32  
33 Any index case or HHC found to have an acute illness other than TB during the follow-up  
34 visits will be facilitated by the field staff to reach the nearest government health set-up.  
35  
36

### 37 **Patient and public involvement statement**

38  
39  
40 Patients were not directly involved in the development of the research question. The  
41 components of food basket were discussed with community health workers during the  
42 preparatory phase of the trial. The training of the field staff involved interaction with TB  
43 survivors and two of the field staff in the trial are TB-survivors.  
44  
45  
46

### 47 **Dissemination Plan**

48  
49  
50 The impact of nutritional support on TB incidence and outcomes in this trial will be of  
51 relevance to NTEP, India. The results will be disseminated through publications, conference  
52 presentations and briefs for the program managers, Jharkhand department of Health, policy  
53 makers and other stakeholders. We intend to share the published results in simple language  
54 with the participants and community leaders.  
55  
56  
57  
58  
59  
60

### **Trial status**

The trial was started on 16<sup>th</sup> of August 2019 after trial registration (CTRI/2019/08/020490) and an intensive two weeks training of 56 field staff, two project consultants and one project director by State NTEP staff, nutritionist, and specialists in TB, ethicist, TB-champions, communication experts and social scientists. We have enrolled 2488 index cases and 9125 HHC in the trial as of 31<sup>st</sup> of October, 2020.

### **Author contributions**

AB conceived the research question. AB, BR, MB, TK, BK designed the study protocol and drafted the manuscript. BW, MS, RD, AM, RRP, KR, KSS reviewed the study protocol and provided critical intellectual content. All authors carefully read and approved the final version of the manuscript.

### **Funding statement:**

The RATIIONS study is supported by the India Tuberculosis Research Consortium, Indian Council of Medical Research, New Delhi, India vide grant no. 5/8/5/57/TB Consortium/Call India Project/2017/ECD-1. The funder has no role in the study design and writing of the protocol, and will not have any role in collection, management, analysis, and interpretation of data; the writing and the decision to submit any future reports for publication.

### **Competing interests statement:**

The authors state that they have no competing interests to declare.

### **Figure 1: Study flow for the RATIIONS Trial**

**References:**

1. Global Tuberculosis Report 2020. Geneva: World Health Organization; 2020.
2. World Health Organization. Implementing the End TB strategy: The essentials. WHO/HTM/TB/2015.31. Geneva: WHO; 2015.
3. National Strategic Plan for TB Elimination (2017-2025). New Delhi Central TB Division, Ministry of Health and Family Welfare, Government of India; 2017.
4. Global Tuberculosis Report 2016. Geneva: World Health Organization; 2016.
5. Mangtani P, Abubakar I, Ariti C, Beynon R, Pimpin L, Fine PE, et al. Protection by BCG vaccine against tuberculosis: a systematic review of randomized controlled trials. *Clin Infect Dis*. 2014;58(4):470-80.
6. Revised National TB Control Programme :Technical and Operational Guidelines for Tuberculosis Control in India. New Delhi: Central TB Division, Ministry of Health and Family Welfare; 2016.
7. WHO consolidated guidelines on tuberculosis. Module 1: prevention – tuberculosis preventive treatment. Geneva: World Health Organization; 2020.
8. Paton NI, Borand L, Benedicto J, Kyi MM, Mahmud AM, Norazmi MN, et al. Diagnosis and management of latent tuberculosis infection in Asia: Review of current status and challenges. *Int J Infect Dis*. 2019;87:21-9.
9. Houben RM, Dodd PJ. The Global Burden of Latent Tuberculosis Infection: A Re-estimation Using Mathematical Modelling. *PLoS Med*. 2016;13(10):e1002152.
10. Bhargava A. Undernutrition, nutritionally acquired immunodeficiency, and tuberculosis control. *BMJ* [Internet]. 2016; 355. Available from: <http://www.bmj.com/content/bmj/355/bmj.i5407.full.pdf>.
11. Lonnroth K, Williams BG, Cegielski P, Dye C. A consistent log-linear relationship between tuberculosis incidence and body mass index. *Int J Epidemiol*. 2010;39(1):149-55.
12. Waitt CJ, Squire SB. A systematic review of risk factors for death in adults during and after tuberculosis treatment. *The International Journal of Tuberculosis and Lung Disease*. 2011;15(7):871-85.
13. International Institute for Population Sciences, ICF. National Family Health Survey (NFHS-4), 2015–16: India. IIPS Mumbai, India; 2017.

14. Mazumdar S, Satyanarayana S, Pai M. Self-reported tuberculosis in India: evidence from NFHS-4. *BMJ global health*. 2019;4(3):e001371.
15. Bhargava A, Benedetti A, Oxlade O, Menzies D, Pai M. Undernutrition and the incidence of tuberculosis in India: National and subnational estimates of the population-attributable fraction related to undernutrition. *Natl Med J India*. 2014;27(3):128-33.
16. Bhargava A, Chatterjee M, Jain Y, Chatterjee B, Kataria A, Bhargava M, et al. Nutritional status of adult patients with pulmonary tuberculosis in rural central India and its association with mortality. *PLoS One*. 2013;8(10):e77979.
17. Oxlade O, Huang CC, Murray M. Estimating the Impact of Reducing Under-Nutrition on the Tuberculosis Epidemic in the Central Eastern States of India: A Dynamic Modeling Study. *PLoS One*. 2015;10(6):e0128187.
18. Grobler L, Nagpal S, Sudarsanam TD, Sinclair D. Nutritional supplements for people being treated for active tuberculosis. *Cochrane Database Syst Rev*. 2016(6):CD006086.
19. Fox GJ, Barry SE, Britton WJ, Marks GB. Contact investigation for tuberculosis: a systematic review and meta-analysis. *Eur Respir J*. 2013;41(1):140-56.
20. Enarson DA, Fanning EA, Allen EA. Case-finding in the elimination phase of tuberculosis: high risk groups in epidemiology and clinical practice. *Bull Int Union Tuberc Lung Dis*. 1990;65(2-3):73-4.
21. Grandjean L, Gilman RH, Martin L, Soto E, Castro B, Lopez S, et al. Transmission of Multidrug-Resistant and Drug-Susceptible Tuberculosis within Households: A Prospective Cohort Study. *PLoS Med*. 2015;12(6):e1001843; discussion e.
22. Jubulis J, Kinikar A, Ithape M, Khandave M, Dixit S, Hotalkar S, et al. Modifiable risk factors associated with tuberculosis disease in children in Pune, India. *Int J Tuberc Lung Dis*. 2014;18(2):198-204.
23. O. Morán-Mendoza, S. A. Marion, K. Elwood, D. Patrick, FitzGerald JM. Risk factors for developing tuberculosis: a 12-year follow-up of contacts of tuberculosis cases. *International Journal of Tuberculosis and Lung Disease*. 2010;14(9):1112-9.
24. de Valliere S, Barker RD. Poor performance status is associated with early death in patients with pulmonary tuberculosis. *Trans R Soc Trop Med Hyg*. 2006;100(7):681-6.

- 1
  - 2
  - 3
  - 4
  - 5
  - 6
  - 7
  - 8
  - 9
  - 10
  - 11
  - 12
  - 13
  - 14
  - 15
  - 16
  - 17
  - 18
  - 19
  - 20
  - 21
  - 22
  - 23
  - 24
  - 25
  - 26
  - 27
  - 28
  - 29
  - 30
  - 31
  - 32
  - 33
  - 34
  - 35
  - 36
  - 37
  - 38
  - 39
  - 40
  - 41
  - 42
  - 43
  - 44
  - 45
  - 46
  - 47
  - 48
  - 49
  - 50
  - 51
  - 52
  - 53
  - 54
  - 55
  - 56
  - 57
  - 58
  - 59
  - 60
25. India TB Report 2018. New Delhi: Central TB Division, Ministry of Health and Family Welfare, Government of India.; 2018.
26. Guidance document on nutritional care and support for patients with tuberculosis in India. Central TB Division, Ministry of Health and Family Welfare, Government of India; 2017.
27. Trauer JM, Moyo N, Tay EL, Dale K, Ragonnet R, McBryde ES, et al. Risk of Active Tuberculosis in the Five Years Following Infection . . . 15%? *Chest*. 2016;149(2):516-25.
28. Bhargava A, Pai M, Bhargava M, Marais BJ, Menzies D. Can social interventions prevent tuberculosis?: the Papworth experiment (1918-1943) revisited. *Am J Respir Crit Care Med*. 2012;186(5):442-9.
29. Teerenstra S, Lu B, Preisser JS, van Achterberg T, Borm GF. Sample size considerations for GEE analyses of three-level cluster randomized trials. *Biometrics*. 2010;66(4):1230-7.
30. Oh J, Choi R, Park HD, Lee H, Jeong BH, Park HY, et al. Evaluation of vitamin status in patients with pulmonary tuberculosis. *J Infect*. 2017;74(3):272-80.
31. Beloyartseva M, Mithal A, Kaur P, Kalra S, Baruah MP, Mukhopadhyay S, et al. Widespread vitamin D deficiency among Indian health care professionals. *Archives of osteoporosis*. 2012;7:187-92.
32. Hall JC. A method for the rapid assessment of sample size in dietary studies. *Am J Clin Nutr*. 1983;37(3):473-7.
33. Harris PA, Taylor R, Thielke R, Payne J, Gonzalez N, Conde JG. Research electronic data capture (REDCap)--a metadata-driven methodology and workflow process for providing translational research informatics support. *Journal of biomedical informatics*. 2009;42(2):377-81.

**Table-1: Objectives of the RATIONS trial and the outcome variables**

| Objective                                                                                                                           | Outcome variables                                                                                                                                                                  | Index case | HHC |
|-------------------------------------------------------------------------------------------------------------------------------------|------------------------------------------------------------------------------------------------------------------------------------------------------------------------------------|------------|-----|
| <b>Primary Objective</b>                                                                                                            |                                                                                                                                                                                    |            |     |
| Effect of household nutritional supplementation in reducing TB incidence among HHC of patients with microbiologically confirmed PTB | Difference in number of incident cases of active TB (all forms) in the two arms detected by active case finding over a follow-up period of two years after diagnosis of index case |            | ✓   |
| <b>Secondary Objectives</b>                                                                                                         |                                                                                                                                                                                    |            |     |
| Effect of nutritional supplementation on anthropometric indicators over 6 months                                                    | Anthropometric indicators such as weight and Body Mass Index                                                                                                                       | ✓          | ✓   |
| Non-TB infectious morbidity and mortality in HHC in both the arms                                                                   | Malaria, diarrhea, lower respiratory tract infection, hospitalization with fever of any cause, or death with fever of any cause <15 days in duration                               |            | ✓   |
| Adherence to anti-TB therapy                                                                                                        | Proportion completing the therapy successfully                                                                                                                                     | ✓          |     |
| Mortality during treatment                                                                                                          | Proportion of index cases who died during treatment                                                                                                                                | ✓          |     |
| Adverse effects                                                                                                                     | Severe adverse effects with TB drugs                                                                                                                                               | ✓          |     |
| Recurrence of TB within 2 years after cure                                                                                          | Relapse rate of microbiologically confirmed TB                                                                                                                                     | ✓          |     |
| Performance status                                                                                                                  | Change in ECOG scale at 1,2 and 6 months compared to baseline                                                                                                                      | ✓          |     |
| <b>Dietary Substudy</b>                                                                                                             |                                                                                                                                                                                    |            |     |
| Evaluate the difference in dietary intake of calories and proteins                                                                  | Calorie and protein intake at baseline, and end of treatment in intervention and control arms                                                                                      | ✓          | ✓   |
| <b>Micronutrient substudy</b>                                                                                                       |                                                                                                                                                                                    |            |     |
| Assess Vitamin A and D [25(OH)D]                                                                                                    | Level of vitamin A and D at baseline                                                                                                                                               | ✓          | ✓   |

|                                                      |                                                                                                                                                                      |   |   |
|------------------------------------------------------|----------------------------------------------------------------------------------------------------------------------------------------------------------------------|---|---|
| levels                                               |                                                                                                                                                                      |   |   |
| <b>Body composition substudy</b>                     |                                                                                                                                                                      |   |   |
| Evaluation of body composition                       | Estimate fat-free mass, fat mass, and other Bioimpedance analysis parameters at baseline, and 6 months after treatment                                               | ✓ | ✓ |
| <b>Substudy on grip strength</b>                     |                                                                                                                                                                      |   |   |
| Evaluate muscle strength using hand grip dynamometer | Grip strength at baseline and 6 months                                                                                                                               | ✓ |   |
| <b>Substudy of immune function</b>                   |                                                                                                                                                                      |   |   |
| Evaluate cellular immunity in patients and HHC       | Lymphocyte subsets (CD4,CD8, Natural Killer cells, B lymphocytes), 4 <sup>th</sup> generation Interferon Gamma Release Assay (IGRA) at baseline and end of treatment | ✓ | ✓ |

HHC=household contact; PTB=pulmonary tuberculosis; MDR=multi-drug resistant tuberculosis; ECOG=eastern co-operative oncology group

**Table-2: Eligibility criteria for RATIONS trial participants**

| <b>Index cases</b>                                                         | <b>Household contacts (HHC)</b>                                                                                                                                                                     |
|----------------------------------------------------------------------------|-----------------------------------------------------------------------------------------------------------------------------------------------------------------------------------------------------|
| <b>Inclusion Criteria</b>                                                  |                                                                                                                                                                                                     |
| Patients $\geq 18$ years with microbiologically confirmed pulmonary TB     | Persons living in the same house, eating from same kitchen as index case for $\geq$ one night or for frequent or extended periods during the day during the 3 months before diagnosis in index case |
| <b>Exclusion criteria</b>                                                  |                                                                                                                                                                                                     |
| Non eligible HHC                                                           | Current smear or GeneXpert or LPA or culture confirmed TB                                                                                                                                           |
| Time interval between initiation of treatment and enrolment is $> 14$ days | Clinically diagnosed pulmonary or extra-pulmonary TB and currently on treatment                                                                                                                     |

LPA = Line probe assay



**Table-3: Nutritional supplementation in the RATIONS trial**

|                                                                | <b>Intervention arm</b>                                                                                                                                                                   | <b>Control arm</b>                                                                                                                                                                        |
|----------------------------------------------------------------|-------------------------------------------------------------------------------------------------------------------------------------------------------------------------------------------|-------------------------------------------------------------------------------------------------------------------------------------------------------------------------------------------|
| Index case*, quantity per person per month                     | Nutritional counselling<br>5 kg of rice<br>3 kg roasted Bengal gram powder (locally called as <i>sattu</i> )<br>1.5 kg of milk powder<br>500 ml vegetable oil<br>One RDA of micronutrient | Nutritional counselling<br>5 kg of rice<br>3 kg roasted Bengal gram powder (locally called as <i>sattu</i> )<br>1.5 kg of milk powder<br>500 ml vegetable oil<br>One RDA of micronutrient |
| Household contact <sup>§</sup> , quantity per person per month | Nutritional counselling<br>5 kg rice<br>1.5kg pulses (split pigeon peas)<br>One RDA of micronutrient per adult/adolescent HHC<br>Half of this amount for children less than 10 years.     | Nutritional counselling<br>Usual food assistance available to eligible households through public distribution system                                                                      |

RDA = Recommended Dietary Allowance; \* approximately 1200 Kcal of energy and 52 gm proteins per day. § approximately 750 Kcal of energy and 23 gm of proteins per day.

**Table 4: Schedule of enrolment, assessments at baseline and follow-up in the RATIONS trial**

|   | Investigations                                                                                             | Base-line | M1 | M2 | M3 | M4 | M5 | M6 | M7 | M8 | M9 | M10 | M11 | M12 | M15 | M18 | M21 | M24 |
|---|------------------------------------------------------------------------------------------------------------|-----------|----|----|----|----|----|----|----|----|----|-----|-----|-----|-----|-----|-----|-----|
|   | <b>In index cases</b>                                                                                      |           |    |    |    |    |    |    |    |    |    |     |     |     |     |     |     |     |
| 1 | Informed consent                                                                                           | X         |    |    |    |    |    |    |    |    |    |     |     |     |     |     |     |     |
| 2 | Demography, socio-economic status, co-morbidities, household characteristics, access to PDS                | X         |    |    |    |    |    |    |    |    |    |     |     |     |     |     |     |     |
| 3 | Clinical Evaluation                                                                                        | X         | X  | X  | X  | X  | X  | X  | X  | X  | X  | X   | X   | X   | X   | X   | X   | X   |
| 4 | Anthropometry (Height, Weight, MUAC), SpO <sub>2</sub> pedal edema                                         | X         | X  | X  | X  | X  | X  | X  | X  | X  | X  | X   | X   | X   | X   | X   | X   | X   |
| 5 | *Laboratory evaluation RBS, HIV, Hb                                                                        | X         |    |    |    |    |    |    |    |    |    |     |     |     |     |     |     |     |
| 6 | Compliance to Nutritional supplement in new cases, (12 mo. in MDR-TB)                                      | X         | X  | X  | X  | X  | X  | X  | X  | X  | X  | X   | X   | X   |     |     |     |     |
| 7 | Performance status (modified ECOG Scale)                                                                   | X         | X  | X  |    |    |    | X  | X  | X  | X  | X   | X   | X   |     |     |     |     |
| 8 | *CB NAAT                                                                                                   | X         |    |    |    |    |    |    |    |    |    |     |     |     |     |     |     |     |
| 9 | *CXR                                                                                                       | X         |    |    |    |    |    | X  |    |    |    |     |     |     |     |     |     |     |
|   | <b>In subsample of index cases</b>                                                                         |           |    |    |    |    |    |    |    |    |    |     |     |     |     |     |     |     |
| 1 | Dietary recall of calories, protein intake                                                                 | X         |    |    |    |    |    | X  |    |    |    |     |     |     |     |     |     |     |
| 2 | Body composition (By BIA)                                                                                  | X         |    |    |    |    |    | X  |    |    |    |     |     |     |     |     |     |     |
| 3 | Micronutrient estimation(Vit. A, D)                                                                        | X         |    |    |    |    |    |    |    |    |    |     |     |     |     |     |     |     |
| 4 | Hand grip strength                                                                                         | X         |    |    |    |    |    | X  |    |    |    |     |     |     |     |     |     |     |
| 5 | Immunological tests (4 <sup>th</sup> generation IGRA, lymphocyte subsets)                                  | X         |    |    |    |    |    | X  |    |    |    |     |     |     |     |     |     |     |
|   | <b>In household contacts</b>                                                                               |           |    |    |    |    |    |    |    |    |    |     |     |     |     |     |     |     |
| 1 | Informed consent                                                                                           | X         |    |    |    |    |    |    |    |    |    |     |     |     |     |     |     |     |
| 2 | Baseline demography, socio-economic status, co-morbid conditions, household characteristics, Access to PDS | X         |    |    |    |    |    |    |    |    |    |     |     |     |     |     |     |     |

|    |                                                                             |                                  |                                  |   |   |   |   |   |   |   |   |   |   |   |   |   |   |   |  |
|----|-----------------------------------------------------------------------------|----------------------------------|----------------------------------|---|---|---|---|---|---|---|---|---|---|---|---|---|---|---|--|
| 3. | Symptom screen                                                              | X                                | X                                | X | X | X | X | X |   |   | X |   |   | X | X | X | X | X |  |
| 4. | Clinical Evaluation if symptomatic                                          | X                                | In case of symptoms of active TB |   |   |   |   |   |   |   |   |   |   |   |   |   |   |   |  |
| 5  | Anthropometry (Height, Weight, Upper mid arm circumference)                 | X                                | X                                | X | X | X | X | X |   |   | X |   |   | X | X | X | X | X |  |
| 6  | Compliance to Nutritional supplement (Intervention arm); (12 mo. in MDR-TB) | X                                | X                                | X | X | X | X | X |   |   |   |   |   |   |   |   |   |   |  |
| 7. | #Review of non-TB infectious illnesses                                      | X                                | X                                | X | X | X | X | X | X | X | X | X | X | X | X | X | X | X |  |
| 8  | Sputum smear, CBNAAT                                                        | In case of symptoms of active TB |                                  |   |   |   |   |   |   |   |   |   |   |   |   |   |   |   |  |
| 9  | @CXR                                                                        | X                                | In case of symptoms of active TB |   |   |   |   |   |   |   |   |   |   |   |   |   |   |   |  |
|    | <b>In subsample of household contacts</b>                                   |                                  |                                  |   |   |   |   |   |   |   |   |   |   |   |   |   |   |   |  |
| 1. | Dietary recall of calories, protein intake                                  | X                                |                                  |   |   |   |   | X |   |   |   |   |   |   |   |   |   |   |  |
| 2  | Body composition (By BIA)                                                   | X                                |                                  |   |   |   |   | X |   |   |   |   |   |   |   |   |   |   |  |
| 3  | Micronutrient estimation (Vit. A, D)                                        | X                                |                                  |   |   |   |   |   |   |   |   |   |   |   |   |   |   |   |  |
| 4  | Immunological tests (4 <sup>th</sup> generation IGRA, lymphocyte subsets)   | X                                |                                  |   |   |   |   | X |   |   |   |   |   |   |   |   |   |   |  |

\* Through public health system; #respiratory infections, diarrhea, hospitalization with fever of any cause, death due to fever < 15 days duration; @ for under-five children, symptomatic contacts.

MUAC=Mid upper arm circumference; SpO2=Oxygen saturation; RBS=Random Blood Sugar; HIV=Human immunodeficiency virus; Hb=Hemoglobin; MDR-TB=Multidrug resistant tuberculosis; ECOG=Eastern Co-operative Oncology Group; CXR=Chest X-ray; CB NAAT=Cartridge based nucleic acid amplification test; BIA=Bio Impedance Analysis; PDS=public distribution system

**Table 5: Eastern Co-operative Oncology Group (ECOG) scale for functional assessment<sup>24</sup>**

| <b>ECOG categories</b>                                                                                       | <b>Additional description</b>                                                      | <b>Score</b> |
|--------------------------------------------------------------------------------------------------------------|------------------------------------------------------------------------------------|--------------|
| Able to carry out normal activity without restriction                                                        | No physical restriction                                                            | 0            |
| Unable to do physically strenuous activity, but ambulatory and able to carry out light work                  | Able to walk around the neighbourhood, but unable to do any income-generating work | 1            |
| Ambulatory and capable of all self-care, but unable to carry out any work; up and about <50% of waking hours | Able to walk around the house and backyard                                         | 2            |
| Capable of only limited self-care; confined to bed or chair >50% of waking hours                             | Able to go to the bathroom,                                                        | 3            |
| Completely disabled; cannot carry out any self-care; totally confined to bed or chair                        | Unable to go to the bathroom                                                       | 4            |

**Table 6: Case definitions for outcomes used in RATIONS trial <sup>6</sup>**

| Outcome                                                        | Case definition                                                                                                                                                                                                                                                                                                                              |
|----------------------------------------------------------------|----------------------------------------------------------------------------------------------------------------------------------------------------------------------------------------------------------------------------------------------------------------------------------------------------------------------------------------------|
| Active tuberculosis                                            | Any patient with microbiologically confirmed tuberculosis or clinically diagnosed TB                                                                                                                                                                                                                                                         |
| Microbiologically confirmed tuberculosis in adults or children | A patient who has a positive sputum smear for mycobacterium tuberculosis and/or <ul style="list-style-type: none"> <li>- Sputum/gastric aspirate is positive on CB-NAAT</li> <li>- And/or positive on culture</li> </ul>                                                                                                                     |
| Clinically diagnosed pulmonary TB                              | A patient who has symptoms suggestive of TB, is smear negative and/or negative on CB-NAAT, and/or who has chest X-ray is suggestive of TB, and where there is no alternative clinical diagnosis                                                                                                                                              |
| Clinically diagnosed extrapulmonary TB                         | A patient who is either negative on microbiological testing and/or CB-NAAT, or where an appropriate specimen is not available, and the findings (clinical/ biochemical/ cytological/ histopathological/radiological or direct visualization procedures) are suggestive of tuberculosis, and where alternative diagnosis have been ruled out. |
| Clinically diagnosed pulmonary TB in children                  | A patient who has symptoms suggestive of active pulmonary TB (Fever, cough, weight loss or absence of weight gain), and/or a chest X-ray is suggestive of TB, and there is absence of alternative diagnosis, who is negative on CB-NAAT on gastric aspirate or induced sputum, or when bacteriological confirmation has not been possible.   |

CB-NAAT=Cartridge based nucleic acid amplification test

1  
2  
3  
4  
5  
6  
7  
8  
9  
10  
11  
12  
13  
14  
15  
16  
17  
18  
19  
20  
21  
22  
23  
24  
25  
26  
27  
28  
29  
30  
31  
32  
33  
34  
35  
36  
37  
38  
39  
40  
41  
42  
43  
44  
45  
46  
47  
48  
49  
50  
51  
52  
53  
54  
55  
56  
57  
58  
59  
60

For peer review only

1  
2  
3  
4  
5  
6  
7  
8  
9  
10  
11  
12  
13  
14  
15  
16  
17  
18  
19  
20  
21  
22  
23  
24  
25  
26  
27  
28  
29  
30  
31  
32  
33  
34  
35  
36  
37  
38  
39  
40  
41  
42  
43  
44  
45  
46  
47  
48  
49  
50  
51  
52  
53  
54  
55  
56  
57  
58  
59  
60

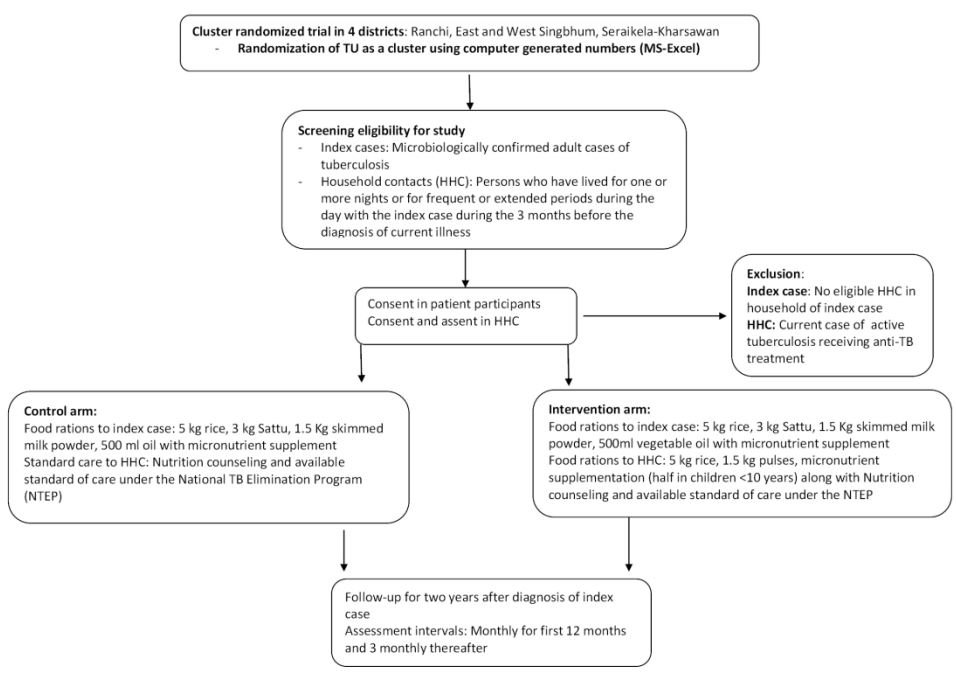

Study flow for the RATIONS Trial  
279x215mm (200 x 200 DPI)

**List of Tuberculosis treatment Units (TUs):**

1. DTC Seraikela
2. Rajnagar
3. Chandil
4. Adityapur
5. Gamharia
6. Kharsawan
7. Icchagarh
8. Angara-Ratu
9. Bundu
10. Doranda
11. Itki
12. Mandar-Burmu
13. Ormanjhi
14. Sadar (Ranchi)
15. Jagannathpur
16. Chaibasa (Urban)
17. Chakradharpur
18. Jhinkpani
19. Chaibasa (Rural)
20. Manjhari
21. Tantnagar
22. Dalbhumgarh
23. Sadar (Jamshedpur)
24. Mushabani
25. Mango
26. Baharaghoda
27. Jugsalai
28. Potka



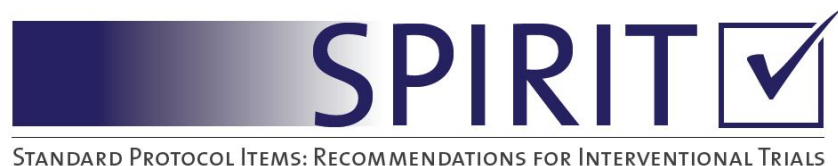

SPIRIT 2013 Checklist: Recommended items to address in a clinical trial protocol and related documents\*

| Section/item                      | ItemN | Description                                                                                                  | Addressed on page number                                                                       |
|-----------------------------------|-------|--------------------------------------------------------------------------------------------------------------|------------------------------------------------------------------------------------------------|
| <b>Administrative information</b> |       |                                                                                                              |                                                                                                |
| Title                             | 1     | Descriptive title identifying the study design, population, interventions, and, if applicable, trial acronym | Page 1                                                                                         |
| Trial registration                | 2a    | Trial identifier and registry name. If not yet registered, name of intended registry                         | Page 2 and 16<br>CTRI/2019/08/020<br>490), Clinical Trials<br>Registry of India.               |
|                                   | 2b    | All items from the World Health Organization Trial Registration Data Set                                     | Not applicable                                                                                 |
| Protocol version                  | 3     | Date and version identifier                                                                                  | Page 1                                                                                         |
| Funding                           | 4     | Sources and types of financial, material, and other support                                                  | Page no.6, 7                                                                                   |
| Roles and responsibilities        | 5a    | Names, affiliations, and roles of protocol contributors                                                      | Affiliation in<br>submission<br>website<br>placeholders and<br>protocol<br>contribution: Pg 16 |
|                                   | 5b    | Name and contact information for the trial sponsor                                                           | Page 2, 16                                                                                     |

|    |                                                           |                                                                                                                 |                                                                                                               |
|----|-----------------------------------------------------------|-----------------------------------------------------------------------------------------------------------------|---------------------------------------------------------------------------------------------------------------|
| 1  | 5c                                                        | Role of study sponsor and funders, if any, in study design; collection, management, analysis, and               | Page 16                                                                                                       |
| 2  |                                                           | interpretation of data; writing of the report; and the decision to submit the report for publication, including |                                                                                                               |
| 3  |                                                           | whether they will have ultimate authority over any of these activities                                          |                                                                                                               |
| 4  |                                                           |                                                                                                                 |                                                                                                               |
| 5  | 5d                                                        | Composition, roles, and responsibilities of the coordinating centre, steering committee, endpoint               | Appendix- 1                                                                                                   |
| 6  |                                                           | adjudication committee, data management team, and other individuals or groups overseeing the trial, if          |                                                                                                               |
| 7  |                                                           | applicable (see Item 21a for data monitoring committee)                                                         |                                                                                                               |
| 8  |                                                           |                                                                                                                 |                                                                                                               |
| 9  |                                                           |                                                                                                                 |                                                                                                               |
| 10 |                                                           |                                                                                                                 |                                                                                                               |
| 11 |                                                           |                                                                                                                 |                                                                                                               |
| 12 |                                                           |                                                                                                                 |                                                                                                               |
| 13 |                                                           |                                                                                                                 |                                                                                                               |
| 14 | <b>Introduction</b>                                       |                                                                                                                 |                                                                                                               |
| 15 |                                                           |                                                                                                                 |                                                                                                               |
| 16 | Background and                                            | 6a                                                                                                              | Description of research question and justification for undertaking the trial, including summary of relevant   |
| 17 | rationale                                                 |                                                                                                                 | studies (published and unpublished) examining benefits and harms for each intervention                        |
| 18 |                                                           |                                                                                                                 |                                                                                                               |
| 19 |                                                           | 6b                                                                                                              | Explanation for choice of comparators                                                                         |
| 20 |                                                           |                                                                                                                 | Page 4-6                                                                                                      |
| 21 | Objectives                                                | 7                                                                                                               | Specific objectives or hypotheses                                                                             |
| 22 |                                                           |                                                                                                                 | Pages 5-6, Table 1                                                                                            |
| 23 | Trial design                                              | 8                                                                                                               | Description of trial design including type of trial (eg, parallel group, crossover, factorial, single group), |
| 24 |                                                           |                                                                                                                 | allocation ratio, and framework (eg, superiority, equivalence, noninferiority, exploratory)                   |
| 25 |                                                           |                                                                                                                 | Pages 6-7                                                                                                     |
| 26 |                                                           |                                                                                                                 |                                                                                                               |
| 27 | <b>Methods: Participants, interventions, and outcomes</b> |                                                                                                                 |                                                                                                               |
| 28 |                                                           |                                                                                                                 |                                                                                                               |
| 29 | Study setting                                             | 9                                                                                                               | Description of study settings (eg, community clinic, academic hospital) and list of countries where data will |
| 30 |                                                           |                                                                                                                 | be collected. Reference to where list of study sites can be obtained                                          |
| 31 |                                                           |                                                                                                                 | Page 7,                                                                                                       |
| 32 | Eligibility criteria                                      | 10                                                                                                              | Inclusion and exclusion criteria for participants. If applicable, eligibility criteria for study centres and  |
| 33 |                                                           |                                                                                                                 | individuals who will perform the interventions (eg, surgeons, psychotherapists)                               |
| 34 |                                                           |                                                                                                                 | Page 7, Table 2                                                                                               |
| 35 | Interventions                                             | 11a                                                                                                             | Interventions for each group with sufficient detail to allow replication, including how and when they will be |
| 36 |                                                           |                                                                                                                 | administered                                                                                                  |
| 37 |                                                           |                                                                                                                 | Pages 7-8                                                                                                     |
| 38 |                                                           | 11b                                                                                                             | Criteria for discontinuing or modifying allocated interventions for a given trial participant (eg, drug dose  |
| 39 |                                                           |                                                                                                                 | change in response to harms, participant request, or improving/worsening disease)                             |
| 40 |                                                           |                                                                                                                 | Page 11                                                                                                       |
| 41 |                                                           |                                                                                                                 |                                                                                                               |
| 42 |                                                           |                                                                                                                 |                                                                                                               |
| 43 |                                                           |                                                                                                                 |                                                                                                               |
| 44 |                                                           |                                                                                                                 |                                                                                                               |
| 45 |                                                           |                                                                                                                 |                                                                                                               |
| 46 |                                                           |                                                                                                                 |                                                                                                               |

|    |                      |     |                                                                                                                                                                                                                                                                                                                                                                                |                                                                                         |
|----|----------------------|-----|--------------------------------------------------------------------------------------------------------------------------------------------------------------------------------------------------------------------------------------------------------------------------------------------------------------------------------------------------------------------------------|-----------------------------------------------------------------------------------------|
| 1  |                      | 11c | Strategies to improve adherence to intervention protocols, and any procedures for monitoring adherence (eg, drug tablet return, laboratory tests)                                                                                                                                                                                                                              | Pages 10                                                                                |
| 2  |                      |     |                                                                                                                                                                                                                                                                                                                                                                                |                                                                                         |
| 3  |                      |     |                                                                                                                                                                                                                                                                                                                                                                                |                                                                                         |
| 4  |                      | 11d | Relevant concomitant care and interventions that are permitted or prohibited during the trial                                                                                                                                                                                                                                                                                  | Page 8                                                                                  |
| 5  |                      |     |                                                                                                                                                                                                                                                                                                                                                                                |                                                                                         |
| 6  | Outcomes             | 12  | Primary, secondary, and other outcomes, including the specific measurement variable (eg, systolic blood pressure), analysis metric (eg, change from baseline, final value, time to event), method of aggregation (eg, median, proportion), and time point for each outcome. Explanation of the clinical relevance of chosen efficacy and harm outcomes is strongly recommended | Pages 5-6, Table 1                                                                      |
| 7  |                      |     |                                                                                                                                                                                                                                                                                                                                                                                |                                                                                         |
| 8  |                      |     |                                                                                                                                                                                                                                                                                                                                                                                |                                                                                         |
| 9  |                      |     |                                                                                                                                                                                                                                                                                                                                                                                |                                                                                         |
| 10 |                      |     |                                                                                                                                                                                                                                                                                                                                                                                |                                                                                         |
| 11 | Participant timeline | 13  | Time schedule of enrolment, interventions (including any run-ins and washouts), assessments, and visits for participants. A schematic diagram is highly recommended (see Figure)                                                                                                                                                                                               | Pages 7-10,12, Table 4                                                                  |
| 12 |                      |     |                                                                                                                                                                                                                                                                                                                                                                                |                                                                                         |
| 13 |                      |     |                                                                                                                                                                                                                                                                                                                                                                                |                                                                                         |
| 14 | Sample size          | 14  | Estimated number of participants needed to achieve study objectives and how it was determined, including clinical and statistical assumptions supporting any sample size calculations                                                                                                                                                                                          | Page 12-13                                                                              |
| 15 |                      |     |                                                                                                                                                                                                                                                                                                                                                                                |                                                                                         |
| 16 |                      |     |                                                                                                                                                                                                                                                                                                                                                                                |                                                                                         |
| 17 |                      |     |                                                                                                                                                                                                                                                                                                                                                                                |                                                                                         |
| 18 | Recruitment          | 15  | Strategies for achieving adequate participant enrolment to reach target sample size                                                                                                                                                                                                                                                                                            | We are enrolling consenting patients who have been diagnosed in the National TB program |
| 19 |                      |     |                                                                                                                                                                                                                                                                                                                                                                                |                                                                                         |
| 20 |                      |     |                                                                                                                                                                                                                                                                                                                                                                                |                                                                                         |
| 21 |                      |     |                                                                                                                                                                                                                                                                                                                                                                                |                                                                                         |
| 22 |                      |     |                                                                                                                                                                                                                                                                                                                                                                                |                                                                                         |
| 23 |                      |     |                                                                                                                                                                                                                                                                                                                                                                                |                                                                                         |
| 24 |                      |     |                                                                                                                                                                                                                                                                                                                                                                                |                                                                                         |
| 25 |                      |     |                                                                                                                                                                                                                                                                                                                                                                                |                                                                                         |
| 26 |                      |     |                                                                                                                                                                                                                                                                                                                                                                                |                                                                                         |

27 **Methods: Assignment of interventions (for controlled trials)**

28 Allocation:

|    |                                  |     |                                                                                                                                                                                                                                                                                                                                                          |                                                                  |
|----|----------------------------------|-----|----------------------------------------------------------------------------------------------------------------------------------------------------------------------------------------------------------------------------------------------------------------------------------------------------------------------------------------------------------|------------------------------------------------------------------|
| 29 |                                  |     |                                                                                                                                                                                                                                                                                                                                                          |                                                                  |
| 30 |                                  |     |                                                                                                                                                                                                                                                                                                                                                          |                                                                  |
| 31 | Sequence generation              | 16a | Method of generating the allocation sequence (eg, computer-generated random numbers), and list of any factors for stratification. To reduce predictability of a random sequence, details of any planned restriction (eg, blocking) should be provided in a separate document that is unavailable to those who enrol participants or assign interventions | Pages 8-9                                                        |
| 32 |                                  |     |                                                                                                                                                                                                                                                                                                                                                          |                                                                  |
| 33 |                                  |     |                                                                                                                                                                                                                                                                                                                                                          |                                                                  |
| 34 |                                  |     |                                                                                                                                                                                                                                                                                                                                                          |                                                                  |
| 35 |                                  |     |                                                                                                                                                                                                                                                                                                                                                          |                                                                  |
| 36 | Allocation concealment mechanism | 16b | Mechanism of implementing the allocation sequence (eg, central telephone; sequentially numbered, opaque, sealed envelopes), describing any steps to conceal the sequence until interventions are assigned                                                                                                                                                | Not applicable as this is an open label cluster randomised trial |
| 37 |                                  |     |                                                                                                                                                                                                                                                                                                                                                          |                                                                  |
| 38 |                                  |     |                                                                                                                                                                                                                                                                                                                                                          |                                                                  |
| 39 |                                  |     |                                                                                                                                                                                                                                                                                                                                                          |                                                                  |
| 40 |                                  |     |                                                                                                                                                                                                                                                                                                                                                          |                                                                  |
| 41 |                                  |     |                                                                                                                                                                                                                                                                                                                                                          |                                                                  |
| 42 |                                  |     |                                                                                                                                                                                                                                                                                                                                                          |                                                                  |

|    |                                                           |     |                                                                                                                                                                                                                                                                                                                                                                                                              |                               |
|----|-----------------------------------------------------------|-----|--------------------------------------------------------------------------------------------------------------------------------------------------------------------------------------------------------------------------------------------------------------------------------------------------------------------------------------------------------------------------------------------------------------|-------------------------------|
| 1  | Implementation                                            | 16c | Who will generate the allocation sequence, who will enrol participants, and who will assign participants to interventions                                                                                                                                                                                                                                                                                    | Pages 8-9                     |
| 2  |                                                           |     |                                                                                                                                                                                                                                                                                                                                                                                                              |                               |
| 3  |                                                           |     |                                                                                                                                                                                                                                                                                                                                                                                                              |                               |
| 4  | Blinding (masking)                                        | 17a | Who will be blinded after assignment to interventions (eg, trial participants, care providers, outcome assessors, data analysts), and how                                                                                                                                                                                                                                                                    | Pages 8-9, trial participants |
| 5  |                                                           |     |                                                                                                                                                                                                                                                                                                                                                                                                              |                               |
| 6  |                                                           |     |                                                                                                                                                                                                                                                                                                                                                                                                              |                               |
| 7  |                                                           | 17b | If blinded, circumstances under which unblinding is permissible, and procedure for revealing a participant's allocated intervention during the trial                                                                                                                                                                                                                                                         | Not applicable                |
| 8  |                                                           |     |                                                                                                                                                                                                                                                                                                                                                                                                              |                               |
| 9  |                                                           |     |                                                                                                                                                                                                                                                                                                                                                                                                              |                               |
| 10 |                                                           |     |                                                                                                                                                                                                                                                                                                                                                                                                              |                               |
| 11 | <b>Methods: Data collection, management, and analysis</b> |     |                                                                                                                                                                                                                                                                                                                                                                                                              |                               |
| 12 |                                                           |     |                                                                                                                                                                                                                                                                                                                                                                                                              |                               |
| 13 | Data collection methods                                   | 18a | Plans for assessment and collection of outcome, baseline, and other trial data, including any related processes to promote data quality (eg, duplicate measurements, training of assessors) and a description of study instruments (eg, questionnaires, laboratory tests) along with their reliability and validity, if known. Reference to where data collection forms can be found, if not in the protocol | Pages 7-9, Page 13            |
| 14 |                                                           |     |                                                                                                                                                                                                                                                                                                                                                                                                              |                               |
| 15 |                                                           |     |                                                                                                                                                                                                                                                                                                                                                                                                              |                               |
| 16 |                                                           |     |                                                                                                                                                                                                                                                                                                                                                                                                              |                               |
| 17 |                                                           |     |                                                                                                                                                                                                                                                                                                                                                                                                              |                               |
| 18 |                                                           |     |                                                                                                                                                                                                                                                                                                                                                                                                              |                               |
| 19 |                                                           | 18b | Plans to promote participant retention and complete follow-up, including list of any outcome data to be collected for participants who discontinue or deviate from intervention protocols                                                                                                                                                                                                                    | Page 10                       |
| 20 |                                                           |     |                                                                                                                                                                                                                                                                                                                                                                                                              |                               |
| 21 |                                                           |     |                                                                                                                                                                                                                                                                                                                                                                                                              |                               |
| 22 | Data management                                           | 19  | Plans for data entry, coding, security, and storage, including any related processes to promote data quality (eg, double data entry; range checks for data values). Reference to where details of data management procedures can be found, if not in the protocol                                                                                                                                            | Page 13                       |
| 23 |                                                           |     |                                                                                                                                                                                                                                                                                                                                                                                                              |                               |
| 24 |                                                           |     |                                                                                                                                                                                                                                                                                                                                                                                                              |                               |
| 25 |                                                           |     |                                                                                                                                                                                                                                                                                                                                                                                                              |                               |
| 26 | Statistical methods                                       | 20a | Statistical methods for analysing primary and secondary outcomes. Reference to where other details of the statistical analysis plan can be found, if not in the protocol                                                                                                                                                                                                                                     | Page 13-15                    |
| 27 |                                                           |     |                                                                                                                                                                                                                                                                                                                                                                                                              |                               |
| 28 |                                                           |     |                                                                                                                                                                                                                                                                                                                                                                                                              |                               |
| 29 |                                                           |     |                                                                                                                                                                                                                                                                                                                                                                                                              |                               |
| 30 |                                                           | 20b | Methods for any additional analyses (eg, subgroup and adjusted analyses)                                                                                                                                                                                                                                                                                                                                     | Page 14                       |
| 31 |                                                           |     |                                                                                                                                                                                                                                                                                                                                                                                                              |                               |
| 32 |                                                           | 20c | Definition of analysis population relating to protocol non-adherence (eg, as randomised analysis), and any statistical methods to handle missing data (eg, multiple imputation)                                                                                                                                                                                                                              | Page 13                       |
| 33 |                                                           |     |                                                                                                                                                                                                                                                                                                                                                                                                              |                               |
| 34 |                                                           |     |                                                                                                                                                                                                                                                                                                                                                                                                              |                               |
| 35 | <b>Methods: Monitoring</b>                                |     |                                                                                                                                                                                                                                                                                                                                                                                                              |                               |
| 36 |                                                           |     |                                                                                                                                                                                                                                                                                                                                                                                                              |                               |
| 37 | Data monitoring                                           | 21a | Composition of data monitoring committee (DMC); summary of its role and reporting structure; statement of whether it is independent from the sponsor and competing interests; and reference to where further details about its charter can be found, if not in the protocol. Alternatively, an explanation of why a DMC is not needed                                                                        | Page 13                       |
| 38 |                                                           |     |                                                                                                                                                                                                                                                                                                                                                                                                              |                               |
| 39 |                                                           |     |                                                                                                                                                                                                                                                                                                                                                                                                              |                               |
| 40 |                                                           |     |                                                                                                                                                                                                                                                                                                                                                                                                              |                               |
| 41 |                                                           |     |                                                                                                                                                                                                                                                                                                                                                                                                              |                               |
| 42 |                                                           |     |                                                                                                                                                                                                                                                                                                                                                                                                              |                               |
| 43 |                                                           |     |                                                                                                                                                                                                                                                                                                                                                                                                              |                               |
| 44 |                                                           |     |                                                                                                                                                                                                                                                                                                                                                                                                              |                               |
| 45 |                                                           |     |                                                                                                                                                                                                                                                                                                                                                                                                              |                               |
| 46 |                                                           |     |                                                                                                                                                                                                                                                                                                                                                                                                              |                               |

|    |                                 |     |                                                                                                                                                                                                                                  |                                                                                                                                                                                |
|----|---------------------------------|-----|----------------------------------------------------------------------------------------------------------------------------------------------------------------------------------------------------------------------------------|--------------------------------------------------------------------------------------------------------------------------------------------------------------------------------|
| 1  |                                 | 21b | Description of any interim analyses and stopping guidelines, including who will have access to these interim results and make the final decision to terminate the trial                                                          | Page 15                                                                                                                                                                        |
| 2  |                                 |     |                                                                                                                                                                                                                                  |                                                                                                                                                                                |
| 3  |                                 |     |                                                                                                                                                                                                                                  |                                                                                                                                                                                |
| 4  | Harms                           | 22  | Plans for collecting, assessing, reporting, and managing solicited and spontaneously reported adverse events and other unintended effects of trial interventions or trial conduct                                                | Page 15                                                                                                                                                                        |
| 5  |                                 |     |                                                                                                                                                                                                                                  |                                                                                                                                                                                |
| 6  |                                 |     |                                                                                                                                                                                                                                  |                                                                                                                                                                                |
| 7  | Auditing                        | 23  | Frequency and procedures for auditing trial conduct, if any, and whether the process will be independent from investigators and the sponsor                                                                                      | Page 13 mentions reporting and oversight in the trial. Decision for audit lies with the trial sponsor. This is not a drug trial so audit by regulatory agency is not involved. |
| 8  |                                 |     |                                                                                                                                                                                                                                  |                                                                                                                                                                                |
| 9  |                                 |     |                                                                                                                                                                                                                                  |                                                                                                                                                                                |
| 10 |                                 |     |                                                                                                                                                                                                                                  |                                                                                                                                                                                |
| 11 |                                 |     |                                                                                                                                                                                                                                  |                                                                                                                                                                                |
| 12 |                                 |     |                                                                                                                                                                                                                                  |                                                                                                                                                                                |
| 13 |                                 |     |                                                                                                                                                                                                                                  |                                                                                                                                                                                |
| 14 |                                 |     |                                                                                                                                                                                                                                  |                                                                                                                                                                                |
| 15 |                                 |     |                                                                                                                                                                                                                                  |                                                                                                                                                                                |
| 16 |                                 |     |                                                                                                                                                                                                                                  |                                                                                                                                                                                |
| 17 |                                 |     |                                                                                                                                                                                                                                  |                                                                                                                                                                                |
| 18 |                                 |     |                                                                                                                                                                                                                                  |                                                                                                                                                                                |
| 19 |                                 |     |                                                                                                                                                                                                                                  |                                                                                                                                                                                |
| 20 |                                 |     |                                                                                                                                                                                                                                  |                                                                                                                                                                                |
| 21 | <b>Ethics and dissemination</b> |     |                                                                                                                                                                                                                                  |                                                                                                                                                                                |
| 22 |                                 |     |                                                                                                                                                                                                                                  |                                                                                                                                                                                |
| 23 | Research ethics approval        | 24  | Plans for seeking research ethics committee/institutional review board (REC/IRB) approval                                                                                                                                        | Page 15                                                                                                                                                                        |
| 24 |                                 |     |                                                                                                                                                                                                                                  |                                                                                                                                                                                |
| 25 |                                 |     |                                                                                                                                                                                                                                  |                                                                                                                                                                                |
| 26 | Protocol amendments             | 25  | Plans for communicating important protocol modifications (eg, changes to eligibility criteria, outcomes, analyses) to relevant parties (eg, investigators, REC/IRBs, trial participants, trial registries, journals, regulators) | Page 15                                                                                                                                                                        |
| 27 |                                 |     |                                                                                                                                                                                                                                  |                                                                                                                                                                                |
| 28 |                                 |     |                                                                                                                                                                                                                                  |                                                                                                                                                                                |
| 29 |                                 |     |                                                                                                                                                                                                                                  |                                                                                                                                                                                |
| 30 | Consent or assent               | 26a | Who will obtain informed consent or assent from potential trial participants or authorised surrogates, and how (see Item 32)                                                                                                     | Page 9                                                                                                                                                                         |
| 31 |                                 |     |                                                                                                                                                                                                                                  |                                                                                                                                                                                |
| 32 |                                 |     |                                                                                                                                                                                                                                  |                                                                                                                                                                                |
| 33 |                                 |     |                                                                                                                                                                                                                                  |                                                                                                                                                                                |
| 34 |                                 | 26b | Additional consent provisions for collection and use of participant data and biological specimens in ancillary studies, if applicable                                                                                            | Page 15                                                                                                                                                                        |
| 35 |                                 |     |                                                                                                                                                                                                                                  |                                                                                                                                                                                |
| 36 |                                 |     |                                                                                                                                                                                                                                  |                                                                                                                                                                                |
| 37 | Confidentiality                 | 27  | How personal information about potential and enrolled participants will be collected, shared, and maintained in order to protect confidentiality before, during, and after the trial                                             | Page 15                                                                                                                                                                        |
| 38 |                                 |     |                                                                                                                                                                                                                                  |                                                                                                                                                                                |
| 39 |                                 |     |                                                                                                                                                                                                                                  |                                                                                                                                                                                |
| 40 | Declaration of interests        | 28  | Financial and other competing interests for principal investigators for the overall trial and each study site                                                                                                                    | Page 16                                                                                                                                                                        |
| 41 |                                 |     |                                                                                                                                                                                                                                  |                                                                                                                                                                                |
| 42 |                                 |     |                                                                                                                                                                                                                                  |                                                                                                                                                                                |

|    |                      |     |                                                                                                                 |                  |
|----|----------------------|-----|-----------------------------------------------------------------------------------------------------------------|------------------|
| 1  | Access to data       | 29  | Statement of who will have access to the final trial dataset, and disclosure of contractual agreements that     | Page 13          |
| 2  |                      |     | limit such access for investigators                                                                             |                  |
| 3  |                      |     |                                                                                                                 |                  |
| 4  | Ancillary and post-  | 30  | Provisions, if any, for ancillary and post-trial care, and for compensation to those who suffer harm from trial | Page 15          |
| 5  | trial care           |     | participation                                                                                                   |                  |
| 6  |                      |     |                                                                                                                 |                  |
| 7  | Dissemination policy | 31a | Plans for investigators and sponsor to communicate trial results to participants, healthcare professionals,     | Page 15-16       |
| 8  |                      |     | the public, and other relevant groups (eg, via publication, reporting in results databases, or other data       |                  |
| 9  |                      |     | sharing arrangements), including any publication restrictions                                                   |                  |
| 10 |                      |     |                                                                                                                 |                  |
| 11 |                      | 31b | Authorship eligibility guidelines and any intended use of professional writers                                  | We shall follow  |
| 12 |                      |     |                                                                                                                 | ICMJE guidelines |
| 13 |                      |     |                                                                                                                 |                  |
| 14 |                      | 31c | Plans, if any, for granting public access to the full protocol, participant-level dataset, and statistical code | No plans         |
| 15 |                      |     |                                                                                                                 |                  |
| 16 |                      |     |                                                                                                                 |                  |
| 17 | <b>Appendices</b>    |     |                                                                                                                 |                  |
| 18 |                      |     |                                                                                                                 |                  |
| 19 | Informed consent     | 32  | Model consent form and other related documentation given to participants and authorised surrogates              | Appendix-2 (for  |
| 20 | materials            |     |                                                                                                                 | editor only)     |
| 21 |                      |     |                                                                                                                 |                  |
| 22 | Biological           | 33  | Plans for collection, laboratory evaluation, and storage of biological specimens for genetic or molecular       | Page 15          |
| 23 | specimens            |     | analysis in the current trial and for future use in ancillary studies, if applicable                            |                  |
| 24 |                      |     |                                                                                                                 |                  |

\*It is strongly recommended that this checklist be read in conjunction with the SPIRIT 2013 Explanation & Elaboration for important clarification on the items. Amendments to the protocol should be tracked and dated. The SPIRIT checklist is copyrighted by the SPIRIT Group under the Creative Commons [“Attribution-NonCommercial-NoDerivs 3.0 Unported”](https://creativecommons.org/licenses/by-nc-nd/3.0/) license.

# BMJ Open

**The RATIONS (Reducing Activation of Tuberculosis by Improvement of Nutritional Status) study: A cluster randomized trial of nutritional support (food rations) to reduce TB-incidence in household contacts of patients with microbiologically confirmed pulmonary tuberculosis in communities with a high prevalence of undernutrition, Jharkhand, India**

|                                 |                                                                                                                                                                                                                                                                                                                                                                                                                                                                                                                                                                                                                                                                                                                                                                                                                                                                                                                                                                                     |
|---------------------------------|-------------------------------------------------------------------------------------------------------------------------------------------------------------------------------------------------------------------------------------------------------------------------------------------------------------------------------------------------------------------------------------------------------------------------------------------------------------------------------------------------------------------------------------------------------------------------------------------------------------------------------------------------------------------------------------------------------------------------------------------------------------------------------------------------------------------------------------------------------------------------------------------------------------------------------------------------------------------------------------|
| Journal:                        | <i>BMJ Open</i>                                                                                                                                                                                                                                                                                                                                                                                                                                                                                                                                                                                                                                                                                                                                                                                                                                                                                                                                                                     |
| Manuscript ID                   | bmjopen-2020-047210.R1                                                                                                                                                                                                                                                                                                                                                                                                                                                                                                                                                                                                                                                                                                                                                                                                                                                                                                                                                              |
| Article Type:                   | Protocol                                                                                                                                                                                                                                                                                                                                                                                                                                                                                                                                                                                                                                                                                                                                                                                                                                                                                                                                                                            |
| Date Submitted by the Author:   | 30-Mar-2021                                                                                                                                                                                                                                                                                                                                                                                                                                                                                                                                                                                                                                                                                                                                                                                                                                                                                                                                                                         |
| Complete List of Authors:       | Bhargava, Anurag ; Yenepoya Medical College Hospital, Medicine ; Yenepoya University, Center for Nutrition Studies<br>Bhargava, Madhavi; Yenepoya Medical College Hospital, Community Medicine; Yenepoya University, Center for Nutrition Studies<br>Velayutham , Banurekha ; National Institute of Research in Tuberculosis Thiruvengadam, Kannan; National Institute of Research in Tuberculosis Watson , Basilea; National Institute of Research in Tuberculosis Kulkarni, Bharati; National Institute of Nutrition; National Institute of Nutrition,<br>Singh, Manjula; Indian Council of Medical Research, ECD<br>Dayal, Rakesh; State TB Cell<br>Pathak , Rajeev ; World Health Organization, Technical Support Network<br>Mitra, Anindya; State Tuberculosis Demonstration and Training Centre<br>Rade, Kiran ; World Health Organisation Country Office for India<br>Sachdeva, KS; India Ministry of Health and Family Welfare, National Tuberculosis Elimination Programme |
| <b>Primary Subject Heading</b>: | Infectious diseases                                                                                                                                                                                                                                                                                                                                                                                                                                                                                                                                                                                                                                                                                                                                                                                                                                                                                                                                                                 |
| Secondary Subject Heading:      | Public health, Nutrition and metabolism, Global health                                                                                                                                                                                                                                                                                                                                                                                                                                                                                                                                                                                                                                                                                                                                                                                                                                                                                                                              |
| Keywords:                       | NUTRITION & DIETETICS, Tuberculosis < INFECTIOUS DISEASES, PREVENTIVE MEDICINE, Public health < INFECTIOUS DISEASES                                                                                                                                                                                                                                                                                                                                                                                                                                                                                                                                                                                                                                                                                                                                                                                                                                                                 |
|                                 |                                                                                                                                                                                                                                                                                                                                                                                                                                                                                                                                                                                                                                                                                                                                                                                                                                                                                                                                                                                     |

SCHOLARONE™  
Manuscripts

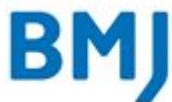

I, the Submitting Author has the right to grant and does grant on behalf of all authors of the Work (as defined in the below author licence), an exclusive licence and/or a non-exclusive licence for contributions from authors who are: i) UK Crown employees; ii) where BMJ has agreed a CC-BY licence shall apply, and/or iii) in accordance with the terms applicable for US Federal Government officers or employees acting as part of their official duties; on a worldwide, perpetual, irrevocable, royalty-free basis to BMJ Publishing Group Ltd ("BMJ") its licensees and where the relevant Journal is co-owned by BMJ to the co-owners of the Journal, to publish the Work in this journal and any other BMJ products and to exploit all rights, as set out in our [licence](#).

The Submitting Author accepts and understands that any supply made under these terms is made by BMJ to the Submitting Author unless you are acting as an employee on behalf of your employer or a postgraduate student of an affiliated institution which is paying any applicable article publishing charge ("APC") for Open Access articles. Where the Submitting Author wishes to make the Work available on an Open Access basis (and intends to pay the relevant APC), the terms of reuse of such Open Access shall be governed by a Creative Commons licence – details of these licences and which [Creative Commons](#) licence will apply to this Work are set out in our licence referred to above.

Other than as permitted in any relevant BMJ Author's Self Archiving Policies, I confirm this Work has not been accepted for publication elsewhere, is not being considered for publication elsewhere and does not duplicate material already published. I confirm all authors consent to publication of this Work and authorise the granting of this licence.



1  
2  
3 **The RATIONS (Reducing Activation of Tuberculosis by Improvement of Nutritional**  
4 **Status) study: A cluster randomized trial of nutritional support (food rations) to reduce**  
5 **TB-incidence in household contacts of patients with microbiologically confirmed**  
6 **TB-incidence in household contacts of patients with microbiologically confirmed**  
7 **pulmonary tuberculosis in communities with a high prevalence of undernutrition,**  
8 **Jharkhand, India**  
9  
10

11  
12 Anurag Bhargava,<sup>1,3,4</sup> Madhavi Bhargava<sup>2,3\*</sup>, Banurekha Velayutham<sup>5\*</sup>, Kannan  
13 Thiruvengadam<sup>6</sup>, Basilea Watson<sup>7</sup>, Bharati Kulkarni<sup>8</sup>, Manjula Singh<sup>9</sup>, Rakesh Dayal<sup>10</sup>,  
14 Rajeev Ranjan Pathak<sup>11</sup>, Anindya Mitra<sup>12</sup>, Kiran Rade<sup>13</sup>, Kuldeep Singh Sachdeva<sup>14</sup>  
15  
16

17 *\*contributed equally*  
18

19 <sup>1</sup> Department of Medicine, Yenepoya Medical College, Mangalore, India

20 <sup>2</sup> Department of Community Medicine, Yenepoya Medical College, Mangalore, India

21 <sup>3</sup> Center for Nutrition Studies, Yenepoya (Deemed to be University), Mangalore, India

22 <sup>4</sup> Department of Medicine, McGill University, Montreal, Canada

23 <sup>5</sup> Department of Clinical Research, ICMR-National Institute of Research in Tuberculosis,  
24 Chennai, India

25 <sup>6</sup> Statistics Section, Epidemiology Unit, ICMR-National Institute of Research in  
26 Tuberculosis, Chennai, India

27 <sup>7</sup> Electronic Data Processing Unit, ICMR-National Institute of Research in Tuberculosis,  
28 Chennai, India

29 <sup>8</sup> ICMR -National Institute of Nutrition, Hyderabad, India

30 <sup>9</sup> Epidemiology and Communicable Diseases Division, Indian Council of Medical Research,  
31 New Delhi, India

32 <sup>10</sup> State Tuberculosis Cell, Department of Health, Ranchi, India

33 <sup>11</sup> World Health Organization, Technical Support Network, Ranchi, India

34 <sup>12</sup> State Tuberculosis Cell, State TB Training and Demonstration Centre, Ranchi, India

35 <sup>13</sup> World Health Organization, Country Office for India, New Delhi, India

36 <sup>14</sup> National Tuberculosis Elimination Program, Central TB Division, New Delhi, India  
37  
38  
39  
40  
41  
42  
43  
44

45 **Corresponding author:** Dr Anurag Bhargava

46 **Postal Address:** Dept of Medicine, Yenepoya Medical College Campus, University Road,  
47 Deralakatte. 575018. Mangalore, Karnataka, India.  
48

49 **Email:** [anuragb17@gmail.com](mailto:anuragb17@gmail.com)  
50  
51

52 **Key Words:** food supplement, macronutrients, malnutrition, mortality, prevention  
53  
54

55 **Word Count:** 4736  
56  
57

58 **Protocol Version** 3.1, Dated September 10, 2019  
59  
60

## Abstract

**Introduction:** India has the largest burden of cases and deaths related to TB. Undernutrition is the leading risk factor accounting for TB incidence, while severe undernutrition is a common risk factor for TB mortality in patients with TB in India. The impact of nutritional supplementation on TB incidence is unknown, while few underpowered studies have assessed its impact on TB mortality. We designed an open-label, field based cluster randomised trial to assess the impact of nutritional supplementation (with food rations) on TB-incidence in a group at higher risk of TB infection and disease, viz. household contacts (HHC) of patients with microbiologically confirmed pulmonary tuberculosis (PTB) in Jharkhand, a state with a high prevalence of undernutrition.

**Methods and Analysis:** We shall enroll 2800 adult patients with PTB of the national TB program, across 28 treatment units in 4 districts; and their approximately 11,200 eligible contacts. The sample size has 80% power to detect the primary outcome of 50% reduction in incidence of active TB in HHC over 2 years of follow-up. Patients and HHC in both the arms will undergo nutritional assessment and counseling. Patients will receive monthly food rations (supplying 1200 kilocalories and 52 proteins per day ) and multivitamins along with anti-tubercular treatment. The HHC in the intervention arm will receive food rations (supplying 750 kilocalories and 23 g proteins per day) and multivitamins while HHC in control arm will be on usual diet. The secondary outcomes in HHC will include effects on nutritional status, non-TB infections. Secondary outcomes in patients are effects on TB mortality, adherence, adverse effects, nutritional and performance status. Sub-studies will examine micronutrient status and effects on dietary intake, body composition, muscle strength and immune function.

**Ethics and dissemination:** The Institutional Ethics Committee of ICMR-NIRT, Chennai approved the study (289/NIRT-IEC/2018). The results will be disseminated in publications and presentations.

**Trial registration number:** Clinical Trial Registry of India (CTRI/2019/08/020490).

### Strengths and Limitations of the study

- The RATIONS study is the first trial addressing undernutrition to reduce TB incidence in communities with high prevalence of poverty, undernutrition and low prevalence of HIV infection.
- It is the largest trial to evaluate the impact of nutritional support on TB mortality in a programme-based cohort of patients with pulmonary tuberculosis and a high prevalence of undernutrition.
- The follow-up period of two years will ensure detection of most cases of incident TB in household contacts and recurrence of TB in index cases.
- The quantum of food rations per participant is standardized, and in the absence of individual needs assessment, the extent to which the intervention meets individual needs is unknown.
- Food sharing in the families in the control arm and extra food consumption from other sources can't be ruled out

## Introduction

Tuberculosis (TB) is a global public health problem leading to significant morbidity and mortality, especially in low and middle income countries. An estimated 10 million people developed TB and 1.2 million (HIV-negative) people succumbed to it in 2019.<sup>1</sup> India was the major contributor to the global TB burden with an estimated 2.6 million new cases (27% of global) and 0.4 million (35% of global) TB-deaths in HIV-negative people in 2019.<sup>1</sup>

The United Nations Sustainable Development Goals-3 (SDG-3) has a target for ending the TB epidemic by 2030 and aims to reduce TB-incidence and TB-deaths by 80% and 90% of the 2015 levels respectively.<sup>2</sup> As per the National Strategic Plan (2017-25), the Revised National Tuberculosis Control Program (RNTCP) (renamed as National Tuberculosis Elimination Program, NTEP) in India has set an ambitious target of achieving the 2030 SDG milestone by 2025, five years ahead of the global target.<sup>3</sup>

The End TB strategy will require a mix of biomedical, public health and social interventions to achieve these goals.<sup>2</sup> The strategy requires acceleration of the current decline of 1.5% to 10-17% per year.<sup>4</sup> The present biomedical approach to TB prevention based on vaccination and TB preventive treatment (TPT) has its limitations. The efficacy of BCG vaccine is limited to prevention of severe forms of childhood TB.<sup>5</sup> The TPT with isoniazid in countries like India currently covers only select groups of contacts like under-six children and people living with HIV (PLHIV).<sup>6</sup> WHO recently made a conditional recommendation of offering TPT to all house-hold contacts (HHC).<sup>7</sup> However, there are considerable logistical and technical challenges in countries with a high burden of latent TB infection (LTBI).<sup>8</sup>

### Rationale for the trial:

The End TB strategy recognizes the need for new tools, interventions and strategies to address the problem of TB-incidence and adverse outcomes.<sup>2</sup> Globally an estimated 1.7 billion people or 23% of the population have LTBI which remains latent in 90% in presence of innate and cell mediated immunity.<sup>9</sup> Risk factors like HIV, undernutrition, uncontrolled diabetes, smoking and alcohol impair immunity, leading to active TB, and act as drivers of the TB epidemic. Undernutrition results from deficient intake or assimilation of energy and nutrients, often in association with disease-associated inflammation, and is a part of the broader spectrum of malnutrition, which includes both undernutrition, overweight and obesity

1  
2  
3 and deficiencies of micronutrients. Undernutrition in children is commonly defined by the  
4 well-accepted WHO indicators of low birth weight in newborns, underweight (low weight for  
5 age), stunting (low height for age) and wasting (low weight for height) in preschool children  
6 and by age and gender-specific cutoffs for BMI in those 6-18 years of age. In adults  
7 undernutrition is based on a low body mass index which reflects low body energy stores or  
8 chronic energy deficiency. The body mass index cut-off for underweight proposed by WHO  
9 of  $< 18.5 \text{ kg/m}^2$  for populations,<sup>10</sup> has also been accepted as a criterion for clinical diagnosis  
10 of malnutrition/undernutrition in a recent consensus statement.<sup>11</sup> In addition there have been  
11 proposals for diagnosis of undernutrition based on altered body composition, and for higher  
12 BMI cut-offs in patients undergoing significant involuntary weight loss, which require further  
13 validation.<sup>11, 12</sup>

14  
15  
16  
17  
18  
19  
20  
21  
22  
23 Undernutrition is the leading cause of impaired immunity globally,<sup>13</sup> with a consistent inverse  
24 exponential relationship between nutritional status measured by body mass index (BMI) and  
25 TB-incidence.<sup>14</sup> According to the global TB report 2020, undernutrition is a leading risk  
26 factor accounting for 2.2 million cases (19%), more than HIV and diabetes (accounting for  
27 0.76 and 0.35 million cases respectively).<sup>1</sup> Undernutrition is also a consistent risk factor for  
28 TB-mortality, regardless of HIV infection, and drug-susceptibility.<sup>15</sup> Its prevalence was as  
29 high as 23% in women and 19% in men (BMI  $< 18.5 \text{ kg/m}^2$ ) in the most recent National  
30 Family Health Survey (NFHS-4) in India.<sup>16</sup> It is higher in the poor, rural residents and those  
31 belonging to the scheduled castes and tribes, who also suffer a high burden of TB disease.<sup>16,</sup>  
32  
33  
34  
35  
36  
37  
38  
39  
40  
41  
42  
43  
44  
45  
46  
47  
48  
49  
50  
51  
52  
53  
54  
55  
56  
57  
58  
59  
60  
17 The WHO has estimated that 0.6 million cases of TB in India are attributable to  
undernutrition,<sup>1</sup> while other studies indicate that this estimate may be higher.<sup>18</sup> A majority of  
Indian patients with active TB have severe levels of undernutrition (macronutrient and  
micronutrient) which are associated with 2-4 fold higher risk of mortality.<sup>19</sup>

A single unit increase in BMI could reduce TB-incidence by 14%,<sup>14</sup> a modeling study has  
shown that TB-incidence and mortality could decline by 40-71% with nutritional  
interventions.<sup>20</sup> There is no randomized controlled trial on the effect of nutritional  
supplementation on TB-incidence. The studies on the impact of nutritional supplementation  
on TB mortality have been limited, small and underpowered.<sup>21</sup>

The RATIONS study is a cluster randomized trial to assess the impact of nutritional  
supplementation on TB-incidence among HHC of patients with microbiologically confirmed

1  
2  
3 pulmonary tuberculosis (PTB), living in a community with a high prevalence of  
4 undernutrition. They are a group at higher risk of TB infection and disease,<sup>22</sup> with a  
5 prevalence of 10-60 fold higher than in the general population.<sup>23</sup> TB-incidence was 4.8% in  
6 the HHC and 21.4% in child contacts in a previous study from Peru.<sup>24</sup> Food insecurity and  
7 undernutrition are strong and modifiable risk factors of TB in the HHC.<sup>25, 26</sup> The trial is  
8 being conducted in Jharkhand (meaning “Land of Forests”) a state in eastern India which has  
9 the a high prevalence of undernutrition in children and adults. According to the National  
10 Family Health Survey-4 (2015-6), the state has the highest levels of underweight (47.8%),  
11 wasting (29.0%), and the second highest level of stunting(45.3%) in children under six years  
12 of age in India.<sup>16, 27</sup> Similarly, more than two of out of every five (41%) of adult rural women  
13 in Jharkhand had a body mass index of less than 18.5 kg/m<sup>2</sup>, and had the highest prevalence  
14 of anemia in adult women in India(65.9%)<sup>16, 27</sup>

## 24 OBJECTIVES

25  
26  
27 The objectives and the outcome variables have been tabulated in table 1.

28  
29  
30 **Primary objective:** To evaluate the effect of household nutritional supplementation in  
31 reducing TB-incidence among HHC of patients with microbiologically confirmed PTB.

32  
33  
34 **Secondary objectives in HHC:** To evaluate the effect of nutritional supplementation on  
35 anthropometric indicators, and non-TB infectious morbidity and mortality.

36  
37  
38 **Secondary outcomes in index cases:** To evaluate the effect of nutritional supplementation  
39 on adherence to treatment, mortality, frequency of adverse effects due to treatment,  
40 performance status of patients as measured by the Eastern Cooperative Oncology Group  
41 (ECOG),<sup>28</sup> and relapse of microbiologically confirmed TB on follow-up.

42  
43  
44 **Sub-studies: Six sub-studies have been planned in a subset of index cases and HHC**

- 45  
46  
47  
48 a) Dietary intakes: To evaluate the difference in dietary intake of calories, proteins at  
49 baseline, and at the end of treatment in a subsample of the patients in both the arms.  
50  
51  
52  
53 b) Micronutrients: Vitamin A (serum retinol) and 25- hydroxyvitamin D [25(OH) D]  
54 levels in a subsample of index patient and HHC at baseline.  
55  
56  
57  
58  
59  
60

- 1  
2  
3  
4  
5  
6  
7  
8  
9  
10  
11  
12  
13  
14  
15  
16  
17  
18  
19  
20  
21  
22  
23  
24  
25  
26  
27  
28  
29  
30  
31  
32  
33  
34  
35  
36  
37  
38  
39  
40  
41  
42  
43  
44  
45  
46  
47  
48  
49  
50  
51  
52  
53  
54  
55  
56  
57  
58  
59  
60
- c) Body composition: To evaluate the difference in body composition between patients in the two arms at baseline and six months by a multifrequency bioelectric impedance analyzer (Bodystat Quadscan 4000).
  - d) Muscle function (grip strength) in a subsample of index cases at baseline, and end of treatment using a digital handheld dynamometer.
  - e) Immune function: To evaluate select aspects of immunity in index patient and their HHC before and after treatment using the lymphocyte subsets [CD4,CD8, Natural Killer (NK) cells, B lymphocytes] and kinetics of interferon  $\gamma$  responses (by CD4 and CD8 cells) in a fourth generation-Interferon Gamma Release Assay (IGRA) (QuantiFERON-TB Gold Plus: QFT-Plus)
  - f) Qualitative study in a subset of stakeholders: A qualitative study will also be conducted in a subset of the stakeholders (patients, contacts, and field staff) at the end of the intervention period to assess the perceptions and experiences of nutrition intervention.

## Methods and analysis

### Study design and oversight:

This is a cluster randomized open-label parallel-arm, superiority trial of nutritional supplementation in households with microbiologically confirmed patients with PTB in the state of Jharkhand, Eastern India. The study will randomise 28 Tuberculosis units (TUs) in four districts (Ranchi, East-Singhbhum, West-Singhbhum and Seraikela-Kharsawan) into control and intervention arms, each with 1400 adult PTB patients. It is supported by the India TB Research Consortium of the Indian Council of Medical Research (ICMR) and implemented by the Yenepoya (Deemed to be University), in association with the National Institute for Research in Tuberculosis (ICMR-NIRT), and National Institute of Nutrition (ICMR-NIN). The enrolment began on the August 16, 2019.

Study setting: Under the NTEP, each district has one District TB centre and there are sub-district administrative units called TUs. The population is predominantly rural (75%) and indigenous communities classified as “scheduled tribes” (STs) who comprise 28% of the population (national-8%) and are historically disadvantaged groups with regard to social,



1  
2  
3 economic and health indicators. According to NFHS-4, the prevalence of undernutrition in  
4 Jharkhand was 23.8% and 31.6% in adult men and women respectively, significantly higher  
5 than the national average.<sup>16</sup> A total of 44,000 TB cases were notified in the year 2017 when  
6 this trial was proposed.<sup>29</sup>  
7  
8  
9

### 10 **Eligibility criteria:**

11 The inclusion and exclusion criteria are mentioned in table 2.  
12

13  
14  
15  
16 Inclusion criteria: Adult patients ( $\geq 18$  years) with microbiologically confirmed PTB  
17 (irrespective of drug sensitivity) will constitute the index cases and will be eligible to enrol in  
18 the study. The HHC will be persons who have lived in the same house (and eating from the  
19 same kitchen), for one or more nights or for frequent or extended periods during the day with  
20 the index case during the preceding three months.  
21  
22

23  
24  
25 Exclusion criteria: An index case with no eligible HHC and any HHC currently on treatment  
26 for TB will be excluded.  
27  
28

### 29 **Study interventions:**

30  
31  
32 **Nature and quantity:** The study intervention includes macronutrients and micronutrient  
33 supplementation along with nutritional counseling as per national guidelines.<sup>30</sup> The index  
34 patients (in both arms) and the HHC (in the intervention arm) will receive a food basket and a  
35 recommended daily allowance of vitamins and micronutrients every month, as described in  
36 **Table-3**. This will be either delivered by the study staff or may be picked up from a depot as  
37 per the participant preference.  
38  
39

40  
41  
42  
43 **Frequency and duration:** The food basket will be provided for six months for new patients  
44 and 12 months for patients with MDR-TB (and their HHC in intervention arm). Extension of  
45 the intervention period to 12 months, for a patient with non-MDR-TB will be considered if  
46 there is evidence of undernutrition ( $\text{BMI} < 18.5 \text{ kg/m}^2$ ) in the index case even at the end of six  
47 months. Extension of rations to a HHC will be considered if an adult contact has a  $\text{BMI} < 16$   
48  $\text{kg/m}^2$ ; children ( $< 10$  years) have weight-for-age z-score  $< -2\text{SD}$  and adolescents (10-18 years)  
49 have BMI-for-age z-scores  $< -2\text{SD}$ .  
50  
51  
52  
53  
54

55  
56 **Nutritional counselling and assessing adherence:** The patients and the HHC will be  
57 counselled about the importance of a balanced diet for the nutritional recovery of the patient  
58  
59  
60



1  
2  
3 and the protection of the health status of the family. The families will be instructed about the  
4 optimal utilisation of the food rations in locally acceptable food recipes. The field staff will  
5 undertake follow-up visits to monitor weight gain (a proxy indicator for adherence) and  
6 check the empty packets of the milk powder as an indicator of consumption by the patient.  
7  
8  
9

### 10 11 **Co-interventions permitted during the trial**

12  
13 The patients as well as the HHC will continue to access public distribution system,  
14 supplementary feeding programs (Integrated Child Development Services Scheme, mid-day  
15 meals) as usual and additional INR 500/month as Direct Benefit Transfer availed by patients  
16 with TB in India. The eligible under-six children and those with HIV infection who have  
17 been advised by the NTEP staff to take chemoprophylaxis with isoniazid after an evaluation  
18 will continue to do so.  
19  
20  
21  
22  
23

### 24 25 **Risk assessment and referral**

26  
27 The patients will be evaluated for nutritional status, oxygen saturation, blood pressure and  
28 presence of complications at baseline and at follow-up. Patients with severe undernutrition  
29 with edema, extremely severe undernutrition ( $BMI < 14 \text{ kg/m}^2$ ), breathlessness or low oxygen  
30 saturation ( $SpO_2 < 94$ ) will be referred for inpatient care as per national guidelines.<sup>30</sup>  
31  
32  
33  
34

### 35 36 **Randomization and intervention allocation:**

37  
38 This is an open label trial, the participants and field staff, are not blinded after assignment.  
39 All the TUs from the selected districts were line-listed (list of TUs is available in  
40 supplementary file 1) and randomized equally to both the arms by computer generated  
41 random numbers using restricted randomization by the statistician at ICMR-NIRT, Chennai.  
42 The cluster allocation was kept confidential until the end of training of the field staff and the  
43 TUs were ready for implementation.  
44  
45  
46  
47  
48

### 49 50 **Enrolment of index cases and HHC**

51  
52 **Figure-1** describes the study flow. Consecutive patients diagnosed with microbiologically  
53 confirmed PTB in selected TUs will be enrolled after due consent process, during a 6-12  
54 month period. Information about the study will be given to the HHC during a home visit by  
55 the trial staff and enrolled after elicitation of voluntary written informed consent. The need  
56 for adherence to treatment and food rations, cooperation with study procedures, the stability  
57  
58  
59  
60

1  
2  
3 of residence and the willingness to permit home visits will be discussed with the index cases  
4 and HHC during enrolment.  
5  
6

#### 7 **Baseline evaluation of index cases and HHC:**

8  
9  
10 The study procedures at baseline and follow-up are denoted in **Table-4**. Demographic  
11 characteristics including gender, occupation, caste, marital status, education, socio-economic  
12 assessment with an asset score, education will be noted. Presence of self-reported risk factors  
13 such as diabetes, alcohol consumption and tobacco use, family/past history of TB will also be  
14 recorded.  
15  
16  
17

18  
19 **Clinical examination of index cases:** Weight will be measured with a digital weighing scale  
20 (SECA 803) with accuracy of 100 gm, and height using a portable stadiometer (SECA 213)  
21 with accuracy of 0.1 cm using standard procedures. Mean of two measurements of weight  
22 will be taken for calculation of BMI. Undernutrition is defined as a Body mass index < 18.5  
23 kg/m<sup>2</sup> according to the underweight definition approved by the WHO.<sup>10</sup> Patients will further  
24 be categorized into mild underweight in case the BMI is 17.0-18.49 kg/m<sup>2</sup>, moderate  
25 underweight if the BMI is 16.0-16.99 kg/m<sup>2</sup>, severely underweight if the BMI is less than 16  
26 kg/m<sup>2</sup> as suggested by WHO.<sup>31</sup> An additional category of extremely severe underweight is  
27 used to classify those with a BMI of less than or equal to 14 kg/m<sup>2</sup>.<sup>32</sup> Mid-upper arm  
28 circumference (MUAC) will be measured to the nearest of 0.1 cm on the non-dominant arm,  
29 if the patient is unable to stand. Presence of edema, blood pressure using a digital instrument  
30 (OMRON) and oxygen saturation using pulse oximeter will be noted. Assessment of  
31 performance status will be done using ECOG scale as described in **Table-5**.<sup>28</sup>  
32  
33  
34  
35  
36  
37  
38  
39  
40  
41  
42

43 **Clinical examination in contacts:** This will consist of anthropometric measurements like  
44 weight, height, MUAC (if unable to stand and in under-five), presence of edema and BCG  
45 scar.  
46  
47

48 **Laboratory evaluation of index cases:** The results of the sputum smear microscopy,  
49 cartridge based nucleic acid amplification test (CB-NAAT) - Gene Xpert MTB/RIF test,  
50 blood glucose and HIV tests (if available) will be retrieved from the NTEP records.  
51 Hemoglobin will be measured during the home visit using HemoCue Hb 201<sup>+</sup> using standard  
52 procedures and precautions. Chest X-ray (CXR) of patients at baseline will be done wherever  
53 feasible.  
54  
55  
56  
57  
58  
59  
60

1  
2  
3 **Laboratory evaluation of HHC:** Symptom screening for TB will be done in all HHC and  
4 CXR will be done wherever feasible as per the NTEP guidelines.<sup>6</sup> In case of symptoms of  
5 presumptive TB or an abnormal CXR, the HHC will be referred for sputum examination.  
6 Children with symptoms/abnormal CXR will be referred for further evaluation by sputum  
7 smear and CB-NAAT (if cough is productive) and induced sputum/gastric aspirate, if unable  
8 to produce sputum at a referral hospital.  
9

#### 14 **Follow-up of index cases and HHC:**

16  
17 The enrolled index cases and their HHC will be followed-up for two years after the diagnosis  
18 of the index case. Jharkhand is a state with potential seasonal labor migration from rural  
19 areas. All attempts (including telephonic contact) will be made to retain follow-up in case of  
20 temporary migration with an in-person visit on their return. Participants will be termed as lost  
21 to follow-up if in-person or telephonic contact is not made for  $\geq 2$  months in the intervention  
22 period; or for  $\geq 6$  months in the follow-up period. All participants lost to follow-up will be  
23 approached for an end of study evaluation to ascertain information on the primary and  
24 relevant secondary outcomes.  
25  
26

27  
28 The schedule of follow-up and assessments is described in **Table-4**. Evaluation will be done  
29 for current symptoms, any adverse effect related to treatment, adherence to treatment and  
30 rations. All HHC will be evaluated for symptoms of active TB on each visit, consumption of  
31 rations (in intervention arm), and review of non-TB infectious morbidity and mortality based  
32 on symptoms, hospitalization, or death.  
33  
34

35  
36 Patients will undergo repeat sputum examination on follow-up as per NTEP guidelines.  
37 Contacts that develop any symptoms of active TB (PTB or EPTB) will undergo appropriate  
38 investigations.  
39  
40

41  
42 The cases of active TB in HHC will be classified as co-prevalent or incident according to the  
43 time of diagnosis of the index case. A co-prevalent case is a HHC diagnosed with active TB  
44 (microbiologically confirmed active TB or as clinically diagnosed tuberculosis) at the  
45 baseline, or within two month of the baseline screening and evaluation of the HHC. An  
46 incident case is a new case of TB in a HHC (microbiologically confirmed active TB or as  
47 clinically diagnosed) that was diagnosed more than two months following the initial negative  
48  
49  
50  
51  
52  
53  
54  
55  
56  
57  
58  
59  
60

1  
2  
3 screening and evaluation. The definition of microbiologically confirmed case and clinically  
4 diagnosed cases is as per **Table-6**.

### 7 **Qualitative study about the nutritional intervention**

9  
10 We will use a phenomenological approach to generate qualitative data through the in-depth  
11 interview of TB patients and their HHC. The participants will be purposively selected till  
12 conceptual saturation and triangulation is reached, and will be interviewed using topic guides  
13 prepared in line with the study objectives. Interviews will be tape-recorded, transcribed  
14 verbatim, and translated to English. Open Code software will be used to facilitate analysis.  
15 This sub-study will be conducted at the end of the intervention period.

### 21 **Discontinuation of study intervention and withdrawal of study participants**

22  
23 Study participants will be asked about consumption of rations and micronutrients at every  
24 visit. Rarely, they may choose to discontinue consumption of the study intervention during  
25 the intervention period, due to an unrelated illness or perceived adverse effects. The reasons  
26 for their discontinuation of study intervention will be recorded but these participants will  
27 remain in the study and undergo protocol-specified follow up procedures. However if the  
28 participants also explicitly withdraws consent for follow up and collection of additional  
29 information in addition to discontinuation of consumption of study intervention, the  
30 withdrawal of consent will be recorded, and only the data collected prior to withdrawal of  
31 consent will be used in the study. Study participants will be free to withdraw at any time  
32 during the trial. The reasons for the withdrawal will be documented which may include  
33 refusal of follow up, lost to follow up, participant request, death, or if the study sponsors  
34 decide to stop or cancel the study. Unless the participants withdraw consent for further follow  
35 up, attempts will be made to ascertain outcomes as mentioned earlier.

### 47 **Study outcomes**

48  
49 The primary outcome in HHC is the difference in number of incident cases of active TB (all  
50 forms) in the two arms by active case finding over a follow-up period of two years. The  
51 secondary outcomes are improvement in the nutritional indicators over six months, frequency  
52 of malaria, diarrhea, lower respiratory tract infection, hospitalization with fever of any cause,  
53 or death with fever of any cause less than 15 days in duration in both the trial arms.

1  
2  
3 The secondary outcomes in the index cases are successful treatment completion, TB related  
4 deaths, improvement in performance status, adverse effects, and recurrence of TB during two  
5 years follow-up. The ascertainment of primary outcomes of incident TB in contacts is by  
6 NTEP program staff (not part of the trial team).  
7  
8  
9

### 10 **Participant timeline:**

11  
12  
13 The trial has a preparatory phase of three months for site selection, staff recruitment and  
14 training, and preparation of manual of procedures. The intervention phase will be six months  
15 for drug-susceptible cases and 12 months in the MDR-TB. The follow-up phase will continue  
16 for two years from the initiation of treatment.  
17  
18  
19

### 20 **Sample size estimation**

21  
22  
23 The estimated incidence rate of PTB in the general population in India is 217/100,000  
24 population (0.208 %).<sup>4</sup> The incidence rate-ratio of TB in HHC is 15.9 (IQR, 2.6-21.4)  
25 compared to the general population, translating into 4% incidence in the HHC.<sup>22</sup> Assuming a  
26 higher burden of TB and undernutrition in India, and recent emerging evidence of  
27 significantly higher risk of TB disease following infection in close contacts,<sup>33</sup> we considered  
28 TB-incidence in HHC to be 5% over the study period. We assume 50% reduction in TB-  
29 incidence at household level with intervention.<sup>34</sup>  
30  
31  
32  
33  
34  
35

36  
37 Our sample size considers design effect at three levels; the TU level, the families of index  
38 cases and finally their HHC.<sup>35</sup> We assumed approximately 100 index cases (80-120) and their  
39 families in a cluster per annum, a correlation coefficient of 0.2 for the outcome in HHC and  
40 0.01 between members of the same cluster,<sup>22</sup> and thus a design effect of 6.75. Thus a sample  
41 size of 28 clusters with 2800 patients and approximately 11,200 contacts equally distributed  
42 in both the arms would have 80% power to detect 50% reduction of TB-incidence in  
43 intervention arm with a type-1 error of 5%.  
44  
45  
46  
47  
48

49  
50 The sub-study sample sizes were estimated based on the assumptions related to the objective  
51 of the sub-study. The sample size of 250 cases (125/arm) and 250 contacts (125/arm) was  
52 based on the prevalence of multiple vitamin deficiencies in patients with PTB,<sup>36</sup> and the  
53 prevalence of Vitamin D deficiency in apparently healthy individuals in India.<sup>37</sup>  
54  
55  
56  
57  
58  
59  
60

1  
2  
3 A sample size of 352 contacts (176/arm) was assumed to be needed to detect a 10%  
4 difference in mean CD4 counts in the contacts of the two arms after six months of  
5 intervention, with 90% power. This proportion is about 3% of the HHC and we will enroll a  
6 similar 3% of the index cases (50/arm) to assess determine the immune function at baseline  
7 and after intervention in them.  
8  
9  
10

11  
12 The sample size for the dietary intake sub-study assumes a standard deviation of 525  
13 KCalories, over a wide range of caloric intakes.<sup>38</sup> Assuming a mean difference in caloric  
14 intake between both the arms as 400 KCalories and 20% loss to follow-up, we will enroll 45  
15 contacts and 45 patients in each arm.  
16  
17  
18

### 19 20 **Data collection, management**

21  
22 The data will be collected by field investigators working in close collaboration with the  
23 NTEP staff. Study data will be collected and managed using REDCap, an electronic data  
24 capture tools<sup>39</sup> hosted at ICMR-NIRT. The data capture will be done real time using a  
25 handheld device, will be subjected to range and logic checks and will be monitored by the  
26 project technical team. A periodic quality check will be performed for accuracy and  
27 completeness by the data management team at ICMR-NIRT, which will minimize missing  
28 data. Appropriate imputation methods will be used for missing values in the analysis if  
29 required. The final dataset will be accessible to the investigators based in Yenepoya (deemed  
30 to be University) and ICMR-NIRT and will be deposited in electronic format with the trial  
31 sponsor, ICMR, at the end of the study.  
32  
33  
34  
35  
36  
37  
38  
39  
40

41 All essential trial documents, consent forms will be stored under lock and key at the  
42 recruitment site under the supervision of investigators. Electronic data will be password  
43 protected and the records will be retained for a period of five years after completion of the  
44 study.  
45  
46  
47

48 We will constitute a data safety management board (DSMB) comprising of subject experts in  
49 clinical trials, TB and nutrition along with independent biostatistician and ethicist.  
50  
51

52 Apart from the regular monitoring by the project team, there is periodic reporting to the  
53 ICMR, to the IEC of ICMR-NIRT, the trial advisory committee and the DSMB.  
54  
55

### 56 57 **Data analysis:**

1  
2  
3 The primary outcome is TB incidence among contacts, expressed as events per 100,000  
4 person-months of follow-up. Follow-up is defined as time from date of randomization until  
5 the earliest endpoint, i.e. documented TB disease or censoring (death, loss to follow-up or  
6 end of the study).  
7  
8  
9

10  
11 Cox proportional hazards model, accounting for varying follow-up times and clustering  
12 effect, will be used to compare the rate of progression of TB infection to disease among  
13 contacts between the arms and to assess its association with risk factors. Unadjusted and  
14 adjusted hazard ratios along with their 95% confidence intervals will be reported. The crude  
15 effect of the intervention will be calculated using Kaplan-Meier survival plots and compared  
16 using the log rank test.  
17  
18  
19  
20  
21

22 The primary analysis will be intention to treat. Per-protocol analysis will also be done. The  
23 models will be adjusted for relevant risk factors (age, smoking, diabetes, duration of  
24 exposure) during the sensitivity analysis.  
25  
26  
27

28 The secondary outcomes of change in weight and z-scores in patients and HHC, and the  
29 performance status in patients, will be compared using unpaired and paired t-tests and  
30 Bonferroni correction for multiple comparisons. Linear mixed regression models adjusted for  
31 age, gender, TU, caste, asset score, family size, and baseline weight will be done.  
32  
33  
34  
35

36 The secondary outcomes of frequency of non-TB morbidities and deaths due to infections in  
37 the HHC, and the frequency of deaths, adverse effects, defaults, relapse in the index cases in  
38 the two arms will be compared using the chi-square test and Cox proportional hazards  
39 regression for time to first event.  
40  
41  
42  
43

44 The patients enrolled in the sub-studies will be compared in their baseline characteristics as  
45 these have been drawn by non-random sampling of patients from the main trial. The changes  
46 in dietary intake of calories and proteins, body composition parameters and lymphocyte will  
47 be assessed among index and contacts. Interactions between treatment and change in  
48 nutritional and body composition indicators will be tested using likelihood ratio tests.  
49  
50  
51  
52

53 The effect of subgroups will be analysed based on age, gender, caste, residence, BMI, asset  
54 score, and possession of below poverty line card, alcohol use, and family history of TB. A p  
55 value <0.05 (two-tailed) will be considered statistically significant. All data will be analysed  
56 using STATA version 16.1 (StataCorp, Texas, USA).  
57  
58  
59  
60



1  
2  
3 Interim analysis will be performed on attaining 50% of outcomes in the control arm  
4 (approximately 230 cases) with a p-value<0.0054 as statistically significant. The final  
5 analysis will be done at the end of attainment of planned sample size and completion of  
6 follow-up, considering a p-value <0.0492 as statistically significant.  
7  
8  
9

## 10 **Harm**

11  
12  
13 The intervention involves locally consumed food items which are part of the daily diet and  
14 hence no specific adverse events are expected. Patients who have lactose intolerance will be  
15 offered alternatives. The possibility of 're-feeding syndrome' in severely undernourished  
16 patients will be prevented by training the field staff to offer a graded increase in food intake  
17 in such patients.  
18  
19  
20  
21  
22

23 **Ethics, participant information and consent:** Ethics clearance has been obtained from  
24 Institutional Ethics Committee of ICMR-NIRT, Chennai (NIRT-IEC no: 2018020), to which  
25 all the amendments of the protocol will be communicated. Patients and their HHC who are  
26 enrolled in the study will receive a detailed 'Participant Information Sheet' in local language  
27 before administering the informed consent. A separate consent form will be used for the adult  
28 participants enrolled in the sub-study on micronutrient status and immune function. No blood  
29 specimen will be stored for any future use. A unique numerical code will be allocated to each  
30 participant for purpose of their identification and for maintaining confidentiality. Personal  
31 identifiers will be deleted in the final research database for analysis. All forms with personal  
32 identifiers will be under lock and key with the trial team.  
33  
34  
35  
36  
37  
38  
39  
40

## 41 **Responsibility for ancillary care during the trial**

42  
43 Any index case or HHC found to have an acute illness other than TB during the follow-up  
44 visits will be facilitated by the field staff to reach the nearest government health set-up.  
45  
46  
47

## 48 **Patient and public involvement statement**

49  
50 Patients were not directly involved in the development of the research question. The  
51 components of food basket were discussed with community health workers during the  
52 preparatory phase of the trial. The training of the field staff involved interaction with TB  
53 survivors and two of the field staff in the trial are TB-survivors.  
54  
55  
56  
57

## 58 **Dissemination Plan**



1  
2  
3 The impact of nutritional support on TB incidence and outcomes in this trial will be of  
4 relevance to NTEP, India. The results will be disseminated through publications, conference  
5 presentations and briefs for the program managers, Jharkhand department of Health, policy  
6 makers and other stakeholders. We intend to share the published results in simple language  
7 with the participants and community leaders.  
8  
9  
10  
11

### 12 **Trial status**

13  
14  
15 The trial was started on 16<sup>th</sup> of August 2019 after trial registration (CTRI/2019/08/020490)  
16 and an intensive two weeks training of 56 field staff, two project consultants and one project  
17 director by State NTEP staff, nutritionist, and specialists in TB, ethicist, TB-champions,  
18 communication experts and social scientists. We have enrolled 2488 index cases and 9125  
19 HHC in the trial as of 31<sup>st</sup> of October, 2020.  
20  
21  
22  
23

### 24 **Author contributions**

25  
26  
27 AB conceived the research question. AB, MB, BV, TK, BK designed the study protocol and  
28 drafted the manuscript. BW, MS, RD, AM, RRP, KR, KSS reviewed the study protocol and  
29 provided critical intellectual content. All authors carefully read and approved the final  
30 version of the manuscript.  
31  
32

### 33 **Acknowledgements**

34  
35 We wish to gratefully acknowledge the critical inputs of Professor Dick Menzies, Director  
36 McGill International TB Centre, and Professor Andrea Benedetti, of McGill University  
37 Departments of Epidemiology, Biostatistics and Occupational Health and Medicine, on early  
38 drafts of the protocol.  
39

40  
41 We also wish to thank Dr. Soumya Swaminathan, former Director-General Indian Council of  
42 Medical Research and Chief Scientist (WHO) for her support in exploring nutritional  
43 interventions to address the TB and undernutrition syndemic in India.  
44

### 45 **Funding statement:**

46  
47 The RATONS study is supported by the India Tuberculosis Research Consortium, Indian  
48 Council of Medical Research, New Delhi, India vide grant no. 5/8/5/57/TB Consortium/Call  
49 India Project/2017/ECD-1. The funder has no role in the study design and writing of the  
50 protocol, and will not have any role in collection, management, analysis, and interpretation of  
51 data; the writing and the decision to submit any future reports for publication.  
52  
53

### 54 **Competing interests statement:**

55  
56 The authors state that they have no competing interests to declare.  
57  
58  
59  
60

1  
2  
3 **Figure 1: Study flow for the RATIONS Trial**  
4  
5  
6  
7  
8  
9  
10  
11  
12  
13  
14  
15  
16  
17  
18  
19  
20  
21  
22  
23  
24  
25  
26  
27  
28  
29  
30  
31  
32  
33  
34  
35  
36  
37  
38  
39  
40  
41  
42  
43  
44  
45  
46  
47  
48  
49  
50  
51  
52  
53  
54  
55  
56  
57  
58  
59  
60

For peer review only

**References:**

1. Global Tuberculosis Report 2020. Geneva: World Health Organization; 2020.
2. World Health Organization. Implementing the End TB strategy: The essentials. WHO/HTM/TB/2015.31. Geneva: WHO; 2015.
3. National Strategic Plan for TB Elimination (2017-2025). New Delhi Central TB Division, Ministry of Health and Family Welfare, Government of India; 2017.
4. Global Tuberculosis Report 2016. Geneva: World Health Organization; 2016.
5. Mangtani P, Abubakar I, Ariti C, Beynon R, Pimpin L, Fine PE, et al. Protection by BCG vaccine against tuberculosis: a systematic review of randomized controlled trials. Clin Infect Dis. 2014;58(4):470-80.

6. Revised National TB Control Programme :Technical and Operational Guidelines for Tuberculosis Control in India. New Delhi: Central TB Division,Ministry of Health and Family Welfare; 2016.
7. WHO consolidated guidelines on tuberculosis. Module 1: prevention – tuberculosis preventive treatment. Geneva: World Health Organization; 2020.
8. Paton NI, Borand L, Benedicto J, Kyi MM, Mahmud AM, Norazmi MN, et al. Diagnosis and management of latent tuberculosis infection in Asia: Review of current status and challenges. *Int J Infect Dis.* 2019;87:21-9.
9. Houben RM, Dodd PJ. The Global Burden of Latent Tuberculosis Infection: A Re-estimation Using Mathematical Modelling. *PLoS Med.* 2016;13(10):e1002152.
10. Physical status: The use and interpretation of anthropometry: report of a WHO expert committee. Geneva: World Health Organization,; 1995.
11. Cederholm T, Bosaeus I, Barazzoni R, Bauer J, Van Gossum A, Klek S, et al. Diagnostic criteria for malnutrition - An ESPEN Consensus Statement. *Clin Nutr.* 2015;34(3):335-40.
12. Cederholm T, Jensen GL, Correia M, Gonzalez MC, Fukushima R, Higashiguchi T, et al. GLIM criteria for the diagnosis of malnutrition - A consensus report from the global clinical nutrition community. *Clin Nutr.* 2019;38(1):1-9.
13. Bhargava A. Undernutrition, nutritionally acquired immunodeficiency, and tuberculosis control. *BMJ [Internet].* 2016; 355. Available from: <http://www.bmj.com/content/bmj/355/bmj.i5407.full.pdf>.
14. Lonroth K, Williams BG, Cegielski P, Dye C. A consistent log-linear relationship between tuberculosis incidence and body mass index. *Int J Epidemiol.* 2010;39(1):149-55.
15. Waitt CJ, Squire SB. A systematic review of risk factors for death in adults during and after tuberculosis treatment. *The International Journal of Tuberculosis and Lung Disease.* 2011;15(7):871-85.
16. International Institute for Population Sciences, ICF. National Family Health Survey (NFHS-4), 2015–16: India. IIPS Mumbai, India; 2017.
17. Mazumdar S, Satyanarayana S, Pai M. Self-reported tuberculosis in India: evidence from NFHS-4. *BMJ global health.* 2019;4(3):e001371.
18. Bhargava A, Benedetti A, Oxlade O, Menzies D, Pai M. Undernutrition and the incidence of tuberculosis in India: National and subnational estimates of the population-attributable fraction related to undernutrition. *Natl Med J India.* 2014;27(3):128-33.
19. Bhargava A, Chatterjee M, Jain Y, Chatterjee B, Kataria A, Bhargava M, et al. Nutritional status of adult patients with pulmonary tuberculosis in rural central India and its association with mortality. *PLoS One.* 2013;8(10):e77979.
20. Oxlade O, Huang CC, Murray M. Estimating the Impact of Reducing Under-Nutrition on the Tuberculosis Epidemic in the Central Eastern States of India: A Dynamic Modeling Study. *PLoS One.* 2015;10(6):e0128187.
21. Grobler L, Nagpal S, Sudarsanam TD, Sinclair D. Nutritional supplements for people being treated for active tuberculosis. *Cochrane Database Syst Rev.* 2016(6):CD006086.
22. Fox GJ, Barry SE, Britton WJ, Marks GB. Contact investigation for tuberculosis: a systematic review and meta-analysis. *Eur Respir J.* 2013;41(1):140-56.
23. Enarson DA, Fanning EA, Allen EA. Case-finding in the elimination phase of tuberculosis: high risk groups in epidemiology and clinical practice. *Bull Int Union Tuberc Lung Dis.* 1990;65(2-3):73-4.
24. Grandjean L, Gilman RH, Martin L, Soto E, Castro B, Lopez S, et al. Transmission of Multidrug-Resistant and Drug-Susceptible Tuberculosis within Households: A Prospective Cohort Study. *PLoS Med.* 2015;12(6):e1001843; discussion e.
25. Jubulis J, Kinikar A, Ithape M, Khandave M, Dixit S, Hotalkar S, et al. Modifiable risk factors associated with tuberculosis disease in children in Pune, India. *Int J Tuberc Lung Dis.* 2014;18(2):198-204.

- 1  
2  
3  
4  
5  
6  
7  
8  
9  
10  
11  
12  
13  
14  
15  
16  
17  
18  
19  
20  
21  
22  
23  
24  
25  
26  
27  
28  
29  
30  
31  
32  
33  
34  
35  
36  
37  
38  
39  
40  
41  
42  
43  
44  
45  
46  
47  
48  
49  
50  
51  
52  
53  
54  
55  
56  
57  
58  
59  
60
26. O. Morán-Mendoza, S. A. Marion, K. Elwood, D. Patrick, FitzGerald JM. Risk factors for developing tuberculosis: a 12-year follow-up of contacts of tuberculosis cases. *International Journal of Tuberculosis and Lung Disease*. 2010;14(9):1112-9.
27. Food and Nutrition Security Analysis, India, 2019. Ministry of Statistics and Programme Implementation, The World Food Programme; 2019.
28. de Valliere S, Barker RD. Poor performance status is associated with early death in patients with pulmonary tuberculosis. *Trans R Soc Trop Med Hyg*. 2006;100(7):681-6.
29. India TB Report 2018. New Delhi: Central TB Division, Ministry of Health and Family Welfare, Government of India.; 2018.
30. Guidance document on nutritional care and support for patients with tuberculosis in India. Central TB Division, Ministry of Health and Family Welfare, Government of India; 2017.
31. Consultation WE. Appropriate body-mass index for Asian populations and its implications for policy and intervention strategies. *Lancet (London, England)*. 2004;363(9403):157-63.
32. Manual of nutritional therapeutics. 5th ed: Lippincott Williams & Wilkins; 2008.
33. Trauer JM, Moyo N, Tay EL, Dale K, Ragonnet R, McBryde ES, et al. Risk of Active Tuberculosis in the Five Years Following Infection . . . 15%? *Chest*. 2016;149(2):516-25.
34. Bhargava A, Pai M, Bhargava M, Marais BJ, Menzies D. Can social interventions prevent tuberculosis?: the Papworth experiment (1918-1943) revisited. *Am J Respir Crit Care Med*. 2012;186(5):442-9.
35. Teerenstra S, Lu B, Preisser JS, van Achterberg T, Borm GF. Sample size considerations for GEE analyses of three-level cluster randomized trials. *Biometrics*. 2010;66(4):1230-7.
36. Oh J, Choi R, Park HD, Lee H, Jeong BH, Park HY, et al. Evaluation of vitamin status in patients with pulmonary tuberculosis. *J Infect*. 2017;74(3):272-80.
37. Beloyartseva M, Mithal A, Kaur P, Kalra S, Baruah MP, Mukhopadhyay S, et al. Widespread vitamin D deficiency among Indian health care professionals. *Archives of osteoporosis*. 2012;7:187-92.
38. Hall JC. A method for the rapid assessment of sample size in dietary studies. *Am J Clin Nutr*. 1983;37(3):473-7.
39. Harris PA, Taylor R, Thielke R, Payne J, Gonzalez N, Conde JG. Research electronic data capture (REDCap)--a metadata-driven methodology and workflow process for providing translational research informatics support. *Journal of biomedical informatics*. 2009;42(2):377-81.

**Table-1: Objectives of the RATIONS trial and the outcome variables**

| Objective                                                                                                                           | Outcome variables                                                                                                                                                                  | Index case | HHC |
|-------------------------------------------------------------------------------------------------------------------------------------|------------------------------------------------------------------------------------------------------------------------------------------------------------------------------------|------------|-----|
| <b>Primary Objective</b>                                                                                                            |                                                                                                                                                                                    |            |     |
| Effect of household nutritional supplementation in reducing TB incidence among HHC of patients with microbiologically confirmed PTB | Difference in number of incident cases of active TB (all forms) in the two arms detected by active case finding over a follow-up period of two years after diagnosis of index case |            | ✓   |
| <b>Secondary Objectives</b>                                                                                                         |                                                                                                                                                                                    |            |     |
| Effect of nutritional supplementation on anthropometric indicators over 6 months                                                    | Anthropometric indicators such as weight and Body Mass Index                                                                                                                       | ✓          | ✓   |
| Non-TB infectious morbidity and mortality in HHC in both the arms                                                                   | Malaria, diarrhea, lower respiratory tract infection, hospitalization with fever of any cause, or death with fever of any cause <15 days in duration                               |            | ✓   |
| Adherence to anti-TB therapy                                                                                                        | Proportion completing the therapy successfully                                                                                                                                     | ✓          |     |
| Mortality during treatment                                                                                                          | Proportion of index cases who died during treatment                                                                                                                                | ✓          |     |
| Adverse effects                                                                                                                     | Severe adverse effects with TB drugs                                                                                                                                               | ✓          |     |
| Recurrence of TB within 2 years after cure                                                                                          | Relapse rate of microbiologically confirmed TB                                                                                                                                     | ✓          |     |
| Performance status                                                                                                                  | Change in ECOG scale at 1,2 and 6 months compared to baseline                                                                                                                      | ✓          |     |
| <b>Dietary Substudy</b>                                                                                                             |                                                                                                                                                                                    |            |     |
| Evaluate the difference in dietary intake of calories and proteins                                                                  | Calorie and protein intake at baseline, and end of treatment in intervention and control arms                                                                                      | ✓          | ✓   |
| <b>Micronutrient substudy</b>                                                                                                       |                                                                                                                                                                                    |            |     |
| Assess Vitamin A and D [25(OH)D]                                                                                                    | Level of vitamin A and D at baseline                                                                                                                                               | ✓          | ✓   |

|                                                      |                                                                                                                                                                      |   |   |
|------------------------------------------------------|----------------------------------------------------------------------------------------------------------------------------------------------------------------------|---|---|
| levels                                               |                                                                                                                                                                      |   |   |
| <b>Body composition substudy</b>                     |                                                                                                                                                                      |   |   |
| Evaluation of body composition                       | Estimate fat-free mass, fat mass, and other Bioimpedance analysis parameters at baseline, and 6 months after treatment                                               | ✓ | ✓ |
| <b>Substudy on grip strength</b>                     |                                                                                                                                                                      |   |   |
| Evaluate muscle strength using hand grip dynamometer | Grip strength at baseline and 6 months                                                                                                                               | ✓ |   |
| <b>Substudy of immune function</b>                   |                                                                                                                                                                      |   |   |
| Evaluate cellular immunity in patients and HHC       | Lymphocyte subsets (CD4,CD8, Natural Killer cells, B lymphocytes), 4 <sup>th</sup> generation Interferon Gamma Release Assay (IGRA) at baseline and end of treatment | ✓ | ✓ |

HHC=household contact; PTB=pulmonary tuberculosis; MDR=multi-drug resistant tuberculosis; ECOG=eastern co-operative oncology group

**Table-2: Eligibility criteria for RATIONS trial participants**

| <b>Index cases</b>                                                         | <b>Household contacts (HHC)</b>                                                                                                                                                                     |
|----------------------------------------------------------------------------|-----------------------------------------------------------------------------------------------------------------------------------------------------------------------------------------------------|
| <b>Inclusion Criteria</b>                                                  |                                                                                                                                                                                                     |
| Patients $\geq 18$ years with microbiologically confirmed pulmonary TB     | Persons living in the same house, eating from same kitchen as index case for $\geq$ one night or for frequent or extended periods during the day during the 3 months before diagnosis in index case |
| <b>Exclusion criteria</b>                                                  |                                                                                                                                                                                                     |
| Non eligible HHC                                                           | Current smear or GeneXpert or LPA or culture confirmed TB                                                                                                                                           |
| Time interval between initiation of treatment and enrolment is $> 14$ days | Clinically diagnosed pulmonary or extra-pulmonary TB and currently on treatment                                                                                                                     |

LPA = Line probe assay

**Table-3: Nutritional supplementation in the RATIONS trial**

|                                                                | <b>Intervention arm</b>                                                                                                                                                                   | <b>Control arm</b>                                                                                                                                                                        |
|----------------------------------------------------------------|-------------------------------------------------------------------------------------------------------------------------------------------------------------------------------------------|-------------------------------------------------------------------------------------------------------------------------------------------------------------------------------------------|
| Index case*, quantity per person per month                     | Nutritional counselling<br>5 kg of rice<br>3 kg roasted Bengal gram powder (locally called as <i>sattu</i> )<br>1.5 kg of milk powder<br>500 ml vegetable oil<br>One RDA of micronutrient | Nutritional counselling<br>5 kg of rice<br>3 kg roasted Bengal gram powder (locally called as <i>sattu</i> )<br>1.5 kg of milk powder<br>500 ml vegetable oil<br>One RDA of micronutrient |
| Household contact <sup>§</sup> , quantity per person per month | Nutritional counselling<br>5 kg rice<br>1.5kg pulses (split pigeon peas)<br>One RDA of micronutrient per adult/adolescent HHC<br>Half of this amount for children less than 10 years.     | Nutritional counselling<br>Usual food assistance available to eligible households through public distribution system                                                                      |

RDA = Recommended Dietary Allowance; \* approximately 1200 kcal of energy and 52 gm proteins per day. § approximately 750 kcal of energy and 23 gm of proteins per day.

Table 4: Schedule of enrolment, assessments at baseline and follow-up in the RATIONS trial

|   | Investigations                                                                                             | Base-line | M1 | M2 | M3 | M4 | M5 | M6 | M7 | M8                                         | M9 | M10 | M11 | M12 | M15 | M18 | M21 | M24 |
|---|------------------------------------------------------------------------------------------------------------|-----------|----|----|----|----|----|----|----|--------------------------------------------|----|-----|-----|-----|-----|-----|-----|-----|
|   | <b>In index cases</b>                                                                                      |           |    |    |    |    |    |    |    |                                            |    |     |     |     |     |     |     |     |
| 1 | Informed consent                                                                                           | X         |    |    |    |    |    |    |    |                                            |    |     |     |     |     |     |     |     |
| 2 | Demography, socio-economic status, co-morbidities, household characteristics, access to PDS                | X         |    |    |    |    |    |    |    |                                            |    |     |     |     |     |     |     |     |
| 3 | Clinical Evaluation                                                                                        | X         | X  | X  | X  | X  | X  | X  | X  | X                                          | X  | X   | X   | X   | X   | X   | X   | X   |
| 4 | Anthropometry (Height, Weight, MUAC), SpO <sub>2</sub> pedal edema                                         | X         | X  | X  | X  | X  | X  | X  | X  | X                                          | X  | X   | X   | X   | X   | X   | X   | X   |
| 5 | *Laboratory evaluation RBS, HIV, Hb                                                                        | X         |    |    |    |    |    |    |    |                                            |    |     |     |     |     |     |     |     |
| 6 | Compliance to Nutritional supplement in new cases, (12 mo. in MDR-TB)                                      | X         | X  | X  | X  | X  | X  | X  | X  | X                                          | X  | X   | X   | X   |     |     |     |     |
| 7 | Performance status (modified ECOG Scale)                                                                   | X         | X  | X  |    |    |    | X  | X  | X                                          | X  | X   | X   | X   |     |     |     |     |
| 8 | *CB NAAT                                                                                                   | X         |    |    |    |    |    |    |    | (in case of symptoms of recurrent disease) |    |     |     |     |     |     |     |     |
| 9 | *CXR                                                                                                       | X         |    |    |    |    |    | X  |    |                                            |    |     |     |     |     |     |     |     |
|   | <b>In subsample of index cases</b>                                                                         |           |    |    |    |    |    |    |    |                                            |    |     |     |     |     |     |     |     |
| 1 | Dietary recall of calories, protein intake                                                                 | X         |    |    |    |    |    | X  |    |                                            |    |     |     |     |     |     |     |     |
| 2 | Body composition (By BIA)                                                                                  | X         |    |    |    |    |    | X  |    |                                            |    |     |     |     |     |     |     |     |
| 3 | Micronutrient estimation(Vit. A, D)                                                                        | X         |    |    |    |    |    |    |    |                                            |    |     |     |     |     |     |     |     |
| 4 | Hand grip strength                                                                                         | X         |    |    |    |    |    | X  |    |                                            |    |     |     |     |     |     |     |     |
| 5 | Immunological tests (4 <sup>th</sup> generation IGRA, lymphocyte subsets)                                  | X         |    |    |    |    |    | X  |    |                                            |    |     |     |     |     |     |     |     |
|   | <b>In household contacts</b>                                                                               |           |    |    |    |    |    |    |    |                                            |    |     |     |     |     |     |     |     |
| 1 | Informed consent                                                                                           | X         |    |    |    |    |    |    |    |                                            |    |     |     |     |     |     |     |     |
| 2 | Baseline demography, socio-economic status, co-morbid conditions, household characteristics, Access to PDS | X         |    |    |    |    |    |    |    |                                            |    |     |     |     |     |     |     |     |



|                                           |                                                                             |                                  |                                  |   |   |   |   |   |   |   |   |   |   |   |   |   |   |   |  |
|-------------------------------------------|-----------------------------------------------------------------------------|----------------------------------|----------------------------------|---|---|---|---|---|---|---|---|---|---|---|---|---|---|---|--|
| 3.                                        | Symptom screen                                                              | X                                | X                                | X | X | X | X | X |   |   | X |   |   | X | X | X | X | X |  |
| 4.                                        | Clinical Evaluation if symptomatic                                          | X                                | In case of symptoms of active TB |   |   |   |   |   |   |   |   |   |   |   |   |   |   |   |  |
| 5                                         | Anthropometry (Height, Weight, Upper mid arm circumference)                 | X                                | X                                | X | X | X | X | X |   |   | X |   |   | X | X | X | X | X |  |
| 6                                         | Compliance to Nutritional supplement (Intervention arm); (12 mo. in MDR-TB) | X                                | X                                | X | X | X | X | X |   |   |   |   |   |   |   |   |   |   |  |
| 7.                                        | #Review of non-TB infectious illnesses                                      | X                                | X                                | X | X | X | X | X | X | X | X | X | X | X | X | X | X | X |  |
| 8                                         | Sputum smear, CBNAAT                                                        | In case of symptoms of active TB |                                  |   |   |   |   |   |   |   |   |   |   |   |   |   |   |   |  |
| 9                                         | @CXR                                                                        | X                                | In case of symptoms of active TB |   |   |   |   |   |   |   |   |   |   |   |   |   |   |   |  |
| <b>In subsample of household contacts</b> |                                                                             |                                  |                                  |   |   |   |   |   |   |   |   |   |   |   |   |   |   |   |  |
| 1.                                        | Dietary recall of calories, protein intake                                  | X                                |                                  |   |   |   |   | X |   |   |   |   |   |   |   |   |   |   |  |
| 2                                         | Body composition (By BIA)                                                   | X                                |                                  |   |   |   |   | X |   |   |   |   |   |   |   |   |   |   |  |
| 3                                         | Micronutrient estimation (Vit. A, D)                                        | X                                |                                  |   |   |   |   |   |   |   |   |   |   |   |   |   |   |   |  |
| 4                                         | Immunological tests (4 <sup>th</sup> generation IGRA, lymphocyte subsets)   | X                                |                                  |   |   |   |   | X |   |   |   |   |   |   |   |   |   |   |  |

\* Through public health system; #respiratory infections, diarrhea, hospitalization with fever of any cause, death due to fever < 15 days duration; @ for under-five children, symptomatic contacts.

MUAC=Mid upper arm circumference; SpO2=Oxygen saturation; RBS=Random Blood Sugar; HIV=Human immunodeficiency virus; Hb=Hemoglobin; MDR-TB=Multidrug resistant tuberculosis; ECOG=Eastern Co-operative Oncology Group; CXR=Chest X-ray; CB NAAT=Cartridge based nucleic acid amplification test; BIA=Bio Impedance Analysis; PDS=public distribution system

**Table 5: Eastern Co-operative Oncology Group (ECOG) scale for functional assessment<sup>24</sup>**

| ECOG categories                                                                                              | Additional description                                                             | Score |
|--------------------------------------------------------------------------------------------------------------|------------------------------------------------------------------------------------|-------|
| Able to carry out normal activity without restriction                                                        | No physical restriction                                                            | 0     |
| Unable to do physically strenuous activity, but ambulatory and able to carry out light work                  | Able to walk around the neighbourhood, but unable to do any income-generating work | 1     |
| Ambulatory and capable of all self-care, but unable to carry out any work; up and about <50% of waking hours | Able to walk around the house and backyard                                         | 2     |
| Capable of only limited self-care; confined to bed or chair >50% of waking hours                             | Able to go to the bathroom,                                                        | 3     |
| Completely disabled; cannot carry out any self-care; totally confined to bed or chair                        | Unable to go to the bathroom                                                       | 4     |

**Table 6: Case definitions for outcomes used in RATIONS trial <sup>6</sup>**

| Outcome                                                        | Case definition                                                                                                                                                                                                                                                                                                                              |
|----------------------------------------------------------------|----------------------------------------------------------------------------------------------------------------------------------------------------------------------------------------------------------------------------------------------------------------------------------------------------------------------------------------------|
| Active tuberculosis                                            | Any patient with microbiologically confirmed tuberculosis or clinically diagnosed TB                                                                                                                                                                                                                                                         |
| Microbiologically confirmed tuberculosis in adults or children | A patient who has a positive sputum smear for mycobacterium tuberculosis and/or <ul style="list-style-type: none"> <li>- Sputum/gastric aspirate is positive on CB-NAAT</li> <li>- And/or positive on culture</li> </ul>                                                                                                                     |
| Clinically diagnosed pulmonary TB                              | A patient who has symptoms suggestive of TB, is smear negative and/or negative on CB-NAAT, and/or who has chest X-ray is suggestive of TB, and where there is no alternative clinical diagnosis                                                                                                                                              |
| Clinically diagnosed extrapulmonary TB                         | A patient who is either negative on microbiological testing and/or CB-NAAT, or where an appropriate specimen is not available, and the findings (clinical/ biochemical/ cytological/ histopathological/radiological or direct visualization procedures) are suggestive of tuberculosis, and where alternative diagnosis have been ruled out. |
| Clinically diagnosed pulmonary TB in children                  | A patient who has symptoms suggestive of active pulmonary TB (Fever, cough, weight loss or absence of weight gain), and/or a chest X-ray is suggestive of TB, and there is absence of alternative diagnosis, who is negative on CB-NAAT on gastric aspirate or induced sputum, or when bacteriological confirmation has not been possible.   |

CB-NAAT=Cartridge based nucleic acid amplification test

1  
2  
3  
4  
5  
6  
7  
8  
9  
10  
11  
12  
13  
14  
15  
16  
17  
18  
19  
20  
21  
22  
23  
24  
25  
26  
27  
28  
29  
30  
31  
32  
33  
34  
35  
36  
37  
38  
39  
40  
41  
42  
43  
44  
45  
46  
47  
48  
49  
50  
51  
52  
53  
54  
55  
56  
57  
58  
59  
60



Study flow for the RATIONS Trial  
279x215mm (200 x 200 DPI)

**List of Tuberculosis treatment Units (TUs):**

1. DTC Seraikela
2. Rajnagar
3. Chandil
4. Adityapur
5. Gamharia
6. Kharsawan
7. Icchagarh
8. Angara-Ratu
9. Bundu
10. Doranda
11. Itki
12. Mandar-Burmu
13. Ormanjhi
14. Sadar (Ranchi)
15. Jagannathpur
16. Chaibasa (Urban)
17. Chakradharpur
18. Jhinkpani
19. Chaibasa (Rural)
20. Manjhari
21. Tantnagar
22. Dalbhumgarh
23. Sadar (Jamshedpur)
24. Mushabani
25. Mango
26. Baharaghoda
27. Jugsalai
28. Potka

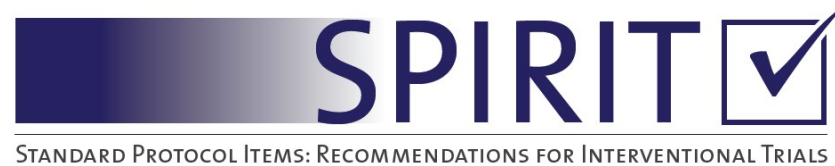

SPIRIT 2013 Checklist: Recommended items to address in a clinical trial protocol and related documents\*

| Section/item                      | ItemN | Description                                                                                                  | Addressed on page number                                                                       |
|-----------------------------------|-------|--------------------------------------------------------------------------------------------------------------|------------------------------------------------------------------------------------------------|
| <b>Administrative information</b> |       |                                                                                                              |                                                                                                |
| Title                             | 1     | Descriptive title identifying the study design, population, interventions, and, if applicable, trial acronym | Page 1                                                                                         |
| Trial registration                | 2a    | Trial identifier and registry name. If not yet registered, name of intended registry                         | Page 2 and 16<br>CTRI/2019/08/020<br>490), Clinical Trials<br>Registry of India.               |
|                                   | 2b    | All items from the World Health Organization Trial Registration Data Set                                     | Not applicable                                                                                 |
| Protocol version                  | 3     | Date and version identifier                                                                                  | Page 1                                                                                         |
| Funding                           | 4     | Sources and types of financial, material, and other support                                                  | Page no.6, 7                                                                                   |
| Roles and responsibilities        | 5a    | Names, affiliations, and roles of protocol contributors                                                      | Affiliation in<br>submission<br>website<br>placeholders and<br>protocol<br>contribution: Pg 16 |
|                                   | 5b    | Name and contact information for the trial sponsor                                                           | Page 2, 16                                                                                     |

|    |                                                           |                                                                                                                 |                                                                                                               |
|----|-----------------------------------------------------------|-----------------------------------------------------------------------------------------------------------------|---------------------------------------------------------------------------------------------------------------|
| 1  | 5c                                                        | Role of study sponsor and funders, if any, in study design; collection, management, analysis, and               | Page 16                                                                                                       |
| 2  |                                                           | interpretation of data; writing of the report; and the decision to submit the report for publication, including |                                                                                                               |
| 3  |                                                           | whether they will have ultimate authority over any of these activities                                          |                                                                                                               |
| 4  |                                                           |                                                                                                                 |                                                                                                               |
| 5  | 5d                                                        | Composition, roles, and responsibilities of the coordinating centre, steering committee, endpoint               | Appendix- 1                                                                                                   |
| 6  |                                                           | adjudication committee, data management team, and other individuals or groups overseeing the trial, if          |                                                                                                               |
| 7  |                                                           | applicable (see Item 21a for data monitoring committee)                                                         |                                                                                                               |
| 8  |                                                           |                                                                                                                 |                                                                                                               |
| 9  |                                                           |                                                                                                                 |                                                                                                               |
| 10 |                                                           |                                                                                                                 |                                                                                                               |
| 11 |                                                           |                                                                                                                 |                                                                                                               |
| 12 |                                                           |                                                                                                                 |                                                                                                               |
| 13 |                                                           |                                                                                                                 |                                                                                                               |
| 14 | <b>Introduction</b>                                       |                                                                                                                 |                                                                                                               |
| 15 |                                                           |                                                                                                                 |                                                                                                               |
| 16 | Background and                                            | 6a                                                                                                              | Description of research question and justification for undertaking the trial, including summary of relevant   |
| 17 | rationale                                                 |                                                                                                                 | studies (published and unpublished) examining benefits and harms for each intervention                        |
| 18 |                                                           |                                                                                                                 |                                                                                                               |
| 19 |                                                           | 6b                                                                                                              | Explanation for choice of comparators                                                                         |
| 20 |                                                           |                                                                                                                 | Page 4-6                                                                                                      |
| 21 | Objectives                                                | 7                                                                                                               | Specific objectives or hypotheses                                                                             |
| 22 |                                                           |                                                                                                                 | Pages 5-6, Table 1                                                                                            |
| 23 | Trial design                                              | 8                                                                                                               | Description of trial design including type of trial (eg, parallel group, crossover, factorial, single group), |
| 24 |                                                           |                                                                                                                 | allocation ratio, and framework (eg, superiority, equivalence, noninferiority, exploratory)                   |
| 25 |                                                           |                                                                                                                 | Pages 6-7                                                                                                     |
| 26 |                                                           |                                                                                                                 |                                                                                                               |
| 27 | <b>Methods: Participants, interventions, and outcomes</b> |                                                                                                                 |                                                                                                               |
| 28 |                                                           |                                                                                                                 |                                                                                                               |
| 29 | Study setting                                             | 9                                                                                                               | Description of study settings (eg, community clinic, academic hospital) and list of countries where data will |
| 30 |                                                           |                                                                                                                 | be collected. Reference to where list of study sites can be obtained                                          |
| 31 |                                                           |                                                                                                                 | Page 7,                                                                                                       |
| 32 | Eligibility criteria                                      | 10                                                                                                              | Inclusion and exclusion criteria for participants. If applicable, eligibility criteria for study centres and  |
| 33 |                                                           |                                                                                                                 | individuals who will perform the interventions (eg, surgeons, psychotherapists)                               |
| 34 |                                                           |                                                                                                                 | Page 7, Table 2                                                                                               |
| 35 | Interventions                                             | 11a                                                                                                             | Interventions for each group with sufficient detail to allow replication, including how and when they will be |
| 36 |                                                           |                                                                                                                 | administered                                                                                                  |
| 37 |                                                           |                                                                                                                 | Pages 7-8                                                                                                     |
| 38 |                                                           | 11b                                                                                                             | Criteria for discontinuing or modifying allocated interventions for a given trial participant (eg, drug dose  |
| 39 |                                                           |                                                                                                                 | change in response to harms, participant request, or improving/worsening disease)                             |
| 40 |                                                           |                                                                                                                 | Page 11                                                                                                       |
| 41 |                                                           |                                                                                                                 |                                                                                                               |
| 42 |                                                           |                                                                                                                 |                                                                                                               |
| 43 |                                                           |                                                                                                                 |                                                                                                               |
| 44 |                                                           |                                                                                                                 |                                                                                                               |
| 45 |                                                           |                                                                                                                 |                                                                                                               |
| 46 |                                                           |                                                                                                                 |                                                                                                               |

|    |                      |     |                                                                                                                                                                                                                                                                                                                                                                                |                                                                                         |
|----|----------------------|-----|--------------------------------------------------------------------------------------------------------------------------------------------------------------------------------------------------------------------------------------------------------------------------------------------------------------------------------------------------------------------------------|-----------------------------------------------------------------------------------------|
| 1  |                      | 11c | Strategies to improve adherence to intervention protocols, and any procedures for monitoring adherence (eg, drug tablet return, laboratory tests)                                                                                                                                                                                                                              | Pages 10                                                                                |
| 2  |                      |     |                                                                                                                                                                                                                                                                                                                                                                                |                                                                                         |
| 3  |                      |     |                                                                                                                                                                                                                                                                                                                                                                                |                                                                                         |
| 4  |                      | 11d | Relevant concomitant care and interventions that are permitted or prohibited during the trial                                                                                                                                                                                                                                                                                  | Page 8                                                                                  |
| 5  |                      |     |                                                                                                                                                                                                                                                                                                                                                                                |                                                                                         |
| 6  | Outcomes             | 12  | Primary, secondary, and other outcomes, including the specific measurement variable (eg, systolic blood pressure), analysis metric (eg, change from baseline, final value, time to event), method of aggregation (eg, median, proportion), and time point for each outcome. Explanation of the clinical relevance of chosen efficacy and harm outcomes is strongly recommended | Pages 5-6, Table 1                                                                      |
| 7  |                      |     |                                                                                                                                                                                                                                                                                                                                                                                |                                                                                         |
| 8  |                      |     |                                                                                                                                                                                                                                                                                                                                                                                |                                                                                         |
| 9  |                      |     |                                                                                                                                                                                                                                                                                                                                                                                |                                                                                         |
| 10 |                      |     |                                                                                                                                                                                                                                                                                                                                                                                |                                                                                         |
| 11 | Participant timeline | 13  | Time schedule of enrolment, interventions (including any run-ins and washouts), assessments, and visits for participants. A schematic diagram is highly recommended (see Figure)                                                                                                                                                                                               | Pages 7-10,12, Table 4                                                                  |
| 12 |                      |     |                                                                                                                                                                                                                                                                                                                                                                                |                                                                                         |
| 13 |                      |     |                                                                                                                                                                                                                                                                                                                                                                                |                                                                                         |
| 14 | Sample size          | 14  | Estimated number of participants needed to achieve study objectives and how it was determined, including clinical and statistical assumptions supporting any sample size calculations                                                                                                                                                                                          | Page 12-13                                                                              |
| 15 |                      |     |                                                                                                                                                                                                                                                                                                                                                                                |                                                                                         |
| 16 |                      |     |                                                                                                                                                                                                                                                                                                                                                                                |                                                                                         |
| 17 |                      |     |                                                                                                                                                                                                                                                                                                                                                                                |                                                                                         |
| 18 | Recruitment          | 15  | Strategies for achieving adequate participant enrolment to reach target sample size                                                                                                                                                                                                                                                                                            | We are enrolling consenting patients who have been diagnosed in the National TB program |
| 19 |                      |     |                                                                                                                                                                                                                                                                                                                                                                                |                                                                                         |
| 20 |                      |     |                                                                                                                                                                                                                                                                                                                                                                                |                                                                                         |
| 21 |                      |     |                                                                                                                                                                                                                                                                                                                                                                                |                                                                                         |
| 22 |                      |     |                                                                                                                                                                                                                                                                                                                                                                                |                                                                                         |
| 23 |                      |     |                                                                                                                                                                                                                                                                                                                                                                                |                                                                                         |
| 24 |                      |     |                                                                                                                                                                                                                                                                                                                                                                                |                                                                                         |
| 25 |                      |     |                                                                                                                                                                                                                                                                                                                                                                                |                                                                                         |
| 26 |                      |     |                                                                                                                                                                                                                                                                                                                                                                                |                                                                                         |

27 **Methods: Assignment of interventions (for controlled trials)**

28 Allocation:

|    |                                  |     |                                                                                                                                                                                                                                                                                                                                                          |                                                                  |
|----|----------------------------------|-----|----------------------------------------------------------------------------------------------------------------------------------------------------------------------------------------------------------------------------------------------------------------------------------------------------------------------------------------------------------|------------------------------------------------------------------|
| 29 |                                  |     |                                                                                                                                                                                                                                                                                                                                                          |                                                                  |
| 30 |                                  |     |                                                                                                                                                                                                                                                                                                                                                          |                                                                  |
| 31 | Sequence generation              | 16a | Method of generating the allocation sequence (eg, computer-generated random numbers), and list of any factors for stratification. To reduce predictability of a random sequence, details of any planned restriction (eg, blocking) should be provided in a separate document that is unavailable to those who enrol participants or assign interventions | Pages 8-9                                                        |
| 32 |                                  |     |                                                                                                                                                                                                                                                                                                                                                          |                                                                  |
| 33 |                                  |     |                                                                                                                                                                                                                                                                                                                                                          |                                                                  |
| 34 |                                  |     |                                                                                                                                                                                                                                                                                                                                                          |                                                                  |
| 35 |                                  |     |                                                                                                                                                                                                                                                                                                                                                          |                                                                  |
| 36 | Allocation concealment mechanism | 16b | Mechanism of implementing the allocation sequence (eg, central telephone; sequentially numbered, opaque, sealed envelopes), describing any steps to conceal the sequence until interventions are assigned                                                                                                                                                | Not applicable as this is an open label cluster randomised trial |
| 37 |                                  |     |                                                                                                                                                                                                                                                                                                                                                          |                                                                  |
| 38 |                                  |     |                                                                                                                                                                                                                                                                                                                                                          |                                                                  |
| 39 |                                  |     |                                                                                                                                                                                                                                                                                                                                                          |                                                                  |
| 40 |                                  |     |                                                                                                                                                                                                                                                                                                                                                          |                                                                  |
| 41 |                                  |     |                                                                                                                                                                                                                                                                                                                                                          |                                                                  |
| 42 |                                  |     |                                                                                                                                                                                                                                                                                                                                                          |                                                                  |



|    |                                                           |     |                                                                                                                                                                                                                                                                                                                                                                                                              |                               |
|----|-----------------------------------------------------------|-----|--------------------------------------------------------------------------------------------------------------------------------------------------------------------------------------------------------------------------------------------------------------------------------------------------------------------------------------------------------------------------------------------------------------|-------------------------------|
| 1  | Implementation                                            | 16c | Who will generate the allocation sequence, who will enrol participants, and who will assign participants to interventions                                                                                                                                                                                                                                                                                    | Pages 8-9                     |
| 2  |                                                           |     |                                                                                                                                                                                                                                                                                                                                                                                                              |                               |
| 3  |                                                           |     |                                                                                                                                                                                                                                                                                                                                                                                                              |                               |
| 4  | Blinding (masking)                                        | 17a | Who will be blinded after assignment to interventions (eg, trial participants, care providers, outcome assessors, data analysts), and how                                                                                                                                                                                                                                                                    | Pages 8-9, trial participants |
| 5  |                                                           |     |                                                                                                                                                                                                                                                                                                                                                                                                              |                               |
| 6  |                                                           |     |                                                                                                                                                                                                                                                                                                                                                                                                              |                               |
| 7  |                                                           | 17b | If blinded, circumstances under which unblinding is permissible, and procedure for revealing a participant's allocated intervention during the trial                                                                                                                                                                                                                                                         | Not applicable                |
| 8  |                                                           |     |                                                                                                                                                                                                                                                                                                                                                                                                              |                               |
| 9  |                                                           |     |                                                                                                                                                                                                                                                                                                                                                                                                              |                               |
| 10 |                                                           |     |                                                                                                                                                                                                                                                                                                                                                                                                              |                               |
| 11 | <b>Methods: Data collection, management, and analysis</b> |     |                                                                                                                                                                                                                                                                                                                                                                                                              |                               |
| 12 |                                                           |     |                                                                                                                                                                                                                                                                                                                                                                                                              |                               |
| 13 | Data collection methods                                   | 18a | Plans for assessment and collection of outcome, baseline, and other trial data, including any related processes to promote data quality (eg, duplicate measurements, training of assessors) and a description of study instruments (eg, questionnaires, laboratory tests) along with their reliability and validity, if known. Reference to where data collection forms can be found, if not in the protocol | Pages 7-9, Page 13            |
| 14 |                                                           |     |                                                                                                                                                                                                                                                                                                                                                                                                              |                               |
| 15 |                                                           |     |                                                                                                                                                                                                                                                                                                                                                                                                              |                               |
| 16 |                                                           |     |                                                                                                                                                                                                                                                                                                                                                                                                              |                               |
| 17 |                                                           |     |                                                                                                                                                                                                                                                                                                                                                                                                              |                               |
| 18 |                                                           |     |                                                                                                                                                                                                                                                                                                                                                                                                              |                               |
| 19 |                                                           | 18b | Plans to promote participant retention and complete follow-up, including list of any outcome data to be collected for participants who discontinue or deviate from intervention protocols                                                                                                                                                                                                                    | Page 10                       |
| 20 |                                                           |     |                                                                                                                                                                                                                                                                                                                                                                                                              |                               |
| 21 |                                                           |     |                                                                                                                                                                                                                                                                                                                                                                                                              |                               |
| 22 | Data management                                           | 19  | Plans for data entry, coding, security, and storage, including any related processes to promote data quality (eg, double data entry; range checks for data values). Reference to where details of data management procedures can be found, if not in the protocol                                                                                                                                            | Page 13                       |
| 23 |                                                           |     |                                                                                                                                                                                                                                                                                                                                                                                                              |                               |
| 24 |                                                           |     |                                                                                                                                                                                                                                                                                                                                                                                                              |                               |
| 25 |                                                           |     |                                                                                                                                                                                                                                                                                                                                                                                                              |                               |
| 26 | Statistical methods                                       | 20a | Statistical methods for analysing primary and secondary outcomes. Reference to where other details of the statistical analysis plan can be found, if not in the protocol                                                                                                                                                                                                                                     | Page 13-15                    |
| 27 |                                                           |     |                                                                                                                                                                                                                                                                                                                                                                                                              |                               |
| 28 |                                                           |     |                                                                                                                                                                                                                                                                                                                                                                                                              |                               |
| 29 |                                                           |     |                                                                                                                                                                                                                                                                                                                                                                                                              |                               |
| 30 |                                                           | 20b | Methods for any additional analyses (eg, subgroup and adjusted analyses)                                                                                                                                                                                                                                                                                                                                     | Page 14                       |
| 31 |                                                           |     |                                                                                                                                                                                                                                                                                                                                                                                                              |                               |
| 32 |                                                           | 20c | Definition of analysis population relating to protocol non-adherence (eg, as randomised analysis), and any statistical methods to handle missing data (eg, multiple imputation)                                                                                                                                                                                                                              | Page 13                       |
| 33 |                                                           |     |                                                                                                                                                                                                                                                                                                                                                                                                              |                               |
| 34 |                                                           |     |                                                                                                                                                                                                                                                                                                                                                                                                              |                               |
| 35 | <b>Methods: Monitoring</b>                                |     |                                                                                                                                                                                                                                                                                                                                                                                                              |                               |
| 36 |                                                           |     |                                                                                                                                                                                                                                                                                                                                                                                                              |                               |
| 37 | Data monitoring                                           | 21a | Composition of data monitoring committee (DMC); summary of its role and reporting structure; statement of whether it is independent from the sponsor and competing interests; and reference to where further details about its charter can be found, if not in the protocol. Alternatively, an explanation of why a DMC is not needed                                                                        | Page 13                       |
| 38 |                                                           |     |                                                                                                                                                                                                                                                                                                                                                                                                              |                               |
| 39 |                                                           |     |                                                                                                                                                                                                                                                                                                                                                                                                              |                               |
| 40 |                                                           |     |                                                                                                                                                                                                                                                                                                                                                                                                              |                               |
| 41 |                                                           |     |                                                                                                                                                                                                                                                                                                                                                                                                              |                               |
| 42 |                                                           |     |                                                                                                                                                                                                                                                                                                                                                                                                              |                               |
| 43 |                                                           |     |                                                                                                                                                                                                                                                                                                                                                                                                              |                               |
| 44 |                                                           |     |                                                                                                                                                                                                                                                                                                                                                                                                              |                               |
| 45 |                                                           |     |                                                                                                                                                                                                                                                                                                                                                                                                              |                               |
| 46 |                                                           |     |                                                                                                                                                                                                                                                                                                                                                                                                              |                               |

|    |                                 |     |                                                                                                                                                                                                                                  |                                                                                                                                                                                |
|----|---------------------------------|-----|----------------------------------------------------------------------------------------------------------------------------------------------------------------------------------------------------------------------------------|--------------------------------------------------------------------------------------------------------------------------------------------------------------------------------|
| 1  |                                 | 21b | Description of any interim analyses and stopping guidelines, including who will have access to these interim results and make the final decision to terminate the trial                                                          | Page 15                                                                                                                                                                        |
| 2  |                                 |     |                                                                                                                                                                                                                                  |                                                                                                                                                                                |
| 3  |                                 |     |                                                                                                                                                                                                                                  |                                                                                                                                                                                |
| 4  | Harms                           | 22  | Plans for collecting, assessing, reporting, and managing solicited and spontaneously reported adverse events and other unintended effects of trial interventions or trial conduct                                                | Page 15                                                                                                                                                                        |
| 5  |                                 |     |                                                                                                                                                                                                                                  |                                                                                                                                                                                |
| 6  |                                 |     |                                                                                                                                                                                                                                  |                                                                                                                                                                                |
| 7  | Auditing                        | 23  | Frequency and procedures for auditing trial conduct, if any, and whether the process will be independent from investigators and the sponsor                                                                                      | Page 13 mentions reporting and oversight in the trial. Decision for audit lies with the trial sponsor. This is not a drug trial so audit by regulatory agency is not involved. |
| 8  |                                 |     |                                                                                                                                                                                                                                  |                                                                                                                                                                                |
| 9  |                                 |     |                                                                                                                                                                                                                                  |                                                                                                                                                                                |
| 10 |                                 |     |                                                                                                                                                                                                                                  |                                                                                                                                                                                |
| 11 |                                 |     |                                                                                                                                                                                                                                  |                                                                                                                                                                                |
| 12 |                                 |     |                                                                                                                                                                                                                                  |                                                                                                                                                                                |
| 13 |                                 |     |                                                                                                                                                                                                                                  |                                                                                                                                                                                |
| 14 |                                 |     |                                                                                                                                                                                                                                  |                                                                                                                                                                                |
| 15 |                                 |     |                                                                                                                                                                                                                                  |                                                                                                                                                                                |
| 16 |                                 |     |                                                                                                                                                                                                                                  |                                                                                                                                                                                |
| 17 |                                 |     |                                                                                                                                                                                                                                  |                                                                                                                                                                                |
| 18 |                                 |     |                                                                                                                                                                                                                                  |                                                                                                                                                                                |
| 19 |                                 |     |                                                                                                                                                                                                                                  |                                                                                                                                                                                |
| 20 |                                 |     |                                                                                                                                                                                                                                  |                                                                                                                                                                                |
| 21 | <b>Ethics and dissemination</b> |     |                                                                                                                                                                                                                                  |                                                                                                                                                                                |
| 22 |                                 |     |                                                                                                                                                                                                                                  |                                                                                                                                                                                |
| 23 | Research ethics approval        | 24  | Plans for seeking research ethics committee/institutional review board (REC/IRB) approval                                                                                                                                        | Page 15                                                                                                                                                                        |
| 24 |                                 |     |                                                                                                                                                                                                                                  |                                                                                                                                                                                |
| 25 |                                 |     |                                                                                                                                                                                                                                  |                                                                                                                                                                                |
| 26 | Protocol amendments             | 25  | Plans for communicating important protocol modifications (eg, changes to eligibility criteria, outcomes, analyses) to relevant parties (eg, investigators, REC/IRBs, trial participants, trial registries, journals, regulators) | Page 15                                                                                                                                                                        |
| 27 |                                 |     |                                                                                                                                                                                                                                  |                                                                                                                                                                                |
| 28 |                                 |     |                                                                                                                                                                                                                                  |                                                                                                                                                                                |
| 29 |                                 |     |                                                                                                                                                                                                                                  |                                                                                                                                                                                |
| 30 | Consent or assent               | 26a | Who will obtain informed consent or assent from potential trial participants or authorised surrogates, and how (see Item 32)                                                                                                     | Page 9                                                                                                                                                                         |
| 31 |                                 |     |                                                                                                                                                                                                                                  |                                                                                                                                                                                |
| 32 |                                 |     |                                                                                                                                                                                                                                  |                                                                                                                                                                                |
| 33 |                                 |     |                                                                                                                                                                                                                                  |                                                                                                                                                                                |
| 34 |                                 | 26b | Additional consent provisions for collection and use of participant data and biological specimens in ancillary studies, if applicable                                                                                            | Page 15                                                                                                                                                                        |
| 35 |                                 |     |                                                                                                                                                                                                                                  |                                                                                                                                                                                |
| 36 |                                 |     |                                                                                                                                                                                                                                  |                                                                                                                                                                                |
| 37 | Confidentiality                 | 27  | How personal information about potential and enrolled participants will be collected, shared, and maintained in order to protect confidentiality before, during, and after the trial                                             | Page 15                                                                                                                                                                        |
| 38 |                                 |     |                                                                                                                                                                                                                                  |                                                                                                                                                                                |
| 39 |                                 |     |                                                                                                                                                                                                                                  |                                                                                                                                                                                |
| 40 | Declaration of interests        | 28  | Financial and other competing interests for principal investigators for the overall trial and each study site                                                                                                                    | Page 16                                                                                                                                                                        |
| 41 |                                 |     |                                                                                                                                                                                                                                  |                                                                                                                                                                                |
| 42 |                                 |     |                                                                                                                                                                                                                                  |                                                                                                                                                                                |

|    |                      |     |                                                                                                                 |                  |
|----|----------------------|-----|-----------------------------------------------------------------------------------------------------------------|------------------|
| 1  | Access to data       | 29  | Statement of who will have access to the final trial dataset, and disclosure of contractual agreements that     | Page 13          |
| 2  |                      |     | limit such access for investigators                                                                             |                  |
| 3  |                      |     |                                                                                                                 |                  |
| 4  | Ancillary and post-  | 30  | Provisions, if any, for ancillary and post-trial care, and for compensation to those who suffer harm from trial | Page 15          |
| 5  | trial care           |     | participation                                                                                                   |                  |
| 6  |                      |     |                                                                                                                 |                  |
| 7  | Dissemination policy | 31a | Plans for investigators and sponsor to communicate trial results to participants, healthcare professionals,     | Page 15-16       |
| 8  |                      |     | the public, and other relevant groups (eg, via publication, reporting in results databases, or other data       |                  |
| 9  |                      |     | sharing arrangements), including any publication restrictions                                                   |                  |
| 10 |                      |     |                                                                                                                 |                  |
| 11 |                      | 31b | Authorship eligibility guidelines and any intended use of professional writers                                  | We shall follow  |
| 12 |                      |     |                                                                                                                 | ICMJE guidelines |
| 13 |                      |     |                                                                                                                 |                  |
| 14 |                      | 31c | Plans, if any, for granting public access to the full protocol, participant-level dataset, and statistical code | No plans         |
| 15 |                      |     |                                                                                                                 |                  |
| 16 |                      |     |                                                                                                                 |                  |
| 17 | <b>Appendices</b>    |     |                                                                                                                 |                  |
| 18 |                      |     |                                                                                                                 |                  |
| 19 | Informed consent     | 32  | Model consent form and other related documentation given to participants and authorised surrogates              | Appendix-2 (for  |
| 20 | materials            |     |                                                                                                                 | editor only)     |
| 21 |                      |     |                                                                                                                 |                  |
| 22 | Biological           | 33  | Plans for collection, laboratory evaluation, and storage of biological specimens for genetic or molecular       | Page 15          |
| 23 | specimens            |     | analysis in the current trial and for future use in ancillary studies, if applicable                            |                  |
| 24 |                      |     |                                                                                                                 |                  |

\*It is strongly recommended that this checklist be read in conjunction with the SPIRIT 2013 Explanation & Elaboration for important clarification on the items. Amendments to the protocol should be tracked and dated. The SPIRIT checklist is copyrighted by the SPIRIT Group under the Creative Commons "[Attribution-NonCommercial-NoDerivs 3.0 Unported](https://creativecommons.org/licenses/by-nc-nd/3.0/)" license.

# BMJ Open

**The RATIONS (Reducing Activation of Tuberculosis by Improvement of Nutritional Status) study: A cluster randomized trial of nutritional support (food rations) to reduce TB-incidence in household contacts of patients with microbiologically confirmed pulmonary tuberculosis in communities with a high prevalence of undernutrition, Jharkhand, India**

|                                 |                                                                                                                                                                                                                                                                                                                                                                                                                                                                                                                                                                                                                                                                                                                                                                                                                                                                                                                                                                                     |
|---------------------------------|-------------------------------------------------------------------------------------------------------------------------------------------------------------------------------------------------------------------------------------------------------------------------------------------------------------------------------------------------------------------------------------------------------------------------------------------------------------------------------------------------------------------------------------------------------------------------------------------------------------------------------------------------------------------------------------------------------------------------------------------------------------------------------------------------------------------------------------------------------------------------------------------------------------------------------------------------------------------------------------|
| Journal:                        | <i>BMJ Open</i>                                                                                                                                                                                                                                                                                                                                                                                                                                                                                                                                                                                                                                                                                                                                                                                                                                                                                                                                                                     |
| Manuscript ID                   | bmjopen-2020-047210.R2                                                                                                                                                                                                                                                                                                                                                                                                                                                                                                                                                                                                                                                                                                                                                                                                                                                                                                                                                              |
| Article Type:                   | Protocol                                                                                                                                                                                                                                                                                                                                                                                                                                                                                                                                                                                                                                                                                                                                                                                                                                                                                                                                                                            |
| Date Submitted by the Author:   | 23-Apr-2021                                                                                                                                                                                                                                                                                                                                                                                                                                                                                                                                                                                                                                                                                                                                                                                                                                                                                                                                                                         |
| Complete List of Authors:       | Bhargava, Anurag ; Yenepoya Medical College Hospital, Medicine ; Yenepoya University, Center for Nutrition Studies<br>Bhargava, Madhavi; Yenepoya Medical College Hospital, Community Medicine; Yenepoya University, Center for Nutrition Studies<br>Velayutham , Banurekha ; National Institute of Research in Tuberculosis Thiruvengadam, Kannan; National Institute of Research in Tuberculosis Watson , Basilea; National Institute of Research in Tuberculosis Kulkarni, Bharati; National Institute of Nutrition; National Institute of Nutrition,<br>Singh, Manjula; Indian Council of Medical Research, ECD<br>Dayal, Rakesh; State TB Cell<br>Pathak , Rajeev ; World Health Organization, Technical Support Network<br>Mitra, Anindya; State Tuberculosis Demonstration and Training Centre<br>Rade, Kiran ; World Health Organisation Country Office for India<br>Sachdeva, KS; India Ministry of Health and Family Welfare, National Tuberculosis Elimination Programme |
| <b>Primary Subject Heading</b>: | Infectious diseases                                                                                                                                                                                                                                                                                                                                                                                                                                                                                                                                                                                                                                                                                                                                                                                                                                                                                                                                                                 |
| Secondary Subject Heading:      | Public health, Nutrition and metabolism, Global health                                                                                                                                                                                                                                                                                                                                                                                                                                                                                                                                                                                                                                                                                                                                                                                                                                                                                                                              |
| Keywords:                       | NUTRITION & DIETETICS, Tuberculosis < INFECTIOUS DISEASES, PREVENTIVE MEDICINE, Public health < INFECTIOUS DISEASES                                                                                                                                                                                                                                                                                                                                                                                                                                                                                                                                                                                                                                                                                                                                                                                                                                                                 |
|                                 |                                                                                                                                                                                                                                                                                                                                                                                                                                                                                                                                                                                                                                                                                                                                                                                                                                                                                                                                                                                     |

SCHOLARONE™  
Manuscripts



I, the Submitting Author has the right to grant and does grant on behalf of all authors of the Work (as defined in the below author licence), an exclusive licence and/or a non-exclusive licence for contributions from authors who are: i) UK Crown employees; ii) where BMJ has agreed a CC-BY licence shall apply, and/or iii) in accordance with the terms applicable for US Federal Government officers or employees acting as part of their official duties; on a worldwide, perpetual, irrevocable, royalty-free basis to BMJ Publishing Group Ltd ("BMJ") its licensees and where the relevant Journal is co-owned by BMJ to the co-owners of the Journal, to publish the Work in this journal and any other BMJ products and to exploit all rights, as set out in our [licence](#).

The Submitting Author accepts and understands that any supply made under these terms is made by BMJ to the Submitting Author unless you are acting as an employee on behalf of your employer or a postgraduate student of an affiliated institution which is paying any applicable article publishing charge ("APC") for Open Access articles. Where the Submitting Author wishes to make the Work available on an Open Access basis (and intends to pay the relevant APC), the terms of reuse of such Open Access shall be governed by a Creative Commons licence – details of these licences and which [Creative Commons](#) licence will apply to this Work are set out in our licence referred to above.

Other than as permitted in any relevant BMJ Author's Self Archiving Policies, I confirm this Work has not been accepted for publication elsewhere, is not being considered for publication elsewhere and does not duplicate material already published. I confirm all authors consent to publication of this Work and authorise the granting of this licence.

1  
2  
3 **The RATIONS (Reducing Activation of Tuberculosis by Improvement of Nutritional**  
4 **Status) study: A cluster randomized trial of nutritional support (food rations) to reduce**  
5 **TB-incidence in household contacts of patients with microbiologically confirmed**  
6 **TB-incidence in household contacts of patients with microbiologically confirmed**  
7 **pulmonary tuberculosis in communities with a high prevalence of undernutrition,**  
8 **Jharkhand, India**  
9  
10

11  
12 Anurag Bhargava,<sup>1,3,4</sup> Madhavi Bhargava<sup>2,3\*</sup>, Banurekha Velayutham<sup>5\*</sup>, Kannan  
13 Thiruvengadam<sup>6</sup>, Basilea Watson<sup>7</sup>, Bharati Kulkarni<sup>8</sup>, Manjula Singh<sup>9</sup>, Rakesh Dayal<sup>10</sup>,  
14 Rajeev Ranjan Pathak<sup>11</sup>, Anindya Mitra<sup>12</sup>, Kiran Rade<sup>13</sup>, Kuldeep Singh Sachdeva<sup>14</sup>  
15  
16

17 *\*contributed equally*  
18

19 <sup>1</sup> Department of Medicine, Yenepoya Medical College, Mangalore, India

20 <sup>2</sup> Department of Community Medicine, Yenepoya Medical College, Mangalore, India

21 <sup>3</sup> Center for Nutrition Studies, Yenepoya (Deemed to be University), Mangalore, India

22 <sup>4</sup> Department of Medicine, McGill University, Montreal, Canada

23 <sup>5</sup> Department of Clinical Research, ICMR-National Institute of Research in Tuberculosis,  
24 Chennai, India

25 <sup>6</sup> Statistics Section, Epidemiology Unit, ICMR-National Institute of Research in  
26 Tuberculosis, Chennai, India

27 <sup>7</sup> Electronic Data Processing Unit, ICMR-National Institute of Research in Tuberculosis,  
28 Chennai, India

29 <sup>8</sup> ICMR -National Institute of Nutrition, Hyderabad, India

30 <sup>9</sup> Epidemiology and Communicable Diseases Division, Indian Council of Medical Research,  
31 New Delhi, India

32 <sup>10</sup> State Tuberculosis Cell, Department of Health, Ranchi, India

33 <sup>11</sup> World Health Organization, Technical Support Network, Ranchi, India

34 <sup>12</sup> State Tuberculosis Cell, State TB Training and Demonstration Centre, Ranchi, India

35 <sup>13</sup> World Health Organization, Country Office for India, New Delhi, India

36 <sup>14</sup> National Tuberculosis Elimination Program, Central TB Division, New Delhi, India  
37  
38  
39  
40  
41  
42  
43  
44

45 **Corresponding author:** Dr Anurag Bhargava

46 **Postal Address:** Dept of Medicine, Yenepoya Medical College Campus, University Road,  
47 Deralakatte. 575018. Mangalore, Karnataka, India.  
48

49 **Email:** [anuragb17@gmail.com](mailto:anuragb17@gmail.com)  
50  
51

52 **Key Words:** food supplement, macronutrients, malnutrition, mortality, prevention  
53

54 **Word Count:** 4776  
55

56 **Protocol Version 3.1, Dated September 10, 2019**  
57  
58  
59

## Abstract

**Introduction:** India has the largest burden of cases and deaths related to TB. Undernutrition is the leading risk factor accounting for TB incidence, while severe undernutrition is a common risk factor for TB mortality in patients with TB in India. The impact of nutritional supplementation on TB incidence is unknown, while few underpowered studies have assessed its impact on TB mortality. We designed an open-label, field based cluster randomised trial to assess the impact of nutritional supplementation (with food rations) on TB-incidence in a group at higher risk of TB infection and disease, viz. household contacts (HHC) of patients with microbiologically confirmed pulmonary tuberculosis (PTB) in Jharkhand, a state with a high prevalence of undernutrition.

**Methods and Analysis:** We shall enroll 2800 adult patients with PTB of the national TB program, across 28 treatment units in 4 districts; and their approximately 11,200 eligible contacts. The sample size has 80% power to detect the primary outcome of 50% reduction in incidence of active TB in HHC over 2 years of follow-up. Patients and HHC in both the arms will undergo nutritional assessment and counseling. Patients will receive monthly food rations (supplying 1200 kilocalories and 52 proteins per day) and multivitamins along with anti-tubercular treatment. The HHC in the intervention arm will receive food rations (supplying 750 kilocalories and 23 g proteins per day) and multivitamins while HHC in control arm will be on usual diet. The secondary outcomes in HHC will include effects on nutritional status, non-TB infections. Secondary outcomes in patients are effects on TB mortality, adherence, adverse effects, nutritional and performance status. Sub-studies will examine micronutrient status and effects on dietary intake, body composition, muscle strength and immune function.

**Ethics and dissemination:** The Institutional Ethics Committee of ICMR-NIRT, Chennai approved the study (289/NIRT-IEC/2018). The results will be disseminated in publications and presentations.

**Trial registration number:** Clinical Trial Registry of India (CTRI/2019/08/020490).

### Strengths and Limitations of the study

- The RATIONS study is the first trial addressing undernutrition to reduce TB incidence in communities with high prevalence of poverty, undernutrition and low prevalence of HIV infection.
- It is the largest trial to evaluate the impact of nutritional support on TB mortality in a programme-based cohort of patients with pulmonary tuberculosis and a high prevalence of undernutrition.
- The follow-up period of two years will ensure detection of most cases of incident TB in household contacts and recurrence of TB in index cases.
- The quantum of food rations per participant is standardized, and in the absence of individual needs assessment, the extent to which the intervention meets individual needs is unknown.
- Food sharing in the families in the control arm and extra food consumption from other sources can't be ruled out



## Introduction

Tuberculosis (TB) is a global public health problem leading to significant morbidity and mortality, especially in low and middle income countries. An estimated 10 million people developed TB and 1.2 million (HIV-negative) people succumbed to it in 2019.<sup>1</sup> India was the major contributor to the global TB burden with an estimated 2.6 million new cases (27% of global) and 0.4 million (35% of global) TB-deaths in HIV-negative people in 2019.<sup>1</sup>

The United Nations Sustainable Development Goals-3 (SDG-3) has a target for ending the TB epidemic by 2030 and aims to reduce TB-incidence and TB-deaths by 80% and 90% of the 2015 levels respectively.<sup>2</sup> As per the National Strategic Plan (2017-25), the Revised National Tuberculosis Control Program (RNTCP) (renamed as National Tuberculosis Elimination Program, NTEP) in India has set an ambitious target of achieving the 2030 SDG milestone by 2025, five years ahead of the global target.<sup>3</sup>

The End TB strategy will require a mix of biomedical, public health and social interventions to achieve these goals.<sup>2</sup> The strategy requires acceleration of the current decline of 1.5% to 10-17% per year.<sup>4</sup> The present biomedical approach to TB prevention based on vaccination and TB preventive treatment (TPT) has its limitations. The efficacy of BCG vaccine is limited to prevention of severe forms of childhood TB.<sup>5</sup> The TPT with isoniazid in countries like India currently covers only select groups of contacts like under-six children and people living with HIV (PLHIV).<sup>6</sup> WHO recently made a conditional recommendation of offering TPT to all house-hold contacts (HHC).<sup>7</sup> However, there are considerable logistical and technical challenges in countries with a high burden of latent TB infection (LTBI).<sup>8</sup>

### Rationale for the trial:

The End TB strategy recognizes the need for new tools, interventions and strategies to address the problem of TB-incidence and adverse outcomes.<sup>2</sup> Globally an estimated 1.7 billion people or 23% of the population have LTBI which remains latent in 90% in presence of innate and cell mediated immunity.<sup>9</sup> Risk factors like HIV, undernutrition, uncontrolled diabetes, smoking and alcohol impair immunity, leading to active TB, and act as drivers of the TB epidemic. Undernutrition results from deficient intake or assimilation of energy and nutrients, often in association with disease-associated inflammation, and is a part of the broader spectrum of malnutrition, which includes both undernutrition, overweight and obesity

1  
2  
3 and deficiencies of micronutrients. Undernutrition in children is commonly defined by the  
4 well-accepted WHO indicators of low birth weight in newborns, underweight (low weight for  
5 age), stunting (low height for age) and wasting (low weight for height) in preschool children  
6 and by age and gender-specific cutoffs for BMI in those 6-18 years of age. In adults  
7 undernutrition is based on a low body mass index which reflects low body energy stores or  
8 chronic energy deficiency. The body mass index cut-off for underweight proposed by WHO  
9 of  $< 18.5 \text{ kg/m}^2$  for populations,<sup>10</sup> has also been accepted as a criterion for clinical diagnosis  
10 of malnutrition/undernutrition in a recent consensus statement.<sup>11</sup> In addition there have been  
11 proposals for diagnosis of undernutrition based on altered body composition, and for higher  
12 BMI cut-offs in patients undergoing significant involuntary weight loss, which require further  
13 validation.<sup>11, 12</sup>

14  
15  
16  
17  
18  
19  
20  
21  
22  
23 Undernutrition is the leading cause of impaired immunity globally,<sup>13</sup> with a consistent inverse  
24 exponential relationship between nutritional status measured by body mass index (BMI) and  
25 TB-incidence.<sup>14</sup> According to the global TB report 2020, undernutrition is a leading risk  
26 factor accounting for 2.2 million cases (19%), more than HIV and diabetes (accounting for  
27 0.76 and 0.35 million cases respectively).<sup>1</sup> Undernutrition is also a consistent risk factor for  
28 TB-mortality, regardless of HIV infection, and drug-susceptibility.<sup>15</sup> Its prevalence was as  
29 high as 23% in women and 19% in men (BMI $<18.5 \text{ kg/m}^2$ ) in the most recent National  
30 Family Health Survey (NFHS-4) in India.<sup>16</sup> It is higher in the poor, rural residents and those  
31 belonging to the scheduled castes and tribes, who also suffer a high burden of TB disease.<sup>16,</sup>  
32  
33  
34  
35  
36  
37  
38  
39  
40  
41  
42  
43  
44  
45  
46  
47  
48  
49  
50  
51  
52  
53  
54  
55  
56  
57  
58  
59  
60  
17 The WHO has estimated that 0.6 million cases of TB in India are attributable to  
undernutrition,<sup>1</sup> while other studies indicate that this estimate may be higher.<sup>18</sup> A majority of  
Indian patients with active TB have severe levels of undernutrition (macronutrient and  
micronutrient) which are associated with 2-4 fold higher risk of mortality.<sup>19</sup>

A single unit increase in BMI could reduce TB-incidence by 14%,<sup>14</sup> a modeling study has  
shown that TB-incidence and mortality could decline by 40-71% with nutritional  
interventions.<sup>20</sup> There is no randomized controlled trial on the effect of nutritional  
supplementation on TB-incidence. The studies on the impact of nutritional supplementation  
on TB mortality have been limited, small and underpowered.<sup>21</sup>

The RATIONS study is a cluster randomized trial to assess the impact of nutritional  
supplementation on TB-incidence among HHC of patients with microbiologically confirmed

1  
2  
3 pulmonary tuberculosis (PTB), living in a community with a high prevalence of  
4 undernutrition. They are a group at higher risk of TB infection and disease,<sup>22</sup> with a  
5 prevalence of 10-60 fold higher than in the general population.<sup>23</sup> TB-incidence was 4.8% in  
6 the HHC and 21.4% in child contacts in a previous study from Peru.<sup>24</sup> Food insecurity and  
7 undernutrition are strong and modifiable risk factors of TB in the HHC.<sup>25, 26</sup> The trial is  
8 being conducted in Jharkhand (meaning “Land of Forests”) a state in eastern India which has  
9 a high prevalence of undernutrition in children and adults. According to the National Family  
10 Health Survey-4 (2015-6), the state has the highest levels of underweight (47.8%), wasting  
11 (29.0%), and the second highest level of stunting(45.3%) in children under six years of age in  
12 India.<sup>16, 27</sup> Similarly, more than two of out of every five (41%) of adult rural women in  
13 Jharkhand had a body mass index of less than 18.5 kg/m<sup>2</sup>, and had the highest prevalence of  
14 anemia in adult women in India,(65.9%), which is largely related to nutritional deficiencies of  
15 iron and folic acid.<sup>16, 27</sup>

## 26 OBJECTIVES

27  
28  
29 The objectives and the outcome variables have been tabulated in table 1.

30  
31 **Primary objective:** To evaluate the effect of household nutritional supplementation in  
32 reducing TB-incidence among HHC of patients with microbiologically confirmed PTB.

33  
34 **Secondary objectives in HHC:** To evaluate the effect of nutritional supplementation on  
35 anthropometric indicators, and non-TB infectious morbidity and mortality.

36  
37 **Secondary outcomes in index cases:** To evaluate the effect of nutritional supplementation  
38 on adherence to treatment, mortality, frequency of adverse effects due to treatment,  
39 performance status of patients as measured by the Eastern Cooperative Oncology Group  
40 (ECOG),<sup>28</sup> and relapse of microbiologically confirmed TB on follow-up.

41  
42 **Sub-studies: Six sub-studies have been planned in a subset of index cases and HHC**

- 43  
44 a) Dietary intakes: To evaluate the difference in dietary intake of calories, proteins at  
45 baseline, and at the end of treatment in a subsample of the patients in both the arms.  
46  
47 b) Micronutrients: Vitamin A (serum retinol) and 25- hydroxyvitamin D [25(OH) D]  
48 levels in a subsample of index patient and HHC at baseline.  
49  
50  
51  
52  
53  
54  
55  
56  
57  
58  
59  
60

- 1  
2  
3 c) Body composition: To evaluate the difference in body composition between patients  
4 in the two arms at baseline and six months by a multifrequency bioelectric impedance  
5 analyzer (Bodystat Quadscan 4000).  
6  
7  
8  
9 d) Muscle function (grip strength) in a subsample of index cases at baseline, and end of  
10 treatment using a digital handheld dynamometer.  
11  
12  
13 e) Immune function: To evaluate select aspects of immunity in index patient and their  
14 HHC before and after treatment using the lymphocyte subsets [CD4,CD8, Natural  
15 Killer (NK) cells, B lymphocytes] and kinetics of interferon  $\gamma$  responses (by CD4 and  
16 CD8 cells) in a fourth generation-Interferon Gamma Release Assay (IGRA)  
17 (QuantiFERON-TB Gold Plus: QFT-Plus)  
18  
19  
20  
21  
22  
23 f) Qualitative study in a subset of stakeholders: A qualitative study will also be  
24 conducted in a subset of the stakeholders (patients, contacts, and field staff) at the end  
25 of the intervention period to assess the perceptions and experiences of nutrition  
26 intervention.  
27  
28  
29

## 30 **Methods and analysis**

### 31 **Study design and oversight:**

32  
33  
34  
35  
36 This is a cluster randomized open-label parallel-arm, superiority trial of nutritional  
37 supplementation in households with microbiologically confirmed patients with PTB in the  
38 state of Jharkhand, Eastern India. The study will randomise 28 Tuberculosis units (TUs) in  
39 four districts (Ranchi, East-Singhbhum, West-Singhbhum and Seraikela-Kharsawan) into  
40 control and intervention arms, each with 1400 adult PTB patients. It is supported by the India  
41 TB Research Consortium of the Indian Council of Medical Research (ICMR) and  
42 implemented by the Yenepoya (Deemed to be University), in association with the National  
43 Institute for Research in Tuberculosis (ICMR-NIRT), and National Institute of Nutrition  
44 (ICMR-NIN). The enrolment began on the August 16, 2019.  
45  
46  
47  
48  
49  
50

51  
52 Study setting: Under the NTEP, each district has one District TB centre and there are sub-  
53 district administrative units called TUs. The population is predominantly rural (75%) and  
54 indigenous communities classified as “scheduled tribes” (STs) who comprise 28% of the  
55 population (national-8%) and are historically disadvantaged groups with regard to social,  
56  
57  
58  
59  
60

1  
2  
3 economic and health indicators. According to NFHS-4, the prevalence of undernutrition in  
4 Jharkhand was 23.8% and 31.6% in adult men and women respectively, significantly higher  
5 than the national average.<sup>16</sup> A total of 44,000 TB cases were notified in the year 2017 when  
6 this trial was proposed.<sup>29</sup>  
7  
8  
9

### 10 **Eligibility criteria:**

11 The inclusion and exclusion criteria are mentioned in table 2.  
12

13  
14  
15  
16 Inclusion criteria: Adult patients ( $\geq 18$  years) with microbiologically confirmed PTB  
17 (irrespective of drug sensitivity) will constitute the index cases and will be eligible to enrol in  
18 the study. The HHC will be persons who have lived in the same house (and eating from the  
19 same kitchen), for one or more nights or for frequent or extended periods during the day with  
20 the index case during the preceding three months.  
21  
22

23  
24  
25 Exclusion criteria: An index case with no eligible HHC and any HHC currently on treatment  
26 for TB will be excluded.  
27  
28

### 29 **Study interventions:**

30  
31  
32 **Nature and quantity:** The study intervention includes macronutrients and micronutrient  
33 supplementation along with nutritional counseling as per national guidelines.<sup>30</sup> The index  
34 patients (in both arms) and the HHC (in the intervention arm) will receive a food basket and a  
35 recommended daily allowance of vitamins and micronutrients every month, as described in  
36 **Table-3**. This will be either delivered by the study staff or may be picked up from a depot as  
37 per the participant preference.  
38  
39

40  
41  
42  
43 **Frequency and duration:** The food basket will be provided for six months for new patients  
44 and 12 months for patients with MDR-TB (and their HHC in intervention arm). Extension of  
45 the intervention period to 12 months, for a patient with non-MDR-TB will be considered if  
46 there is evidence of undernutrition ( $\text{BMI} < 18.5 \text{ kg/m}^2$ ) in the index case even at the end of six  
47 months. Extension of rations to a HHC will be considered if an adult contact has a  $\text{BMI} < 16$   
48  $\text{kg/m}^2$ ; children ( $< 10$  years) have weight-for-age z-score  $< -2\text{SD}$  and adolescents (10-18 years)  
49 have BMI-for-age z-scores  $< -2\text{SD}$ .  
50  
51  
52  
53  
54

55  
56 **Nutritional counselling and assessing adherence:** The patients and the HHC will be  
57 counselled about the importance of a balanced diet for the nutritional recovery of the patient  
58  
59  
60

1  
2  
3 and the protection of the health status of the family. The families will be instructed about the  
4 optimal utilisation of the food rations in locally acceptable food recipes. The field staff will  
5 undertake follow-up visits to monitor weight gain (a proxy indicator for adherence) and  
6 check the empty packets of the milk powder as an indicator of consumption by the patient.  
7  
8  
9

### 10 11 **Co-interventions permitted during the trial**

12  
13 The patients as well as the HHC will continue to access public distribution system,  
14 supplementary feeding programs (Integrated Child Development Services Scheme, mid-day  
15 meals) as usual and additional INR 500/month as Direct Benefit Transfer availed by patients  
16 with TB in India. The eligible under-six children and those with HIV infection who have  
17 been advised by the NTEP staff to take chemoprophylaxis with isoniazid after an evaluation  
18 will continue to do so.  
19  
20  
21  
22  
23

### 24 25 **Risk assessment and referral**

26  
27 The patients will be evaluated for nutritional status, oxygen saturation, blood pressure and  
28 presence of complications at baseline and at follow-up. Patients with severe undernutrition  
29 with edema, extremely severe undernutrition ( $BMI < 14 \text{ kg/m}^2$ ), breathlessness or low oxygen  
30 saturation ( $SpO_2 < 94$ ) will be referred for inpatient care as per national guidelines.<sup>30</sup>  
31  
32  
33  
34

### 35 36 **Randomization and intervention allocation:**

37  
38 This is an open label trial, the participants and field staff, are not blinded after assignment.  
39 All the TUs from the selected districts were line-listed (list of TUs is available in  
40 supplementary file 1) and randomized equally to both the arms by computer generated  
41 random numbers using restricted randomization by the statistician at ICMR-NIRT, Chennai.  
42 The cluster allocation was kept confidential until the end of training of the field staff and the  
43 TUs were ready for implementation.  
44  
45  
46  
47  
48

### 49 50 **Enrolment of index cases and HHC**

51  
52 **Figure-1** describes the study flow. Consecutive patients diagnosed with microbiologically  
53 confirmed PTB in selected TUs will be enrolled after due consent process, during a 6-12  
54 month period. Information about the study will be given to the HHC during a home visit by  
55 the trial staff and enrolled after elicitation of voluntary written informed consent. The need  
56 for adherence to treatment and food rations, cooperation with study procedures, the stability  
57  
58  
59  
60

1  
2  
3 of residence and the willingness to permit home visits will be discussed with the index cases  
4 and HHC during enrolment.  
5  
6

### 7 **Baseline evaluation of index cases and HHC:**

8  
9  
10 The study procedures at baseline and follow-up are denoted in **Table-4**. Demographic  
11 characteristics including gender, occupation, caste, marital status, education, socio-economic  
12 assessment with an asset score, education will be noted. Presence of self-reported risk factors  
13 such as diabetes, alcohol consumption and tobacco use, family/past history of TB will also be  
14 recorded.  
15  
16  
17

18  
19 **Clinical examination of index cases:** Weight will be measured with a digital weighing scale  
20 (SECA 803) with accuracy of 100 gm, and height using a portable stadiometer (SECA 213)  
21 with accuracy of 0.1 cm using standard procedures. Mean of two measurements of weight  
22 will be taken for calculation of BMI. Undernutrition is defined as a Body mass index < 18.5  
23 kg/m<sup>2</sup> according to the underweight definition approved by the WHO.<sup>10</sup> Patients will further  
24 be categorized into mild underweight in case the BMI is 17.0-18.49 kg/m<sup>2</sup>, moderate  
25 underweight if the BMI is 16.0-16.99 kg/m<sup>2</sup>, severely underweight if the BMI is less than 16  
26 kg/m<sup>2</sup> as suggested by WHO.<sup>31</sup> An additional category of extremely severe underweight is  
27 used to classify those with a BMI of less than or equal to 14 kg/m<sup>2</sup>.<sup>32</sup> Mid-upper arm  
28 circumference (MUAC) will be measured to the nearest of 0.1 cm on the non-dominant arm,  
29 if the patient is unable to stand. Presence of edema, blood pressure using a digital instrument  
30 (OMRON) and oxygen saturation using pulse oximeter will be noted. Assessment of  
31 performance status will be done using ECOG scale as described in **Table-5**.<sup>28</sup>  
32  
33  
34  
35  
36  
37  
38  
39  
40  
41  
42

43 **Clinical examination in contacts:** This will consist of anthropometric measurements like  
44 weight, height, MUAC (if unable to stand and in under-five), presence of edema and BCG  
45 scar.  
46  
47

48  
49 **Laboratory evaluation of index cases:** The results of the sputum smear microscopy,  
50 cartridge based nucleic acid amplification test (CB-NAAT) - Gene Xpert MTB/RIF test,  
51 blood glucose and HIV tests (if available) will be retrieved from the NTEP records.  
52 Hemoglobin will be measured during the home visit using HemoCue Hb 201<sup>+</sup> using standard  
53 procedures and precautions. Chest X-ray (CXR) of patients at baseline will be done wherever  
54 feasible.  
55  
56  
57  
58  
59  
60



1  
2  
3 **Laboratory evaluation of HHC:** Symptom screening for TB will be done in all HHC and  
4 CXR will be done wherever feasible as per the NTEP guidelines.<sup>6</sup> In case of symptoms of  
5 presumptive TB or an abnormal CXR, the HHC will be referred for sputum examination.  
6 Children with symptoms/abnormal CXR will be referred for further evaluation by sputum  
7 smear and CB-NAAT (if cough is productive) and induced sputum/gastric aspirate, if unable  
8 to produce sputum at a referral hospital.  
9

#### 14 **Follow-up of index cases and HHC:**

16  
17 The enrolled index cases and their HHC will be followed-up for two years after the diagnosis  
18 of the index case. Jharkhand is a state with potential seasonal labor migration from rural  
19 areas. All attempts (including telephonic contact) will be made to retain follow-up in case of  
20 temporary migration with an in-person visit on their return. Participants will be termed as lost  
21 to follow-up if in-person or telephonic contact is not made for  $\geq 2$  months in the intervention  
22 period; or for  $\geq 6$  months in the follow-up period. All participants lost to follow-up will be  
23 approached for an end of study evaluation to ascertain information on the primary and  
24 relevant secondary outcomes.  
25  
26

27  
28 The schedule of follow-up and assessments is described in **Table-4**. Evaluation will be done  
29 for current symptoms, any adverse effect related to treatment, adherence to treatment and  
30 rations. All HHC will be evaluated for symptoms of active TB on each visit, consumption of  
31 rations (in intervention arm), and review of non-TB infectious morbidity and mortality based  
32 on symptoms, hospitalization, or death.  
33  
34

35  
36 Patients will undergo repeat sputum examination on follow-up as per NTEP guidelines.  
37 Contacts that develop any symptoms of active TB (PTB or EPTB) will undergo appropriate  
38 investigations.  
39  
40

41  
42 The cases of active TB in HHC will be classified as co-prevalent or incident according to the  
43 time of diagnosis of the index case. A co-prevalent case is a HHC diagnosed with active TB  
44 (microbiologically confirmed active TB or as clinically diagnosed tuberculosis) at the  
45 baseline, or within two month of the baseline screening and evaluation of the HHC. An  
46 incident case is a new case of TB in a HHC (microbiologically confirmed active TB or as  
47 clinically diagnosed) that was diagnosed more than two months following the initial negative  
48  
49  
50  
51  
52  
53  
54  
55  
56  
57  
58  
59  
60



1  
2  
3 screening and evaluation. The definition of microbiologically confirmed case and clinically  
4 diagnosed cases is as per **Table-6**.

### 7 **Qualitative study about the nutritional intervention**

9  
10 We will use a phenomenological approach to generate qualitative data through the in-depth  
11 interview of TB patients and their HHC. The participants will be purposively selected till  
12 conceptual saturation and triangulation is reached, and will be interviewed using topic guides  
13 prepared in line with the study objectives. Interviews will be tape-recorded, transcribed  
14 verbatim, and translated to English. Open Code software will be used to facilitate analysis.  
15 This sub-study will be conducted at the end of the intervention period.

### 21 **Discontinuation of study intervention and withdrawal of study participants**

23  
24 Study participants will be asked about consumption of rations and micronutrients at every  
25 visit. Rarely, they may choose to discontinue consumption of the study intervention during  
26 the intervention period, due to an unrelated illness or perceived adverse effects. The reasons  
27 for their discontinuation of study intervention will be recorded but these participants will  
28 remain in the study and undergo protocol-specified follow up procedures. However if the  
29 participants also explicitly withdraws consent for follow up and collection of additional  
30 information in addition to discontinuation of consumption of study intervention, the  
31 withdrawal of consent will be recorded, and only the data collected prior to withdrawal of  
32 consent will be used in the study. Study participants will be free to withdraw at any time  
33 during the trial. The reasons for the withdrawal will be documented which may include  
34 refusal of follow up, lost to follow up, participant request, death, or if the study sponsors  
35 decide to stop or cancel the study. Unless the participants withdraw consent for further follow  
36 up, attempts will be made to ascertain outcomes as mentioned earlier.

### 47 **Study outcomes**

49  
50 The primary outcome in HHC is the difference in number of incident cases of active TB (all  
51 forms) in the two arms by active case finding over a follow-up period of two years. The  
52 secondary outcomes are improvement in the nutritional indicators over six months, frequency  
53 of malaria, diarrhea, lower respiratory tract infection, hospitalization with fever of any cause,  
54 or death with fever of any cause less than 15 days in duration in both the trial arms.

1  
2  
3 The secondary outcomes in the index cases are successful treatment completion, TB related  
4 deaths, improvement in performance status, adverse effects, and recurrence of TB during two  
5 years follow-up. The ascertainment of primary outcomes of incident TB in contacts is by  
6 NTEP program staff (not part of the trial team).  
7  
8  
9

### 10 **Participant timeline:**

11  
12  
13 The trial has a preparatory phase of three months for site selection, staff recruitment and  
14 training, and preparation of manual of procedures. The intervention phase will be six months  
15 for drug-susceptible cases and 12 months in the MDR-TB. The follow-up phase will continue  
16 for two years from the initiation of treatment.  
17  
18  
19

### 20 **Sample size estimation**

21  
22  
23 The estimated incidence rate of PTB in the general population in India is 217/100,000  
24 population (0.208 %).<sup>4</sup> The incidence rate-ratio of TB in HHC is 15.9 (IQR, 2.6-21.4)  
25 compared to the general population, translating into 4% incidence in the HHC.<sup>22</sup> Assuming a  
26 higher burden of TB and undernutrition in India, and recent emerging evidence of  
27 significantly higher risk of TB disease following infection in close contacts,<sup>33</sup> we considered  
28 TB-incidence in HHC to be 5% over the study period. We assume 50% reduction in TB-  
29 incidence at household level with intervention.<sup>34</sup>  
30  
31  
32  
33  
34  
35

36  
37 Our sample size considers design effect at three levels; the TU level, the families of index  
38 cases and finally their HHC.<sup>35</sup> We assumed approximately 100 index cases (80-120) and their  
39 families in a cluster per annum, a correlation coefficient of 0.2 for the outcome in HHC and  
40 0.01 between members of the same cluster,<sup>22</sup> and thus a design effect of 6.75. Thus a sample  
41 size of 28 clusters with 2800 patients and approximately 11,200 contacts equally distributed  
42 in both the arms would have 80% power to detect 50% reduction of TB-incidence in  
43 intervention arm with a type-1 error of 5%.  
44  
45  
46  
47  
48

49  
50 The sub-study sample sizes were estimated based on the assumptions related to the objective  
51 of the sub-study. The sample size of 250 cases (125/arm) and 250 contacts (125/arm) was  
52 based on the prevalence of multiple vitamin deficiencies in patients with PTB,<sup>36</sup> and the  
53 prevalence of Vitamin D deficiency in apparently healthy individuals in India.<sup>37</sup>  
54  
55  
56  
57  
58  
59  
60

1  
2  
3 A sample size of 352 contacts (176/arm) was assumed to be needed to detect a 10%  
4 difference in mean CD4 counts in the contacts of the two arms after six months of  
5 intervention, with 90% power. This proportion is about 3% of the HHC and we will enroll a  
6 similar 3% of the index cases (50/arm) to assess determine the immune function at baseline  
7 and after intervention in them.  
8  
9  
10

11  
12 The sample size for the dietary intake sub-study assumes a standard deviation of 525  
13 KCalories, over a wide range of caloric intakes.<sup>38</sup> Assuming a mean difference in caloric  
14 intake between both the arms as 400 KCalories and 20% loss to follow-up, we will enroll 45  
15 contacts and 45 patients in each arm.  
16  
17  
18  
19

### 20 **Data collection, management**

21  
22 The data will be collected by field investigators working in close collaboration with the  
23 NTEP staff. Study data will be collected and managed using REDCap, an electronic data  
24 capture tools<sup>39</sup> hosted at ICMR-NIRT. The data capture will be done real time using a  
25 handheld device, will be subjected to range and logic checks and will be monitored by the  
26 project technical team. A periodic quality check will be performed for accuracy and  
27 completeness by the data management team at ICMR-NIRT, which will minimize missing  
28 data. Appropriate imputation methods will be used for missing values in the analysis if  
29 required. The final dataset will be accessible to the investigators based in Yenepoya (deemed  
30 to be University) and ICMR-NIRT and will be deposited in electronic format with the trial  
31 sponsor, ICMR, at the end of the study.  
32  
33  
34  
35  
36  
37  
38  
39  
40

41 All essential trial documents, consent forms will be stored under lock and key at the  
42 recruitment site under the supervision of investigators. Electronic data will be password  
43 protected and the records will be retained for a period of five years after completion of the  
44 study.  
45  
46  
47  
48

49 We will constitute a data safety management board (DSMB) comprising of subject experts in  
50 clinical trials, TB and nutrition along with independent biostatistician and ethicist.  
51  
52

53 Apart from the regular monitoring by the project team, there is periodic reporting to the  
54 ICMR, to the IEC of ICMR-NIRT, the trial advisory committee and the DSMB.  
55  
56

### 57 **Data analysis:**

1  
2  
3 The primary outcome is TB incidence among contacts, expressed as events per 100,000  
4 person-months of follow-up. Follow-up is defined as time from date of randomization until  
5 the earliest endpoint, i.e. documented TB disease or censoring (death, loss to follow-up or  
6 end of the study).  
7  
8  
9

10  
11 Cox proportional hazards model, accounting for varying follow-up times and clustering  
12 effect, will be used to compare the rate of progression of TB infection to disease among  
13 contacts between the arms and to assess its association with risk factors. Unadjusted and  
14 adjusted hazard ratios along with their 95% confidence intervals will be reported. The crude  
15 effect of the intervention will be calculated using Kaplan-Meier survival plots and compared  
16 using the log rank test.  
17  
18  
19  
20  
21

22 The primary analysis will be intention to treat. Per-protocol analysis will also be done. The  
23 models will be adjusted for relevant risk factors (age, smoking, diabetes, duration of  
24 exposure) during the sensitivity analysis.  
25  
26  
27

28 The secondary outcomes of change in weight and z-scores in patients and HHC, and the  
29 performance status in patients, will be compared using unpaired and paired t-tests and  
30 Bonferroni correction for multiple comparisons. Linear mixed regression models adjusted for  
31 age, gender, TU, caste, asset score, family size, and baseline weight will be done.  
32  
33  
34  
35

36 The secondary outcomes of frequency of non-TB morbidities and deaths due to infections in  
37 the HHC, and the frequency of deaths, adverse effects, defaults, relapse in the index cases in  
38 the two arms will be compared using the chi-square test and Cox proportional hazards  
39 regression for time to first event.  
40  
41  
42  
43

44 The patients enrolled in the sub-studies will be compared in their baseline characteristics as  
45 these have been drawn by non-random sampling of patients from the main trial. The changes  
46 in dietary intake of calories and proteins, body composition parameters and lymphocyte will  
47 be assessed among index and contacts. Interactions between treatment and change in  
48 nutritional and body composition indicators will be tested using likelihood ratio tests.  
49  
50  
51  
52

53 The effect of subgroups will be analysed based on age, gender, caste, residence, BMI, asset  
54 score, and possession of below poverty line card, alcohol use, and family history of TB. A p  
55 value <0.05 (two-tailed) will be considered statistically significant. All data will be analysed  
56 using STATA version 16.1 (StataCorp, Texas, USA).  
57  
58  
59  
60

1  
2  
3 Interim analysis will be performed on attaining 50% of outcomes in the control arm  
4 (approximately 230 cases) with a p-value<0.0054 as statistically significant. The final  
5 analysis will be done at the end of attainment of planned sample size and completion of  
6 follow-up, considering a p-value <0.0492 as statistically significant.  
7  
8  
9

## 10 **Harm**

11  
12  
13 The intervention involves locally consumed food items which are part of the daily diet and  
14 hence no specific adverse events are expected. Patients who have lactose intolerance will be  
15 offered alternatives. The possibility of 're-feeding syndrome' in severely undernourished  
16 patients will be prevented by training the field staff to offer a graded increase in food intake  
17 in such patients.  
18  
19  
20  
21  
22

23 **Ethics, participant information and consent:** Ethics clearance has been obtained from  
24 Institutional Ethics Committee of ICMR-NIRT, Chennai (NIRT-IEC no: 2018020), to which  
25 all the amendments of the protocol will be communicated. Patients and their HHC who are  
26 enrolled in the study will receive a detailed 'Participant Information Sheet' in local language  
27 before administering the informed consent. A separate consent form will be used for the adult  
28 participants enrolled in the sub-study on micronutrient status and immune function. No blood  
29 specimen will be stored for any future use. A unique numerical code will be allocated to each  
30 participant for purpose of their identification and for maintaining confidentiality. Personal  
31 identifiers will be deleted in the final research database for analysis. All forms with personal  
32 identifiers will be under lock and key with the trial team.  
33  
34  
35  
36  
37  
38  
39  
40

## 41 **Responsibility for ancillary care during the trial**

42  
43 Any index case or HHC found to have an acute illness other than TB during the follow-up  
44 visits will be facilitated by the field staff to reach the nearest government health set-up.  
45  
46  
47

## 48 **Patient and public involvement statement**

49  
50 Patients were not directly involved in the development of the research question. The  
51 components of food basket were discussed with community health workers during the  
52 preparatory phase of the trial. The training of the field staff involved interaction with TB  
53 survivors and two of the field staff in the trial are TB-survivors.  
54  
55  
56  
57

## 58 **Dissemination Plan**

1  
2  
3 The impact of nutritional support on TB incidence and outcomes in this trial will be of  
4 relevance to NTEP, India. The results will be disseminated through publications, conference  
5 presentations and briefs for the program managers, Jharkhand department of Health, policy  
6 makers and other stakeholders. We intend to share the published results in simple language  
7 with the participants and community leaders.  
8  
9  
10  
11

### 12 **Trial status**

13  
14  
15 The trial was started on 16<sup>th</sup> of August 2019 after trial registration (CTRI/2019/08/020490)  
16 and an intensive two weeks training of 56 field staff, two project consultants and one project  
17 director by State NTEP staff, nutritionist, and specialists in TB, ethicist, TB-champions,  
18 communication experts and social scientists. We have enrolled 2488 index cases and 9125  
19 HHC in the trial as of 31<sup>st</sup> of October, 2020.  
20  
21  
22  
23

### 24 **Author contributions**

25  
26  
27 AB conceived the research question. AB, MB, BV, TK, BK designed the study protocol and  
28 drafted the manuscript. BW, MS, RD, AM, RRP, KR, KSS reviewed the study protocol and  
29 provided critical intellectual content. All authors carefully read and approved the final  
30 version of the manuscript.  
31  
32

### 33 **Acknowledgements**

34  
35 We wish to gratefully acknowledge the critical inputs of Professor Dick Menzies, Director  
36 McGill International TB Centre, and Professor Andrea Benedetti, of McGill University  
37 Departments of Epidemiology, Biostatistics and Occupational Health and Medicine, on early  
38 drafts of the protocol.  
39

40  
41 We also wish to thank Dr. Soumya Swaminathan, former Director-General Indian Council of  
42 Medical Research and Chief Scientist (WHO) for her support in exploring nutritional  
43 interventions to address the TB and undernutrition syndemic in India.  
44

### 45 **Funding statement:**

46  
47 The RATIIONS study is supported by the India Tuberculosis Research Consortium, Indian  
48 Council of Medical Research, New Delhi, India vide grant no. 5/8/5/57/TB Consortium/Call  
49 India Project/2017/ECD-1. The funder has no role in the study design and writing of the  
50 protocol, and will not have any role in collection, management, analysis, and interpretation of  
51 data; the writing and the decision to submit any future reports for publication.  
52  
53

### 54 **Competing interests statement:**

55  
56 The authors state that they have no competing interests to declare.  
57  
58  
59  
60

1  
2  
3 **Figure 1: Study flow for the RATIONS Trial**  
4  
5  
6  
7  
8  
9  
10  
11  
12  
13  
14  
15  
16  
17  
18  
19  
20  
21  
22  
23  
24  
25  
26  
27  
28  
29  
30  
31  
32  
33  
34  
35  
36  
37  
38  
39  
40  
41  
42  
43  
44  
45  
46  
47  
48  
49  
50  
51  
52  
53  
54  
55  
56  
57  
58  
59  
60

For peer review only

**References:**

1. Global Tuberculosis Report 2020. Geneva: World Health Organization; 2020.
2. World Health Organization. Implementing the End TB strategy: The essentials. WHO/HTM/TB/2015.31. Geneva: WHO; 2015.
3. National Strategic Plan for TB Elimination (2017-2025). New Delhi Central TB Division, Ministry of Health and Family Welfare, Government of India; 2017.
4. Global Tuberculosis Report 2016. Geneva: World Health Organization; 2016.
5. Mangtani P, Abubakar I, Ariti C, Beynon R, Pimpin L, Fine PE, et al. Protection by BCG vaccine against tuberculosis: a systematic review of randomized controlled trials. Clin Infect Dis. 2014;58(4):470-80.



6. Revised National TB Control Programme :Technical and Operational Guidelines for Tuberculosis Control in India. New Delhi: Central TB Division,Ministry of Health and Family Welfare; 2016.
7. WHO consolidated guidelines on tuberculosis. Module 1: prevention – tuberculosis preventive treatment. Geneva: World Health Organization; 2020.
8. Paton NI, Borand L, Benedicto J, Kyi MM, Mahmud AM, Norazmi MN, et al. Diagnosis and management of latent tuberculosis infection in Asia: Review of current status and challenges. *Int J Infect Dis.* 2019;87:21-9.
9. Houben RM, Dodd PJ. The Global Burden of Latent Tuberculosis Infection: A Re-estimation Using Mathematical Modelling. *PLoS Med.* 2016;13(10):e1002152.
10. Physical status: The use and interpretation of anthropometry: report of a WHO expert committee. Geneva: World Health Organization,; 1995.
11. Cederholm T, Bosaeus I, Barazzoni R, Bauer J, Van Gossum A, Klek S, et al. Diagnostic criteria for malnutrition - An ESPEN Consensus Statement. *Clin Nutr.* 2015;34(3):335-40.
12. Cederholm T, Jensen GL, Correia M, Gonzalez MC, Fukushima R, Higashiguchi T, et al. GLIM criteria for the diagnosis of malnutrition - A consensus report from the global clinical nutrition community. *Clin Nutr.* 2019;38(1):1-9.
13. Bhargava A. Undernutrition, nutritionally acquired immunodeficiency, and tuberculosis control. *BMJ [Internet].* 2016; 355. Available from: <http://www.bmj.com/content/bmj/355/bmj.i5407.full.pdf>.
14. Lonroth K, Williams BG, Cegielski P, Dye C. A consistent log-linear relationship between tuberculosis incidence and body mass index. *Int J Epidemiol.* 2010;39(1):149-55.
15. Waitt CJ, Squire SB. A systematic review of risk factors for death in adults during and after tuberculosis treatment. *The International Journal of Tuberculosis and Lung Disease.* 2011;15(7):871-85.
16. International Institute for Population Sciences, ICF. National Family Health Survey (NFHS-4), 2015–16: India. IIPS Mumbai, India; 2017.
17. Mazumdar S, Satyanarayana S, Pai M. Self-reported tuberculosis in India: evidence from NFHS-4. *BMJ global health.* 2019;4(3):e001371.
18. Bhargava A, Benedetti A, Oxlade O, Menzies D, Pai M. Undernutrition and the incidence of tuberculosis in India: National and subnational estimates of the population-attributable fraction related to undernutrition. *Natl Med J India.* 2014;27(3):128-33.
19. Bhargava A, Chatterjee M, Jain Y, Chatterjee B, Kataria A, Bhargava M, et al. Nutritional status of adult patients with pulmonary tuberculosis in rural central India and its association with mortality. *PLoS One.* 2013;8(10):e77979.
20. Oxlade O, Huang CC, Murray M. Estimating the Impact of Reducing Under-Nutrition on the Tuberculosis Epidemic in the Central Eastern States of India: A Dynamic Modeling Study. *PLoS One.* 2015;10(6):e0128187.
21. Grobler L, Nagpal S, Sudarsanam TD, Sinclair D. Nutritional supplements for people being treated for active tuberculosis. *Cochrane Database Syst Rev.* 2016(6):CD006086.
22. Fox GJ, Barry SE, Britton WJ, Marks GB. Contact investigation for tuberculosis: a systematic review and meta-analysis. *Eur Respir J.* 2013;41(1):140-56.
23. Enarson DA, Fanning EA, Allen EA. Case-finding in the elimination phase of tuberculosis: high risk groups in epidemiology and clinical practice. *Bull Int Union Tuberc Lung Dis.* 1990;65(2-3):73-4.
24. Grandjean L, Gilman RH, Martin L, Soto E, Castro B, Lopez S, et al. Transmission of Multidrug-Resistant and Drug-Susceptible Tuberculosis within Households: A Prospective Cohort Study. *PLoS Med.* 2015;12(6):e1001843; discussion e.
25. Jubulis J, Kinikar A, Ithape M, Khandave M, Dixit S, Hotalkar S, et al. Modifiable risk factors associated with tuberculosis disease in children in Pune, India. *Int J Tuberc Lung Dis.* 2014;18(2):198-204.



- 1  
2  
3  
4  
5  
6  
7  
8  
9  
10  
11  
12  
13  
14  
15  
16  
17  
18  
19  
20  
21  
22  
23  
24  
25  
26  
27  
28  
29  
30  
31  
32  
33  
34  
35  
36  
37  
38  
39  
40  
41  
42  
43  
44  
45  
46  
47  
48  
49  
50  
51  
52  
53  
54  
55  
56  
57  
58  
59  
60
26. O. Morán-Mendoza, S. A. Marion, K. Elwood, D. Patrick, FitzGerald JM. Risk factors for developing tuberculosis: a 12-year follow-up of contacts of tuberculosis cases. *International Journal of Tuberculosis and Lung Disease*. 2010;14(9):1112-9.
27. Food and Nutrition Security Analysis, India, 2019. Ministry of Statistics and Programme Implementation, The World Food Programme; 2019.
28. de Valliere S, Barker RD. Poor performance status is associated with early death in patients with pulmonary tuberculosis. *Trans R Soc Trop Med Hyg*. 2006;100(7):681-6.
29. India TB Report 2018. New Delhi: Central TB Division, Ministry of Health and Family Welfare, Government of India.; 2018.
30. Guidance document on nutritional care and support for patients with tuberculosis in India. Central TB Division, Ministry of Health and Family Welfare, Government of India; 2017.
31. Consultation WE. Appropriate body-mass index for Asian populations and its implications for policy and intervention strategies. *Lancet (London, England)*. 2004;363(9403):157-63.
32. Manual of nutritional therapeutics. 5th ed: Lippincott Williams & Wilkins; 2008.
33. Trauer JM, Moyo N, Tay EL, Dale K, Ragonnet R, McBryde ES, et al. Risk of Active Tuberculosis in the Five Years Following Infection . . . 15%? *Chest*. 2016;149(2):516-25.
34. Bhargava A, Pai M, Bhargava M, Marais BJ, Menzies D. Can social interventions prevent tuberculosis?: the Papworth experiment (1918-1943) revisited. *Am J Respir Crit Care Med*. 2012;186(5):442-9.
35. Teerenstra S, Lu B, Preisser JS, van Achterberg T, Borm GF. Sample size considerations for GEE analyses of three-level cluster randomized trials. *Biometrics*. 2010;66(4):1230-7.
36. Oh J, Choi R, Park HD, Lee H, Jeong BH, Park HY, et al. Evaluation of vitamin status in patients with pulmonary tuberculosis. *J Infect*. 2017;74(3):272-80.
37. Beloyartseva M, Mithal A, Kaur P, Kalra S, Baruah MP, Mukhopadhyay S, et al. Widespread vitamin D deficiency among Indian health care professionals. *Archives of osteoporosis*. 2012;7:187-92.
38. Hall JC. A method for the rapid assessment of sample size in dietary studies. *Am J Clin Nutr*. 1983;37(3):473-7.
39. Harris PA, Taylor R, Thielke R, Payne J, Gonzalez N, Conde JG. Research electronic data capture (REDCap)--a metadata-driven methodology and workflow process for providing translational research informatics support. *Journal of biomedical informatics*. 2009;42(2):377-81.

**Table-1: Objectives of the RATIONS trial and the outcome variables**

| Objective                                                                                                                           | Outcome variables                                                                                                                                                                  | Index case | HHC |
|-------------------------------------------------------------------------------------------------------------------------------------|------------------------------------------------------------------------------------------------------------------------------------------------------------------------------------|------------|-----|
| <b>Primary Objective</b>                                                                                                            |                                                                                                                                                                                    |            |     |
| Effect of household nutritional supplementation in reducing TB incidence among HHC of patients with microbiologically confirmed PTB | Difference in number of incident cases of active TB (all forms) in the two arms detected by active case finding over a follow-up period of two years after diagnosis of index case |            | ✓   |
| <b>Secondary Objectives</b>                                                                                                         |                                                                                                                                                                                    |            |     |
| Effect of nutritional supplementation on anthropometric indicators over 6 months                                                    | Anthropometric indicators such as weight and Body Mass Index                                                                                                                       | ✓          | ✓   |
| Non-TB infectious morbidity and mortality in HHC in both the arms                                                                   | Malaria, diarrhea, lower respiratory tract infection, hospitalization with fever of any cause, or death with fever of any cause <15 days in duration                               |            | ✓   |
| Adherence to anti-TB therapy                                                                                                        | Proportion completing the therapy successfully                                                                                                                                     | ✓          |     |
| Mortality during treatment                                                                                                          | Proportion of index cases who died during treatment                                                                                                                                | ✓          |     |
| Adverse effects                                                                                                                     | Severe adverse effects with TB drugs                                                                                                                                               | ✓          |     |
| Recurrence of TB within 2 years after cure                                                                                          | Relapse rate of microbiologically confirmed TB                                                                                                                                     | ✓          |     |
| Performance status                                                                                                                  | Change in ECOG scale at 1,2 and 6 months compared to baseline                                                                                                                      | ✓          |     |
| <b>Dietary Substudy</b>                                                                                                             |                                                                                                                                                                                    |            |     |
| Evaluate the difference in dietary intake of calories and proteins                                                                  | Calorie and protein intake at baseline, and end of treatment in intervention and control arms                                                                                      | ✓          | ✓   |
| <b>Micronutrient substudy</b>                                                                                                       |                                                                                                                                                                                    |            |     |
| Assess Vitamin A and D [25(OH)D]                                                                                                    | Level of vitamin A and D at baseline                                                                                                                                               | ✓          | ✓   |

|                                                      |                                                                                                                                                                      |   |   |
|------------------------------------------------------|----------------------------------------------------------------------------------------------------------------------------------------------------------------------|---|---|
| levels                                               |                                                                                                                                                                      |   |   |
| <b>Body composition substudy</b>                     |                                                                                                                                                                      |   |   |
| Evaluation of body composition                       | Estimate fat-free mass, fat mass, and other Bioimpedance analysis parameters at baseline, and 6 months after treatment                                               | ✓ | ✓ |
| <b>Substudy on grip strength</b>                     |                                                                                                                                                                      |   |   |
| Evaluate muscle strength using hand grip dynamometer | Grip strength at baseline and 6 months                                                                                                                               | ✓ |   |
| <b>Substudy of immune function</b>                   |                                                                                                                                                                      |   |   |
| Evaluate cellular immunity in patients and HHC       | Lymphocyte subsets (CD4,CD8, Natural Killer cells, B lymphocytes), 4 <sup>th</sup> generation Interferon Gamma Release Assay (IGRA) at baseline and end of treatment | ✓ | ✓ |

HHC=household contact; PTB=pulmonary tuberculosis; MDR=multi-drug resistant tuberculosis; ECOG=eastern co-operative oncology group

**Table-2: Eligibility criteria for RATIONS trial participants**

| <b>Index cases</b>                                                         | <b>Household contacts (HHC)</b>                                                                                                                                                                     |
|----------------------------------------------------------------------------|-----------------------------------------------------------------------------------------------------------------------------------------------------------------------------------------------------|
| <b>Inclusion Criteria</b>                                                  |                                                                                                                                                                                                     |
| Patients $\geq 18$ years with microbiologically confirmed pulmonary TB     | Persons living in the same house, eating from same kitchen as index case for $\geq$ one night or for frequent or extended periods during the day during the 3 months before diagnosis in index case |
| <b>Exclusion criteria</b>                                                  |                                                                                                                                                                                                     |
| Non eligible HHC                                                           | Current smear or GeneXpert or LPA or culture confirmed TB                                                                                                                                           |
| Time interval between initiation of treatment and enrolment is $> 14$ days | Clinically diagnosed pulmonary or extra-pulmonary TB and currently on treatment                                                                                                                     |

LPA = Line probe assay

**Table-3: Nutritional supplementation in the RATIONS trial**

|                                                                         | <b>Intervention arm</b>                                                                                                                                                                      | <b>Control arm</b>                                                                                                                                                                           |
|-------------------------------------------------------------------------|----------------------------------------------------------------------------------------------------------------------------------------------------------------------------------------------|----------------------------------------------------------------------------------------------------------------------------------------------------------------------------------------------|
| Index case*,<br>quantity per<br>person per month                        | Nutritional counselling<br>5 kg of rice<br>3 kg roasted Bengal gram powder<br>(locally called as <i>sattu</i> )<br>1.5 kg of milk powder<br>500 ml vegetable oil<br>One RDA of micronutrient | Nutritional counselling<br>5 kg of rice<br>3 kg roasted Bengal gram powder<br>(locally called as <i>sattu</i> )<br>1.5 kg of milk powder<br>500 ml vegetable oil<br>One RDA of micronutrient |
| Household<br>contact <sup>§</sup> , quantity<br>per person per<br>month | Nutritional counselling<br>5 kg rice<br>1.5kg pulses (split pigeon peas)<br>One RDA of micronutrient per<br>adult/adolescent HHC<br>Half of this amount for children less<br>than 10 years.  | Nutritional counselling<br>Usual food assistance available<br>to eligible households through<br>public distribution system                                                                   |

RDA = Recommended Dietary Allowance; \* approximately 1200 kcal of energy and 52 gm proteins per day. § approximately 750 kcal of energy and 23 gm of proteins per day.

Table 4: Schedule of enrolment, assessments at baseline and follow-up in the RATIONS trial

|                                    | Investigations                                                                                             | Base-line | M1 | M2 | M3 | M4 | M5 | M6 | M7                                         | M8 | M9 | M10 | M11 | M12 | M15 | M18 | M21 | M24 |
|------------------------------------|------------------------------------------------------------------------------------------------------------|-----------|----|----|----|----|----|----|--------------------------------------------|----|----|-----|-----|-----|-----|-----|-----|-----|
| <b>In index cases</b>              |                                                                                                            |           |    |    |    |    |    |    |                                            |    |    |     |     |     |     |     |     |     |
| 1                                  | Informed consent                                                                                           | X         |    |    |    |    |    |    |                                            |    |    |     |     |     |     |     |     |     |
| 2                                  | Demography, socio-economic status, co-morbidities, household characteristics, access to PDS                | X         |    |    |    |    |    |    |                                            |    |    |     |     |     |     |     |     |     |
| 3                                  | Clinical Evaluation                                                                                        | X         | X  | X  | X  | X  | X  | X  | X                                          | X  | X  | X   | X   | X   | X   | X   | X   | X   |
| 4                                  | Anthropometry (Height, Weight, MUAC), SpO <sub>2</sub> pedal edema                                         | X         | X  | X  | X  | X  | X  | X  | X                                          | X  | X  | X   | X   | X   | X   | X   | X   | X   |
| 5                                  | *Laboratory evaluation RBS, HIV, Hb                                                                        | X         |    |    |    |    |    |    |                                            |    |    |     |     |     |     |     |     |     |
| 6                                  | Compliance to Nutritional supplement in new cases, (12 mo. in MDR-TB)                                      | X         | X  | X  | X  | X  | X  | X  | X                                          | X  | X  | X   | X   | X   |     |     |     |     |
| 7                                  | Performance status (modified ECOG Scale)                                                                   | X         | X  | X  |    |    |    | X  | X                                          | X  | X  | X   | X   | X   |     |     |     |     |
| 8                                  | *CB NAAT                                                                                                   | X         |    |    |    |    |    |    | (in case of symptoms of recurrent disease) |    |    |     |     |     |     |     |     |     |
| 9                                  | *CXR                                                                                                       | X         |    |    |    |    |    | X  |                                            |    |    |     |     |     |     |     |     |     |
| <b>In subsample of index cases</b> |                                                                                                            |           |    |    |    |    |    |    |                                            |    |    |     |     |     |     |     |     |     |
| 1                                  | Dietary recall of calories, protein intake                                                                 | X         |    |    |    |    |    | X  |                                            |    |    |     |     |     |     |     |     |     |
| 2                                  | Body composition (By BIA)                                                                                  | X         |    |    |    |    |    | X  |                                            |    |    |     |     |     |     |     |     |     |
| 3                                  | Micronutrient estimation (Vit. A, D)                                                                       | X         |    |    |    |    |    |    |                                            |    |    |     |     |     |     |     |     |     |
| 4                                  | Hand grip strength                                                                                         | X         |    |    |    |    |    | X  |                                            |    |    |     |     |     |     |     |     |     |
| 5                                  | Immunological tests (4 <sup>th</sup> generation IGRA, lymphocyte subsets)                                  | X         |    |    |    |    |    | X  |                                            |    |    |     |     |     |     |     |     |     |
| <b>In household contacts</b>       |                                                                                                            |           |    |    |    |    |    |    |                                            |    |    |     |     |     |     |     |     |     |
| 1                                  | Informed consent                                                                                           | X         |    |    |    |    |    |    |                                            |    |    |     |     |     |     |     |     |     |
| 2                                  | Baseline demography, socio-economic status, co-morbid conditions, household characteristics, Access to PDS | X         |    |    |    |    |    |    |                                            |    |    |     |     |     |     |     |     |     |

|                                           |                                                                             |                                  |                                  |   |   |   |   |   |   |   |   |   |   |   |   |   |   |   |  |
|-------------------------------------------|-----------------------------------------------------------------------------|----------------------------------|----------------------------------|---|---|---|---|---|---|---|---|---|---|---|---|---|---|---|--|
| 3.                                        | Symptom screen                                                              | X                                | X                                | X | X | X | X | X |   |   | X |   |   | X | X | X | X | X |  |
| 4.                                        | Clinical Evaluation if symptomatic                                          | X                                | In case of symptoms of active TB |   |   |   |   |   |   |   |   |   |   |   |   |   |   |   |  |
| 5                                         | Anthropometry (Height, Weight, Upper mid arm circumference)                 | X                                | X                                | X | X | X | X | X |   |   | X |   |   | X | X | X | X | X |  |
| 6                                         | Compliance to Nutritional supplement (Intervention arm); (12 mo. in MDR-TB) | X                                | X                                | X | X | X | X | X |   |   |   |   |   |   |   |   |   |   |  |
| 7.                                        | #Review of non-TB infectious illnesses                                      | X                                | X                                | X | X | X | X | X | X | X | X | X | X | X | X | X | X | X |  |
| 8                                         | Sputum smear, CBNAAT                                                        | In case of symptoms of active TB |                                  |   |   |   |   |   |   |   |   |   |   |   |   |   |   |   |  |
| 9                                         | @CXR                                                                        | X                                | In case of symptoms of active TB |   |   |   |   |   |   |   |   |   |   |   |   |   |   |   |  |
| <b>In subsample of household contacts</b> |                                                                             |                                  |                                  |   |   |   |   |   |   |   |   |   |   |   |   |   |   |   |  |
| 1.                                        | Dietary recall of calories, protein intake                                  | X                                |                                  |   |   |   |   | X |   |   |   |   |   |   |   |   |   |   |  |
| 2                                         | Body composition (By BIA)                                                   | X                                |                                  |   |   |   |   | X |   |   |   |   |   |   |   |   |   |   |  |
| 3                                         | Micronutrient estimation (Vit. A, D)                                        | X                                |                                  |   |   |   |   |   |   |   |   |   |   |   |   |   |   |   |  |
| 4                                         | Immunological tests (4 <sup>th</sup> generation IGRA, lymphocyte subsets)   | X                                |                                  |   |   |   |   | X |   |   |   |   |   |   |   |   |   |   |  |

\* Through public health system; #respiratory infections, diarrhea, hospitalization with fever of any cause, death due to fever < 15 days duration; @ for under-five children, symptomatic contacts.

MUAC=Mid upper arm circumference; SpO2=Oxygen saturation; RBS=Random Blood Sugar; HIV=Human immunodeficiency virus; Hb=Hemoglobin; MDR-TB=Multidrug resistant tuberculosis; ECOG=Eastern Co-operative Oncology Group; CXR=Chest X-ray; CB NAAT=Cartridge based nucleic acid amplification test; BIA=Bio Impedance Analysis; PDS=public distribution system

**Table 5: Eastern Co-operative Oncology Group (ECOG) scale for functional assessment<sup>24</sup>**

| ECOG categories                                                                                              | Additional description                                                             | Score |
|--------------------------------------------------------------------------------------------------------------|------------------------------------------------------------------------------------|-------|
| Able to carry out normal activity without restriction                                                        | No physical restriction                                                            | 0     |
| Unable to do physically strenuous activity, but ambulatory and able to carry out light work                  | Able to walk around the neighbourhood, but unable to do any income-generating work | 1     |
| Ambulatory and capable of all self-care, but unable to carry out any work; up and about <50% of waking hours | Able to walk around the house and backyard                                         | 2     |
| Capable of only limited self-care; confined to bed or chair >50% of waking hours                             | Able to go to the bathroom,                                                        | 3     |
| Completely disabled; cannot carry out any self-care; totally confined to bed or chair                        | Unable to go to the bathroom                                                       | 4     |

**Table 6: Case definitions for outcomes used in RATIONS trial <sup>6</sup>**

| Outcome                                                        | Case definition                                                                                                                                                                                                                                                                                                                              |
|----------------------------------------------------------------|----------------------------------------------------------------------------------------------------------------------------------------------------------------------------------------------------------------------------------------------------------------------------------------------------------------------------------------------|
| Active tuberculosis                                            | Any patient with microbiologically confirmed tuberculosis or clinically diagnosed TB                                                                                                                                                                                                                                                         |
| Microbiologically confirmed tuberculosis in adults or children | <p>A patient who has a positive sputum smear for mycobacterium tuberculosis and/or</p> <ul style="list-style-type: none"> <li>- Sputum/gastric aspirate is positive on CB-NAAT</li> <li>- And/or positive on culture</li> </ul>                                                                                                              |
| Clinically diagnosed pulmonary TB                              | A patient who has symptoms suggestive of TB, is smear negative and/or negative on CB-NAAT, and/or who has chest X-ray is suggestive of TB, and where there is no alternative clinical diagnosis                                                                                                                                              |
| Clinically diagnosed extrapulmonary TB                         | A patient who is either negative on microbiological testing and/or CB-NAAT, or where an appropriate specimen is not available, and the findings (clinical/ biochemical/ cytological/ histopathological/radiological or direct visualization procedures) are suggestive of tuberculosis, and where alternative diagnosis have been ruled out. |
| Clinically diagnosed pulmonary TB in children                  | A patient who has symptoms suggestive of active pulmonary TB (Fever, cough, weight loss or absence of weight gain), and/or a chest X-ray is suggestive of TB, and there is absence of alternative diagnosis, who is negative on CB-NAAT on gastric aspirate or induced sputum, or when bacteriological confirmation has not been possible.   |

CB-NAAT=Cartridge based nucleic acid amplification test



1  
2  
3  
4  
5  
6  
7  
8  
9  
10  
11  
12  
13  
14  
15  
16  
17  
18  
19  
20  
21  
22  
23  
24  
25  
26  
27  
28  
29  
30  
31  
32  
33  
34  
35  
36  
37  
38  
39  
40  
41  
42  
43  
44  
45  
46  
47  
48  
49  
50  
51  
52  
53  
54  
55  
56  
57  
58  
59  
60



Study flow for the RATIONS Trial  
279x215mm (200 x 200 DPI)

**List of Tuberculosis treatment Units (TUs):**

1. DTC Seraikela
2. Rajnagar
3. Chandil
4. Adityapur
5. Gamharia
6. Kharsawan
7. Icchagarh
8. Angara-Ratu
9. Bundu
10. Doranda
11. Itki
12. Mandar-Burmu
13. Ormanjhi
14. Sadar (Ranchi)
15. Jagannathpur
16. Chaibasa (Urban)
17. Chakradharpur
18. Jhinkpani
19. Chaibasa (Rural)
20. Manjhari
21. Tantnagar
22. Dalbhumgarh
23. Sadar (Jamshedpur)
24. Mushabani
25. Mango
26. Baharaghoda
27. Jugsalai
28. Potka



STANDARD PROTOCOL ITEMS: RECOMMENDATIONS FOR INTERVENTIONAL TRIALS

SPIRIT 2013 Checklist: Recommended items to address in a clinical trial protocol and related documents\*

| Section/item                      | ItemN | Description                                                                                                  | Addressed on page number                                                                       |
|-----------------------------------|-------|--------------------------------------------------------------------------------------------------------------|------------------------------------------------------------------------------------------------|
| <b>Administrative information</b> |       |                                                                                                              |                                                                                                |
| Title                             | 1     | Descriptive title identifying the study design, population, interventions, and, if applicable, trial acronym | Page 1                                                                                         |
| Trial registration                | 2a    | Trial identifier and registry name. If not yet registered, name of intended registry                         | Page 2 and 16<br>CTRI/2019/08/020<br>490), Clinical Trials<br>Registry of India.               |
|                                   | 2b    | All items from the World Health Organization Trial Registration Data Set                                     | Not applicable                                                                                 |
| Protocol version                  | 3     | Date and version identifier                                                                                  | Page 1                                                                                         |
| Funding                           | 4     | Sources and types of financial, material, and other support                                                  | Page no.6, 7                                                                                   |
| Roles and responsibilities        | 5a    | Names, affiliations, and roles of protocol contributors                                                      | Affiliation in<br>submission<br>website<br>placeholders and<br>protocol<br>contribution: Pg 16 |
|                                   | 5b    | Name and contact information for the trial sponsor                                                           | Page 2, 16                                                                                     |

|    |                                                           |                                                                                                                 |                                                                                                               |
|----|-----------------------------------------------------------|-----------------------------------------------------------------------------------------------------------------|---------------------------------------------------------------------------------------------------------------|
| 1  | 5c                                                        | Role of study sponsor and funders, if any, in study design; collection, management, analysis, and               | Page 16                                                                                                       |
| 2  |                                                           | interpretation of data; writing of the report; and the decision to submit the report for publication, including |                                                                                                               |
| 3  |                                                           | whether they will have ultimate authority over any of these activities                                          |                                                                                                               |
| 4  |                                                           |                                                                                                                 |                                                                                                               |
| 5  | 5d                                                        | Composition, roles, and responsibilities of the coordinating centre, steering committee, endpoint               | Appendix- 1                                                                                                   |
| 6  |                                                           | adjudication committee, data management team, and other individuals or groups overseeing the trial, if          |                                                                                                               |
| 7  |                                                           | applicable (see Item 21a for data monitoring committee)                                                         |                                                                                                               |
| 8  |                                                           |                                                                                                                 |                                                                                                               |
| 9  |                                                           |                                                                                                                 |                                                                                                               |
| 10 |                                                           |                                                                                                                 |                                                                                                               |
| 11 |                                                           |                                                                                                                 |                                                                                                               |
| 12 |                                                           |                                                                                                                 |                                                                                                               |
| 13 |                                                           |                                                                                                                 |                                                                                                               |
| 14 | <b>Introduction</b>                                       |                                                                                                                 |                                                                                                               |
| 15 |                                                           |                                                                                                                 |                                                                                                               |
| 16 | Background and                                            | 6a                                                                                                              | Description of research question and justification for undertaking the trial, including summary of relevant   |
| 17 | rationale                                                 |                                                                                                                 | studies (published and unpublished) examining benefits and harms for each intervention                        |
| 18 |                                                           |                                                                                                                 |                                                                                                               |
| 19 |                                                           | 6b                                                                                                              | Explanation for choice of comparators                                                                         |
| 20 |                                                           |                                                                                                                 | Page 4-6                                                                                                      |
| 21 | Objectives                                                | 7                                                                                                               | Specific objectives or hypotheses                                                                             |
| 22 |                                                           |                                                                                                                 | Pages 5-6, Table 1                                                                                            |
| 23 | Trial design                                              | 8                                                                                                               | Description of trial design including type of trial (eg, parallel group, crossover, factorial, single group), |
| 24 |                                                           |                                                                                                                 | allocation ratio, and framework (eg, superiority, equivalence, noninferiority, exploratory)                   |
| 25 |                                                           |                                                                                                                 | Pages 6-7                                                                                                     |
| 26 |                                                           |                                                                                                                 |                                                                                                               |
| 27 | <b>Methods: Participants, interventions, and outcomes</b> |                                                                                                                 |                                                                                                               |
| 28 |                                                           |                                                                                                                 |                                                                                                               |
| 29 | Study setting                                             | 9                                                                                                               | Description of study settings (eg, community clinic, academic hospital) and list of countries where data will |
| 30 |                                                           |                                                                                                                 | be collected. Reference to where list of study sites can be obtained                                          |
| 31 |                                                           |                                                                                                                 | Page 7,                                                                                                       |
| 32 | Eligibility criteria                                      | 10                                                                                                              | Inclusion and exclusion criteria for participants. If applicable, eligibility criteria for study centres and  |
| 33 |                                                           |                                                                                                                 | individuals who will perform the interventions (eg, surgeons, psychotherapists)                               |
| 34 |                                                           |                                                                                                                 | Page 7, Table 2                                                                                               |
| 35 | Interventions                                             | 11a                                                                                                             | Interventions for each group with sufficient detail to allow replication, including how and when they will be |
| 36 |                                                           |                                                                                                                 | administered                                                                                                  |
| 37 |                                                           |                                                                                                                 | Pages 7-8                                                                                                     |
| 38 |                                                           | 11b                                                                                                             | Criteria for discontinuing or modifying allocated interventions for a given trial participant (eg, drug dose  |
| 39 |                                                           |                                                                                                                 | change in response to harms, participant request, or improving/worsening disease)                             |
| 40 |                                                           |                                                                                                                 | Page 11                                                                                                       |
| 41 |                                                           |                                                                                                                 |                                                                                                               |
| 42 |                                                           |                                                                                                                 |                                                                                                               |
| 43 |                                                           |                                                                                                                 |                                                                                                               |
| 44 |                                                           |                                                                                                                 |                                                                                                               |
| 45 |                                                           |                                                                                                                 |                                                                                                               |
| 46 |                                                           |                                                                                                                 |                                                                                                               |

|    |                      |     |                                                                                                                                                                                                                                                                                                                                                                                |                                                                                         |
|----|----------------------|-----|--------------------------------------------------------------------------------------------------------------------------------------------------------------------------------------------------------------------------------------------------------------------------------------------------------------------------------------------------------------------------------|-----------------------------------------------------------------------------------------|
| 1  |                      | 11c | Strategies to improve adherence to intervention protocols, and any procedures for monitoring adherence (eg, drug tablet return, laboratory tests)                                                                                                                                                                                                                              | Pages 10                                                                                |
| 2  |                      |     |                                                                                                                                                                                                                                                                                                                                                                                |                                                                                         |
| 3  |                      |     |                                                                                                                                                                                                                                                                                                                                                                                |                                                                                         |
| 4  |                      | 11d | Relevant concomitant care and interventions that are permitted or prohibited during the trial                                                                                                                                                                                                                                                                                  | Page 8                                                                                  |
| 5  |                      |     |                                                                                                                                                                                                                                                                                                                                                                                |                                                                                         |
| 6  | Outcomes             | 12  | Primary, secondary, and other outcomes, including the specific measurement variable (eg, systolic blood pressure), analysis metric (eg, change from baseline, final value, time to event), method of aggregation (eg, median, proportion), and time point for each outcome. Explanation of the clinical relevance of chosen efficacy and harm outcomes is strongly recommended | Pages 5-6, Table 1                                                                      |
| 7  |                      |     |                                                                                                                                                                                                                                                                                                                                                                                |                                                                                         |
| 8  |                      |     |                                                                                                                                                                                                                                                                                                                                                                                |                                                                                         |
| 9  |                      |     |                                                                                                                                                                                                                                                                                                                                                                                |                                                                                         |
| 10 |                      |     |                                                                                                                                                                                                                                                                                                                                                                                |                                                                                         |
| 11 | Participant timeline | 13  | Time schedule of enrolment, interventions (including any run-ins and washouts), assessments, and visits for participants. A schematic diagram is highly recommended (see Figure)                                                                                                                                                                                               | Pages 7-10,12, Table 4                                                                  |
| 12 |                      |     |                                                                                                                                                                                                                                                                                                                                                                                |                                                                                         |
| 13 |                      |     |                                                                                                                                                                                                                                                                                                                                                                                |                                                                                         |
| 14 | Sample size          | 14  | Estimated number of participants needed to achieve study objectives and how it was determined, including clinical and statistical assumptions supporting any sample size calculations                                                                                                                                                                                          | Page 12-13                                                                              |
| 15 |                      |     |                                                                                                                                                                                                                                                                                                                                                                                |                                                                                         |
| 16 |                      |     |                                                                                                                                                                                                                                                                                                                                                                                |                                                                                         |
| 17 |                      |     |                                                                                                                                                                                                                                                                                                                                                                                |                                                                                         |
| 18 | Recruitment          | 15  | Strategies for achieving adequate participant enrolment to reach target sample size                                                                                                                                                                                                                                                                                            | We are enrolling consenting patients who have been diagnosed in the National TB program |
| 19 |                      |     |                                                                                                                                                                                                                                                                                                                                                                                |                                                                                         |
| 20 |                      |     |                                                                                                                                                                                                                                                                                                                                                                                |                                                                                         |
| 21 |                      |     |                                                                                                                                                                                                                                                                                                                                                                                |                                                                                         |
| 22 |                      |     |                                                                                                                                                                                                                                                                                                                                                                                |                                                                                         |
| 23 |                      |     |                                                                                                                                                                                                                                                                                                                                                                                |                                                                                         |
| 24 |                      |     |                                                                                                                                                                                                                                                                                                                                                                                |                                                                                         |
| 25 |                      |     |                                                                                                                                                                                                                                                                                                                                                                                |                                                                                         |
| 26 |                      |     |                                                                                                                                                                                                                                                                                                                                                                                |                                                                                         |

27 **Methods: Assignment of interventions (for controlled trials)**

28 Allocation:

|    |                                  |     |                                                                                                                                                                                                                                                                                                                                                          |                                                                  |
|----|----------------------------------|-----|----------------------------------------------------------------------------------------------------------------------------------------------------------------------------------------------------------------------------------------------------------------------------------------------------------------------------------------------------------|------------------------------------------------------------------|
| 29 |                                  |     |                                                                                                                                                                                                                                                                                                                                                          |                                                                  |
| 30 |                                  |     |                                                                                                                                                                                                                                                                                                                                                          |                                                                  |
| 31 | Sequence generation              | 16a | Method of generating the allocation sequence (eg, computer-generated random numbers), and list of any factors for stratification. To reduce predictability of a random sequence, details of any planned restriction (eg, blocking) should be provided in a separate document that is unavailable to those who enrol participants or assign interventions | Pages 8-9                                                        |
| 32 |                                  |     |                                                                                                                                                                                                                                                                                                                                                          |                                                                  |
| 33 |                                  |     |                                                                                                                                                                                                                                                                                                                                                          |                                                                  |
| 34 |                                  |     |                                                                                                                                                                                                                                                                                                                                                          |                                                                  |
| 35 |                                  |     |                                                                                                                                                                                                                                                                                                                                                          |                                                                  |
| 36 | Allocation concealment mechanism | 16b | Mechanism of implementing the allocation sequence (eg, central telephone; sequentially numbered, opaque, sealed envelopes), describing any steps to conceal the sequence until interventions are assigned                                                                                                                                                | Not applicable as this is an open label cluster randomised trial |
| 37 |                                  |     |                                                                                                                                                                                                                                                                                                                                                          |                                                                  |
| 38 |                                  |     |                                                                                                                                                                                                                                                                                                                                                          |                                                                  |
| 39 |                                  |     |                                                                                                                                                                                                                                                                                                                                                          |                                                                  |
| 40 |                                  |     |                                                                                                                                                                                                                                                                                                                                                          |                                                                  |
| 41 |                                  |     |                                                                                                                                                                                                                                                                                                                                                          |                                                                  |
| 42 |                                  |     |                                                                                                                                                                                                                                                                                                                                                          |                                                                  |

|    |                                                           |     |                                                                                                                                                                                                                                                                                                                                                                                                              |                               |
|----|-----------------------------------------------------------|-----|--------------------------------------------------------------------------------------------------------------------------------------------------------------------------------------------------------------------------------------------------------------------------------------------------------------------------------------------------------------------------------------------------------------|-------------------------------|
| 1  | Implementation                                            | 16c | Who will generate the allocation sequence, who will enrol participants, and who will assign participants to interventions                                                                                                                                                                                                                                                                                    | Pages 8-9                     |
| 2  |                                                           |     |                                                                                                                                                                                                                                                                                                                                                                                                              |                               |
| 3  |                                                           |     |                                                                                                                                                                                                                                                                                                                                                                                                              |                               |
| 4  | Blinding (masking)                                        | 17a | Who will be blinded after assignment to interventions (eg, trial participants, care providers, outcome assessors, data analysts), and how                                                                                                                                                                                                                                                                    | Pages 8-9, trial participants |
| 5  |                                                           |     |                                                                                                                                                                                                                                                                                                                                                                                                              |                               |
| 6  |                                                           |     |                                                                                                                                                                                                                                                                                                                                                                                                              |                               |
| 7  |                                                           | 17b | If blinded, circumstances under which unblinding is permissible, and procedure for revealing a participant's allocated intervention during the trial                                                                                                                                                                                                                                                         | Not applicable                |
| 8  |                                                           |     |                                                                                                                                                                                                                                                                                                                                                                                                              |                               |
| 9  |                                                           |     |                                                                                                                                                                                                                                                                                                                                                                                                              |                               |
| 10 |                                                           |     |                                                                                                                                                                                                                                                                                                                                                                                                              |                               |
| 11 | <b>Methods: Data collection, management, and analysis</b> |     |                                                                                                                                                                                                                                                                                                                                                                                                              |                               |
| 12 |                                                           |     |                                                                                                                                                                                                                                                                                                                                                                                                              |                               |
| 13 | Data collection methods                                   | 18a | Plans for assessment and collection of outcome, baseline, and other trial data, including any related processes to promote data quality (eg, duplicate measurements, training of assessors) and a description of study instruments (eg, questionnaires, laboratory tests) along with their reliability and validity, if known. Reference to where data collection forms can be found, if not in the protocol | Pages 7-9, Page 13            |
| 14 |                                                           |     |                                                                                                                                                                                                                                                                                                                                                                                                              |                               |
| 15 |                                                           |     |                                                                                                                                                                                                                                                                                                                                                                                                              |                               |
| 16 |                                                           |     |                                                                                                                                                                                                                                                                                                                                                                                                              |                               |
| 17 |                                                           |     |                                                                                                                                                                                                                                                                                                                                                                                                              |                               |
| 18 |                                                           |     |                                                                                                                                                                                                                                                                                                                                                                                                              |                               |
| 19 |                                                           | 18b | Plans to promote participant retention and complete follow-up, including list of any outcome data to be collected for participants who discontinue or deviate from intervention protocols                                                                                                                                                                                                                    | Page 10                       |
| 20 |                                                           |     |                                                                                                                                                                                                                                                                                                                                                                                                              |                               |
| 21 |                                                           |     |                                                                                                                                                                                                                                                                                                                                                                                                              |                               |
| 22 | Data management                                           | 19  | Plans for data entry, coding, security, and storage, including any related processes to promote data quality (eg, double data entry; range checks for data values). Reference to where details of data management procedures can be found, if not in the protocol                                                                                                                                            | Page 13                       |
| 23 |                                                           |     |                                                                                                                                                                                                                                                                                                                                                                                                              |                               |
| 24 |                                                           |     |                                                                                                                                                                                                                                                                                                                                                                                                              |                               |
| 25 |                                                           |     |                                                                                                                                                                                                                                                                                                                                                                                                              |                               |
| 26 | Statistical methods                                       | 20a | Statistical methods for analysing primary and secondary outcomes. Reference to where other details of the statistical analysis plan can be found, if not in the protocol                                                                                                                                                                                                                                     | Page 13-15                    |
| 27 |                                                           |     |                                                                                                                                                                                                                                                                                                                                                                                                              |                               |
| 28 |                                                           |     |                                                                                                                                                                                                                                                                                                                                                                                                              |                               |
| 29 |                                                           |     |                                                                                                                                                                                                                                                                                                                                                                                                              |                               |
| 30 |                                                           | 20b | Methods for any additional analyses (eg, subgroup and adjusted analyses)                                                                                                                                                                                                                                                                                                                                     | Page 14                       |
| 31 |                                                           |     |                                                                                                                                                                                                                                                                                                                                                                                                              |                               |
| 32 |                                                           | 20c | Definition of analysis population relating to protocol non-adherence (eg, as randomised analysis), and any statistical methods to handle missing data (eg, multiple imputation)                                                                                                                                                                                                                              | Page 13                       |
| 33 |                                                           |     |                                                                                                                                                                                                                                                                                                                                                                                                              |                               |
| 34 |                                                           |     |                                                                                                                                                                                                                                                                                                                                                                                                              |                               |
| 35 | <b>Methods: Monitoring</b>                                |     |                                                                                                                                                                                                                                                                                                                                                                                                              |                               |
| 36 |                                                           |     |                                                                                                                                                                                                                                                                                                                                                                                                              |                               |
| 37 | Data monitoring                                           | 21a | Composition of data monitoring committee (DMC); summary of its role and reporting structure; statement of whether it is independent from the sponsor and competing interests; and reference to where further details about its charter can be found, if not in the protocol. Alternatively, an explanation of why a DMC is not needed                                                                        | Page 13                       |
| 38 |                                                           |     |                                                                                                                                                                                                                                                                                                                                                                                                              |                               |
| 39 |                                                           |     |                                                                                                                                                                                                                                                                                                                                                                                                              |                               |
| 40 |                                                           |     |                                                                                                                                                                                                                                                                                                                                                                                                              |                               |
| 41 |                                                           |     |                                                                                                                                                                                                                                                                                                                                                                                                              |                               |
| 42 |                                                           |     |                                                                                                                                                                                                                                                                                                                                                                                                              |                               |
| 43 |                                                           |     |                                                                                                                                                                                                                                                                                                                                                                                                              |                               |
| 44 |                                                           |     |                                                                                                                                                                                                                                                                                                                                                                                                              |                               |
| 45 |                                                           |     |                                                                                                                                                                                                                                                                                                                                                                                                              |                               |
| 46 |                                                           |     |                                                                                                                                                                                                                                                                                                                                                                                                              |                               |

|    |                                 |     |                                                                                                                                                                                                                                  |                                                                                                                                                                                |
|----|---------------------------------|-----|----------------------------------------------------------------------------------------------------------------------------------------------------------------------------------------------------------------------------------|--------------------------------------------------------------------------------------------------------------------------------------------------------------------------------|
| 1  |                                 | 21b | Description of any interim analyses and stopping guidelines, including who will have access to these interim results and make the final decision to terminate the trial                                                          | Page 15                                                                                                                                                                        |
| 2  |                                 |     |                                                                                                                                                                                                                                  |                                                                                                                                                                                |
| 3  |                                 |     |                                                                                                                                                                                                                                  |                                                                                                                                                                                |
| 4  | Harms                           | 22  | Plans for collecting, assessing, reporting, and managing solicited and spontaneously reported adverse events and other unintended effects of trial interventions or trial conduct                                                | Page 15                                                                                                                                                                        |
| 5  |                                 |     |                                                                                                                                                                                                                                  |                                                                                                                                                                                |
| 6  |                                 |     |                                                                                                                                                                                                                                  |                                                                                                                                                                                |
| 7  | Auditing                        | 23  | Frequency and procedures for auditing trial conduct, if any, and whether the process will be independent from investigators and the sponsor                                                                                      | Page 13 mentions reporting and oversight in the trial. Decision for audit lies with the trial sponsor. This is not a drug trial so audit by regulatory agency is not involved. |
| 8  |                                 |     |                                                                                                                                                                                                                                  |                                                                                                                                                                                |
| 9  |                                 |     |                                                                                                                                                                                                                                  |                                                                                                                                                                                |
| 10 |                                 |     |                                                                                                                                                                                                                                  |                                                                                                                                                                                |
| 11 |                                 |     |                                                                                                                                                                                                                                  |                                                                                                                                                                                |
| 12 |                                 |     |                                                                                                                                                                                                                                  |                                                                                                                                                                                |
| 13 |                                 |     |                                                                                                                                                                                                                                  |                                                                                                                                                                                |
| 14 |                                 |     |                                                                                                                                                                                                                                  |                                                                                                                                                                                |
| 15 |                                 |     |                                                                                                                                                                                                                                  |                                                                                                                                                                                |
| 16 |                                 |     |                                                                                                                                                                                                                                  |                                                                                                                                                                                |
| 17 |                                 |     |                                                                                                                                                                                                                                  |                                                                                                                                                                                |
| 18 |                                 |     |                                                                                                                                                                                                                                  |                                                                                                                                                                                |
| 19 |                                 |     |                                                                                                                                                                                                                                  |                                                                                                                                                                                |
| 20 |                                 |     |                                                                                                                                                                                                                                  |                                                                                                                                                                                |
| 21 | <b>Ethics and dissemination</b> |     |                                                                                                                                                                                                                                  |                                                                                                                                                                                |
| 22 |                                 |     |                                                                                                                                                                                                                                  |                                                                                                                                                                                |
| 23 | Research ethics approval        | 24  | Plans for seeking research ethics committee/institutional review board (REC/IRB) approval                                                                                                                                        | Page 15                                                                                                                                                                        |
| 24 |                                 |     |                                                                                                                                                                                                                                  |                                                                                                                                                                                |
| 25 |                                 |     |                                                                                                                                                                                                                                  |                                                                                                                                                                                |
| 26 | Protocol amendments             | 25  | Plans for communicating important protocol modifications (eg, changes to eligibility criteria, outcomes, analyses) to relevant parties (eg, investigators, REC/IRBs, trial participants, trial registries, journals, regulators) | Page 15                                                                                                                                                                        |
| 27 |                                 |     |                                                                                                                                                                                                                                  |                                                                                                                                                                                |
| 28 |                                 |     |                                                                                                                                                                                                                                  |                                                                                                                                                                                |
| 29 |                                 |     |                                                                                                                                                                                                                                  |                                                                                                                                                                                |
| 30 | Consent or assent               | 26a | Who will obtain informed consent or assent from potential trial participants or authorised surrogates, and how (see Item 32)                                                                                                     | Page 9                                                                                                                                                                         |
| 31 |                                 |     |                                                                                                                                                                                                                                  |                                                                                                                                                                                |
| 32 |                                 |     |                                                                                                                                                                                                                                  |                                                                                                                                                                                |
| 33 |                                 |     |                                                                                                                                                                                                                                  |                                                                                                                                                                                |
| 34 |                                 | 26b | Additional consent provisions for collection and use of participant data and biological specimens in ancillary studies, if applicable                                                                                            | Page 15                                                                                                                                                                        |
| 35 |                                 |     |                                                                                                                                                                                                                                  |                                                                                                                                                                                |
| 36 |                                 |     |                                                                                                                                                                                                                                  |                                                                                                                                                                                |
| 37 | Confidentiality                 | 27  | How personal information about potential and enrolled participants will be collected, shared, and maintained in order to protect confidentiality before, during, and after the trial                                             | Page 15                                                                                                                                                                        |
| 38 |                                 |     |                                                                                                                                                                                                                                  |                                                                                                                                                                                |
| 39 |                                 |     |                                                                                                                                                                                                                                  |                                                                                                                                                                                |
| 40 | Declaration of interests        | 28  | Financial and other competing interests for principal investigators for the overall trial and each study site                                                                                                                    | Page 16                                                                                                                                                                        |
| 41 |                                 |     |                                                                                                                                                                                                                                  |                                                                                                                                                                                |
| 42 |                                 |     |                                                                                                                                                                                                                                  |                                                                                                                                                                                |

|    |                      |     |                                                                                                                 |                  |
|----|----------------------|-----|-----------------------------------------------------------------------------------------------------------------|------------------|
| 1  | Access to data       | 29  | Statement of who will have access to the final trial dataset, and disclosure of contractual agreements that     | Page 13          |
| 2  |                      |     | limit such access for investigators                                                                             |                  |
| 3  |                      |     |                                                                                                                 |                  |
| 4  | Ancillary and post-  | 30  | Provisions, if any, for ancillary and post-trial care, and for compensation to those who suffer harm from trial | Page 15          |
| 5  | trial care           |     | participation                                                                                                   |                  |
| 6  |                      |     |                                                                                                                 |                  |
| 7  | Dissemination policy | 31a | Plans for investigators and sponsor to communicate trial results to participants, healthcare professionals,     | Page 15-16       |
| 8  |                      |     | the public, and other relevant groups (eg, via publication, reporting in results databases, or other data       |                  |
| 9  |                      |     | sharing arrangements), including any publication restrictions                                                   |                  |
| 10 |                      |     |                                                                                                                 |                  |
| 11 |                      | 31b | Authorship eligibility guidelines and any intended use of professional writers                                  | We shall follow  |
| 12 |                      |     |                                                                                                                 | ICMJE guidelines |
| 13 |                      |     |                                                                                                                 |                  |
| 14 |                      | 31c | Plans, if any, for granting public access to the full protocol, participant-level dataset, and statistical code | No plans         |
| 15 |                      |     |                                                                                                                 |                  |
| 16 |                      |     |                                                                                                                 |                  |
| 17 | <b>Appendices</b>    |     |                                                                                                                 |                  |
| 18 |                      |     |                                                                                                                 |                  |
| 19 | Informed consent     | 32  | Model consent form and other related documentation given to participants and authorised surrogates              | Appendix-2 (for  |
| 20 | materials            |     |                                                                                                                 | editor only)     |
| 21 |                      |     |                                                                                                                 |                  |
| 22 | Biological           | 33  | Plans for collection, laboratory evaluation, and storage of biological specimens for genetic or molecular       | Page 15          |
| 23 | specimens            |     | analysis in the current trial and for future use in ancillary studies, if applicable                            |                  |
| 24 |                      |     |                                                                                                                 |                  |
| 25 |                      |     |                                                                                                                 |                  |

\*It is strongly recommended that this checklist be read in conjunction with the SPIRIT 2013 Explanation & Elaboration for important clarification on the items. Amendments to the protocol should be tracked and dated. The SPIRIT checklist is copyrighted by the SPIRIT Group under the Creative Commons [“Attribution-NonCommercial-NoDerivs 3.0 Unported”](https://creativecommons.org/licenses/by-nc-nd/3.0/) license.
