# Supplementary material for: The RATIONS (Reducing Activation of Tuberculosis by Improvement of Nutritional Status) study: a cluster randomised trial of nutritional support (food rations) to reduce TB incidence in household contacts of patients with microbiologically confirmed pulmonary tuberculosis in communities with a high prevalence of undernutrition, Jharkhand, India
Source: PubMed Central journal article supplement — BMJ Open. 2021 May 20;11(5):e047210. doi: 10.1136/bmjopen-2020-047210 (PMC8141431; doi:10.1136/bmjopen-2020-047210), 2021-05-20
Supplement: bmjopen-2020-047210supp001.pdf [file bmjopen-2020-047210supp001.pdf]

**List of Tuberculosis treatment Units (TUs):**

1. DTC Seraikela
2. Rajnagar
3. Chandil
4. Adityapur
5. Gamharia
6. Kharsawan
7. Icchagarh
8. Angara-Ratu
9. Bundu
10. Doranda
11. Itki
12. Mandar-Burmu
13. Ormanjhi
14. Sadar (Ranchi)
15. Jagannathpur
16. Chaibasa (Urban)
17. Chakradharpur
18. Jhinkpani
19. Chaibasa (Rural)
20. Manjhari
21. Tantnagar
22. Dalbhumgarh
23. Sadar (Jamshedpur)
24. Mushabani
25. Mango
26. Baharaghoda
27. Jugsalai
28. Potka
